# Supplementary material for: Cross C–S coupling reaction catalyzed by copper(i) N-heterocyclic carbene complexes
Source: Royal Society of Chemistry journal article supplement (doi:10.1039/c6ra27757h), 2017-01-01
Supplement: c6ra27757h1.pdf [file c6ra27757h1.pdf]

## Supporting Information

### Cross C-S coupling reaction catalyzed by copper (I) *N*-heterocyclic carbene complexes

Wei-Kai Huang,<sup>a,b</sup> Wei-Ting Chen,<sup>c</sup> I-Jui Hsu,<sup>c\*</sup> Chien-Chung Han<sup>b\*</sup> and Shin-Guang Shyu<sup>a\*</sup>

- <sup>a</sup> Institute of Chemistry, Academia Sinica, Taipei 11529, Taiwan, Republic of China  
E-mail: sgshyu@chem.sinica.edu.tw
- <sup>b</sup> Department of Chemistry, National Tsing Hua University, Hsinchu 30013, Taiwan, Republic of China.  
E-mail: cchan@mx.nthu.edu.tw
- <sup>c</sup> Department of Molecular Science and Engineering, National Taipei University of Technology, Taipei 10608, Taiwan, Republic of China.  
E-mail: ijuihsu@ntut.edu.tw

### Table of Contents

|                                                                                                                                                                      |     |
|----------------------------------------------------------------------------------------------------------------------------------------------------------------------|-----|
| DOSY Experiment .....                                                                                                                                                | S2  |
| NMR Spectra .....                                                                                                                                                    | S4  |
| GC Data .....                                                                                                                                                        | S15 |
| The Basis Set Effect on Molecular Geometry .....                                                                                                                     | S36 |
| The Equilibriums of Copper Species in Toluene or in DMF.....                                                                                                         | S38 |
| Free Energy Profile (kcal/mol) for (a) Oxidative Addition/Reductive Elimination Paths and (b) $\sigma$ -Bond Metathesis Paths When Base is NaO <sup>t</sup> Bu ..... | S39 |
| The Results Obtained by B3LYP/BS-1 .....                                                                                                                             | S40 |
| Molecular Geometry, Free Energy Correction and PCM Energy.....                                                                                                       | S43 |

## DOSY Experiment

In a glove box, IMes-Cu-SPh (8 mg, 16.8  $\mu\text{mol}$ ) was transferred to an NMR tube, and  $d_8$ -toluene (0.5 mL) was added. A DOSY spectrum was acquired on a Bruker AVIII-500 and probe temperature of 25 °C. Hydrodynamic Radii was calculated from the diffusion constants (D) using the Stokes-Einstein equation.

**Table S1.** Measured Hydrodynamic Radii.

| Compound       | D ( $10^{-10}$ m <sup>2</sup> /s) | Hydrodynamic Radii (Å) |
|----------------|-----------------------------------|------------------------|
| $d^8$ -toluene | 25.06 (1)                         | 1.50                   |
| IMes-Cu-SPh    | 7.46 (4)                          | 5.04                   |

**Calculation of Molar Volumes.** In order to obtain molar volume, Monte-Carlo integration over the electron density grid was carried out by the single point calculation with “Volume” keyword (0.001  $e^-/\text{Bohr}^3$  cutoff density, 1000 test points/ $\text{Bohr}^3$ ). The B3LYP functional with the basis set of SDD for heavy atoms (Cu and I) and 6-311+G(d,p) for others was employed. All volume calculations were run in triplicate due to the random error associated with Monte-Carlo methods.

**Table S2.** DFT Calculated Radii.

| Species                    | Volume (cm <sup>3</sup> /mol) |                     |                     | Average (cm <sup>3</sup> /mol) | Radii (Å) |
|----------------------------|-------------------------------|---------------------|---------------------|--------------------------------|-----------|
|                            | 1 <sup>st</sup> Run           | 2 <sup>nd</sup> Run | 3 <sup>rd</sup> Run |                                |           |
| IMes-Cu-SPh                | 369.9                         | 352.9               | 357.2               | 360.0 (72)                     | 5.23      |
| (IMes-Cu-SPh) <sub>2</sub> | 698.6                         | 704.7               | 707.3               | 703.5 (36)                     | 6.53      |

# Proton 2D DOSY-NMR Spectrum (IMes-Cu-SPh)

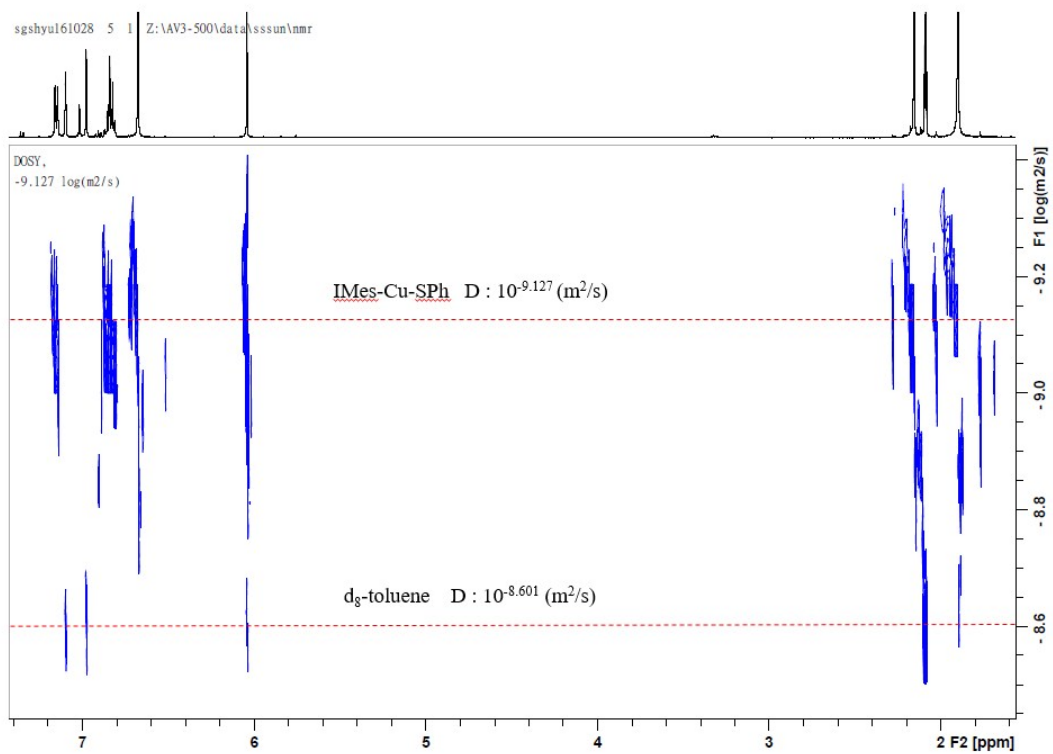

# NMR Spectra

$^1\text{H}$  and  $^{13}\text{C}\{^1\text{H}\}$  NMR ( $\text{CDCl}_3$ ); IMes-Cu-Cl

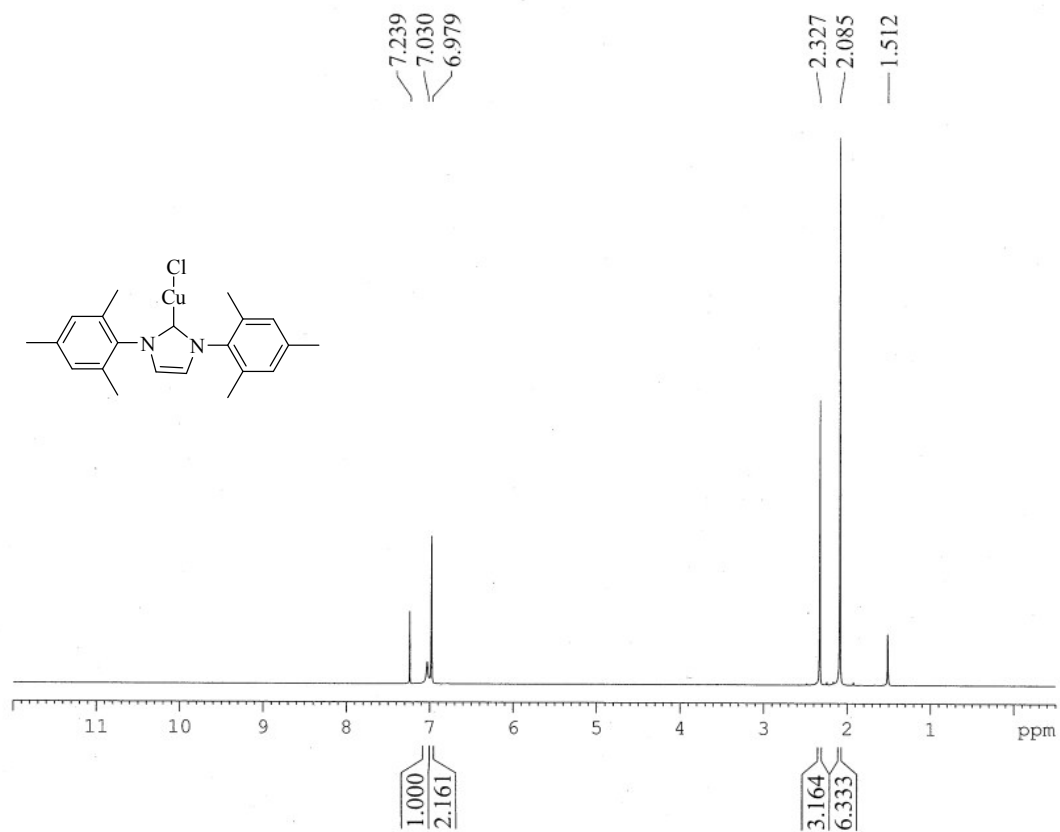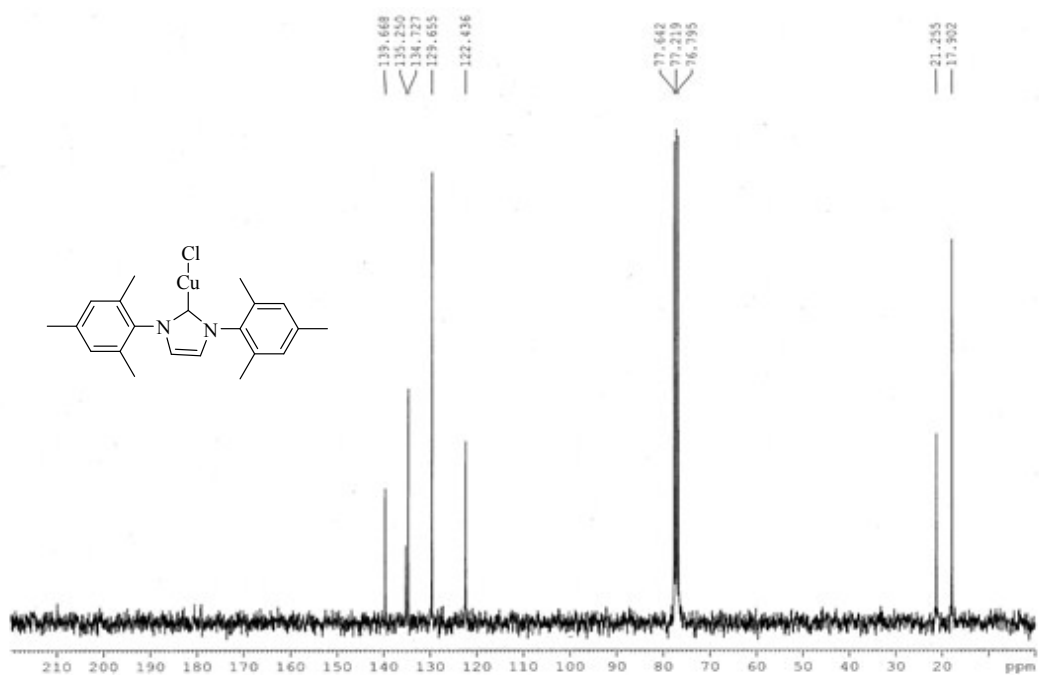

$^1\text{H}$  and  $^{13}\text{C}\{^1\text{H}\}$  NMR ( $\text{CDCl}_3$ ); IPr-Cu-Cl

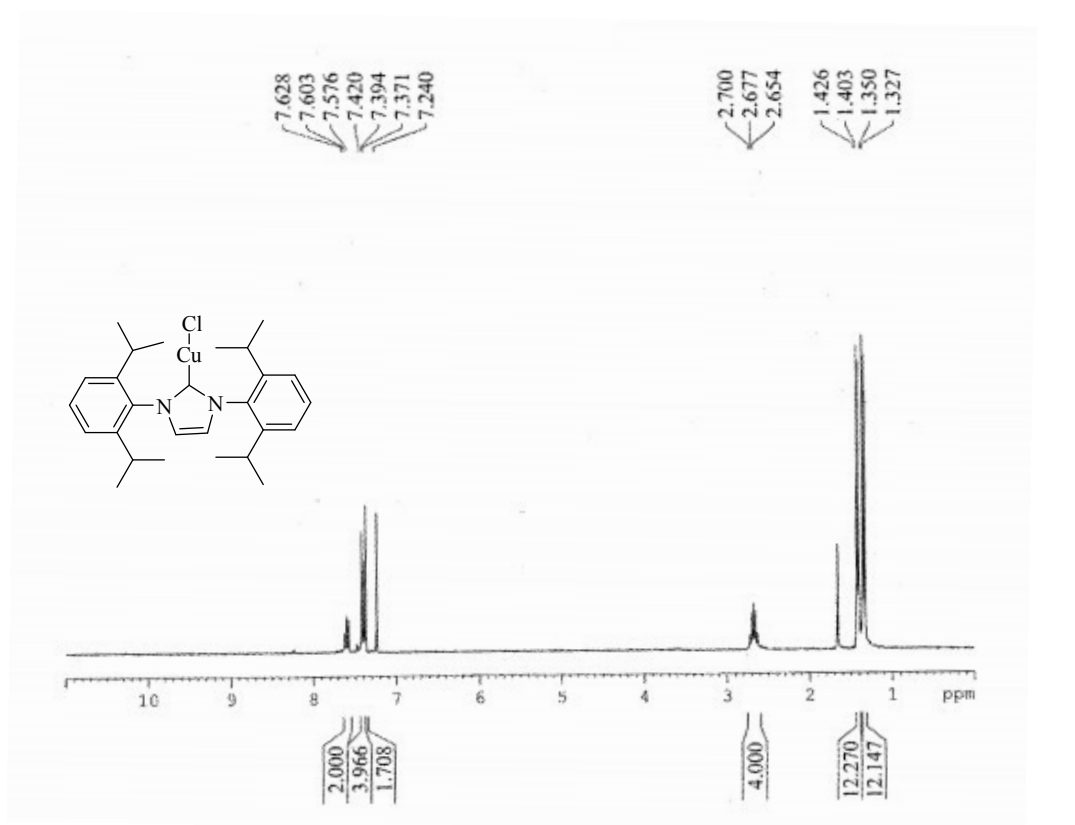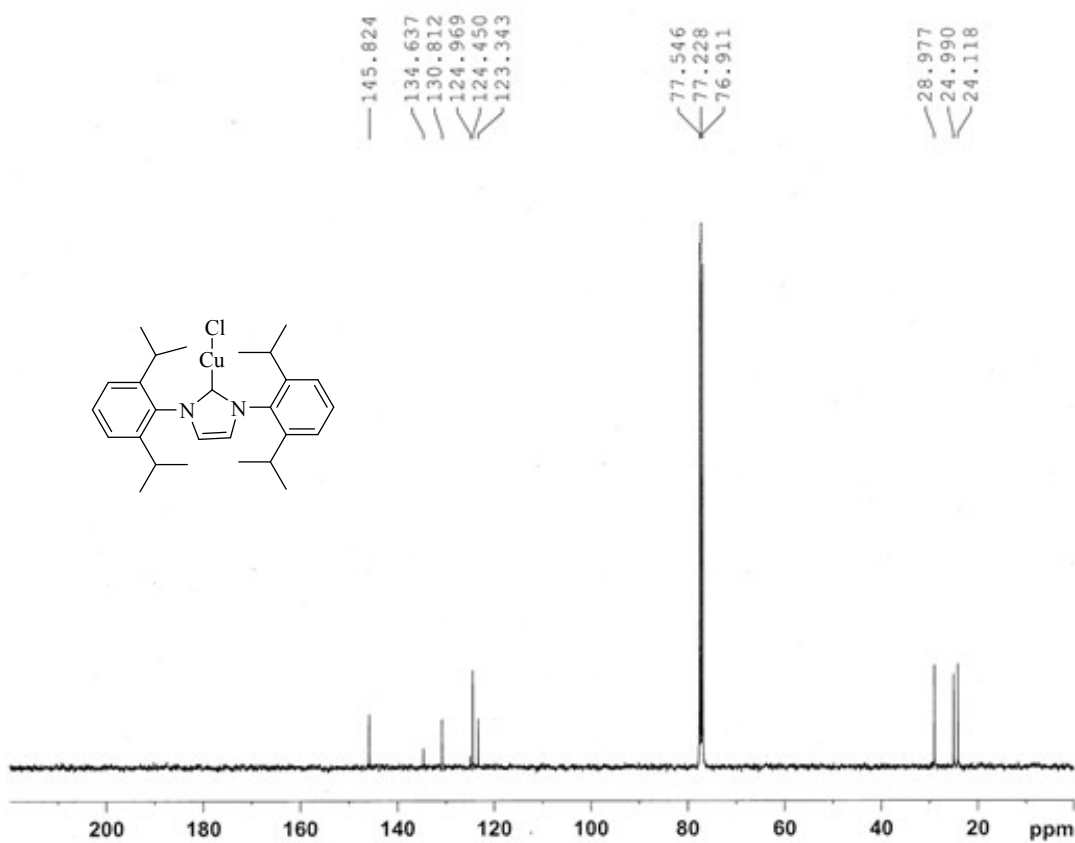

$^1\text{H}$  and  $^{13}\text{C}\{^1\text{H}\}$  NMR ( $\text{C}_6\text{D}_6$ ); IMes-Cu-SPh

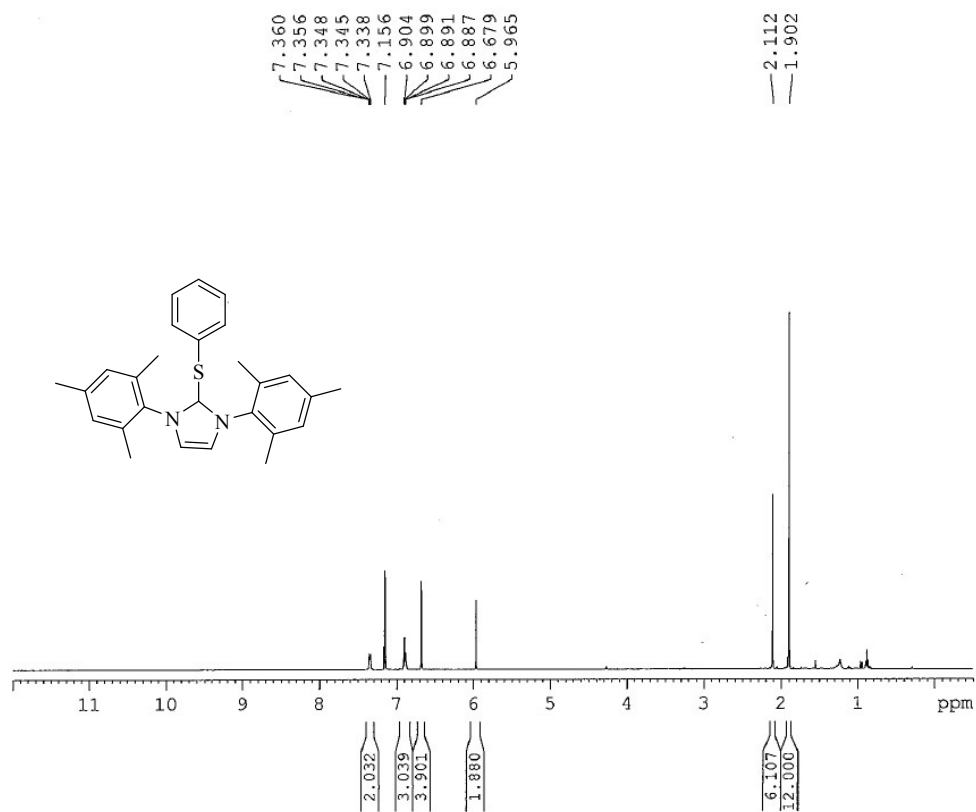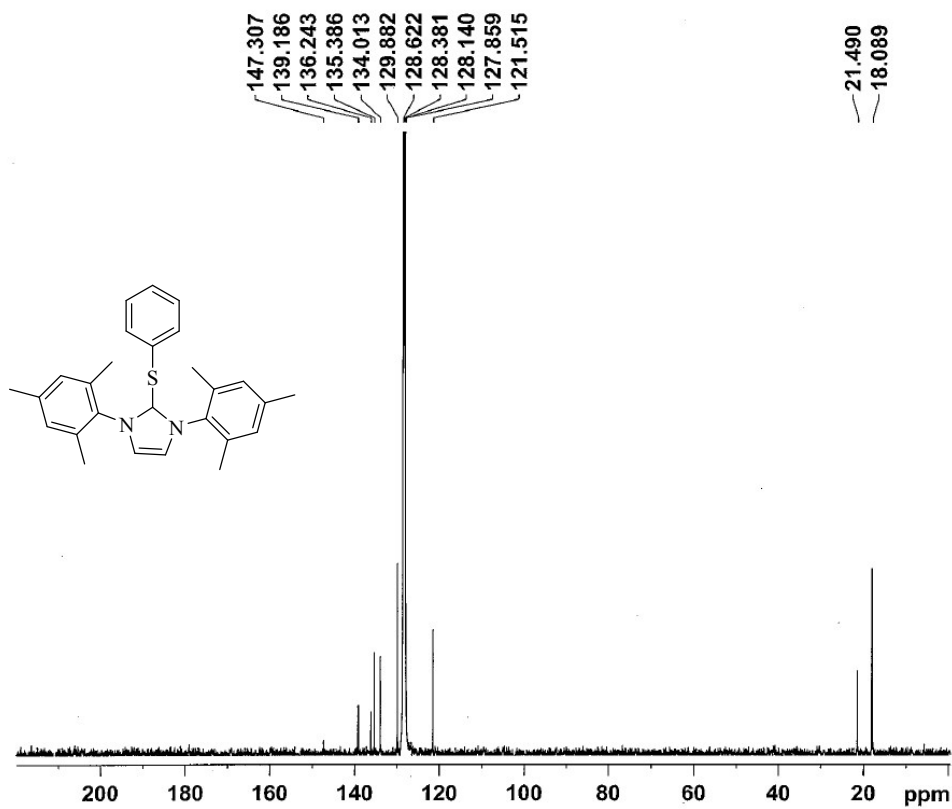

$^1\text{H}$  and  $^{13}\text{C}\{^1\text{H}\}$  NMR ( $\text{CDCl}_3$ ); Table 2, entry 1

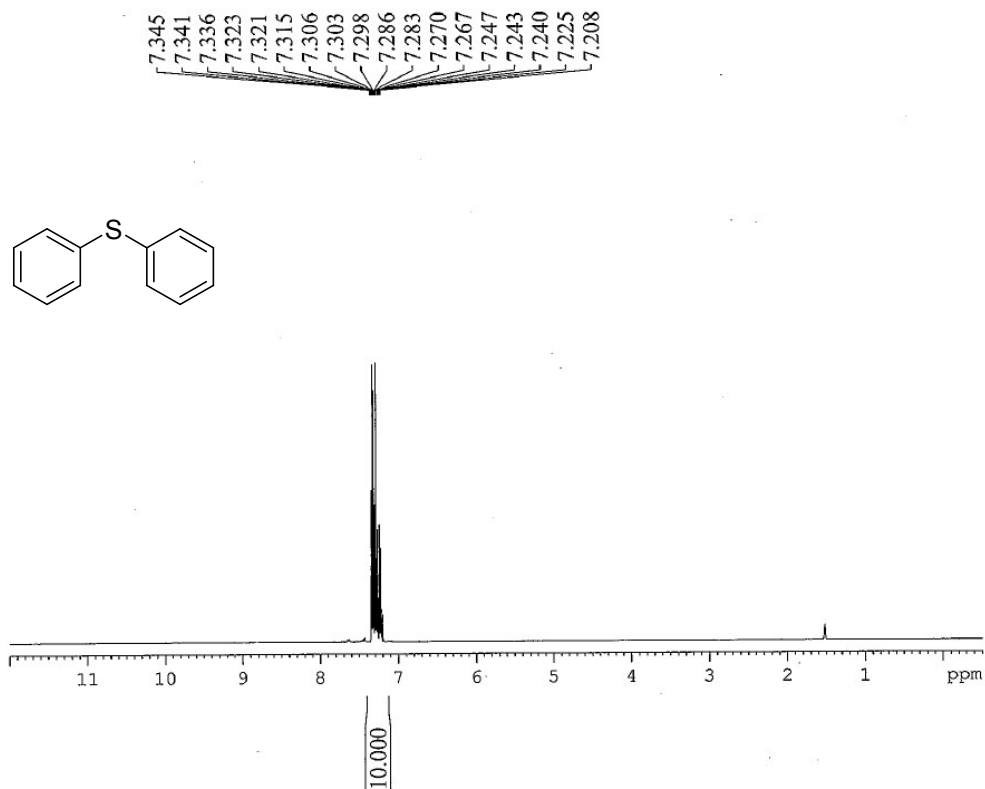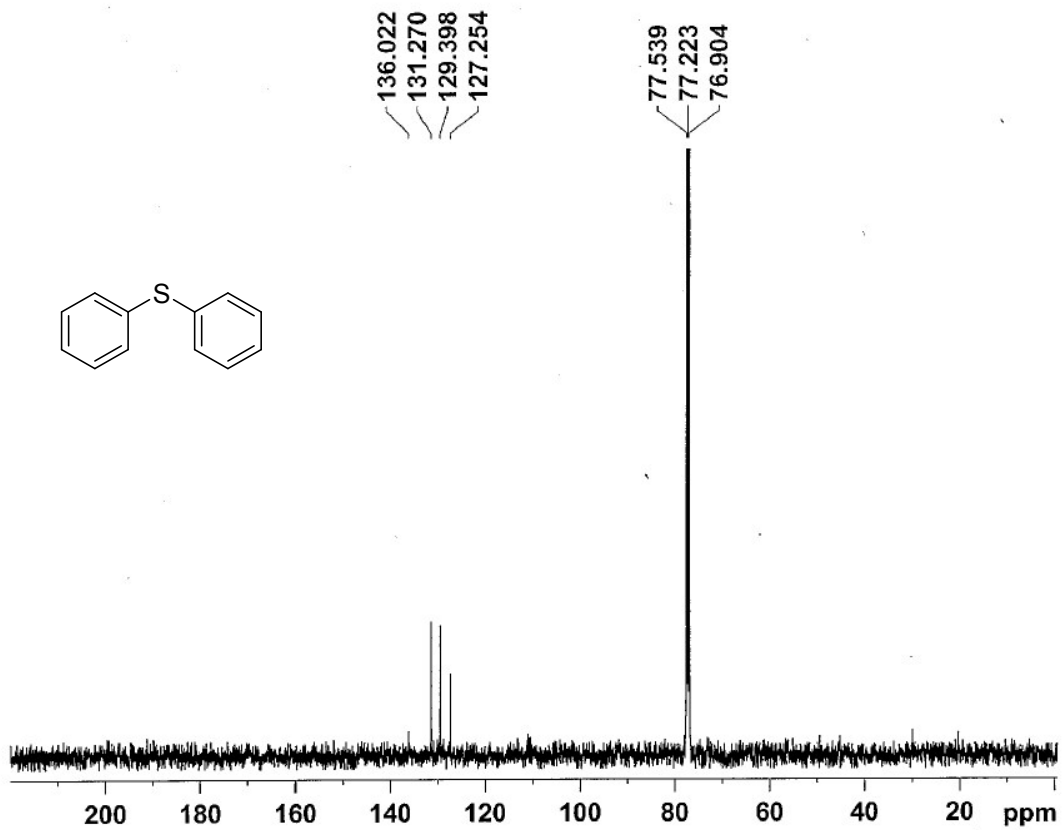

$^1\text{H}$  and  $^{13}\text{C}\{^1\text{H}\}$  NMR ( $\text{CDCl}_3$ ); Table 2, entry 2

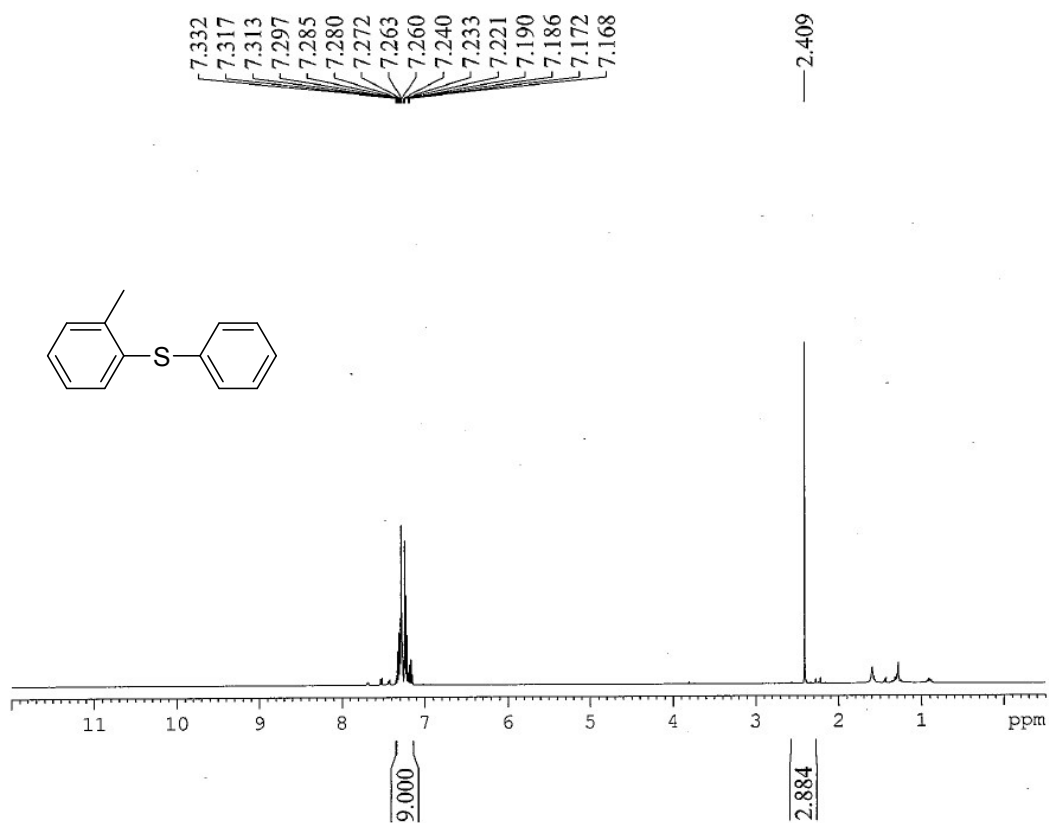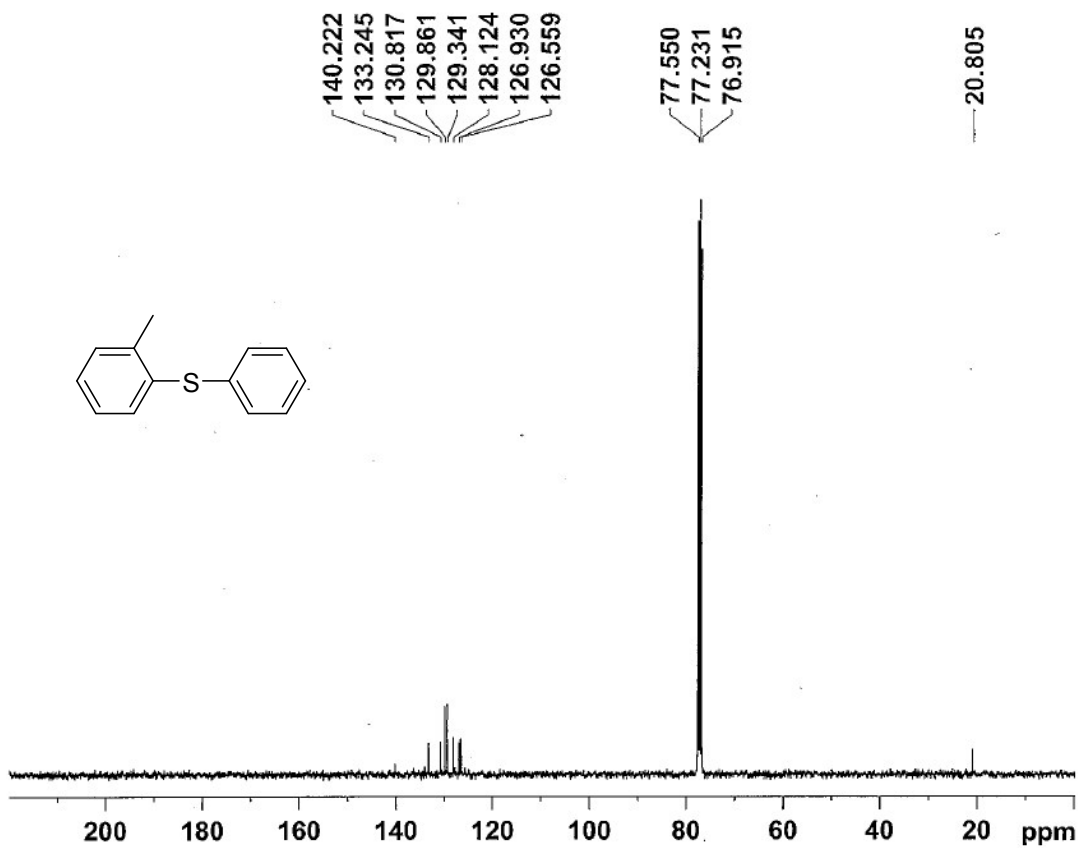



$^1\text{H}$  and  $^{13}\text{C}\{^1\text{H}\}$  NMR ( $\text{CDCl}_3$ ); Table 1, entry 3

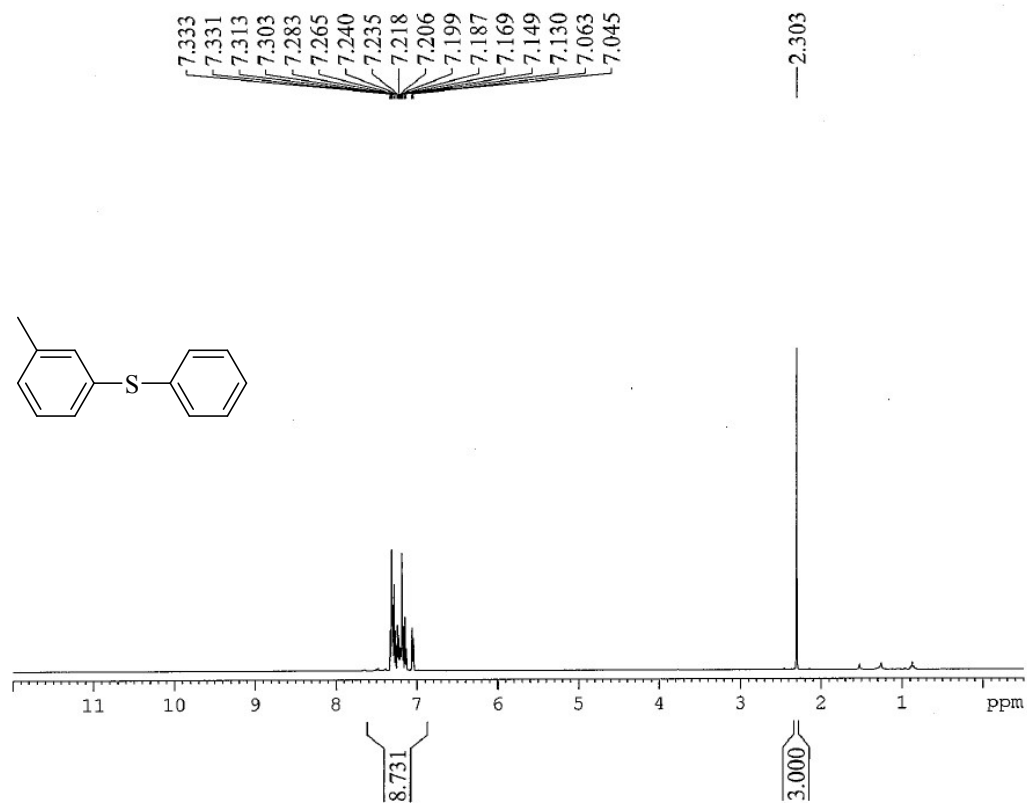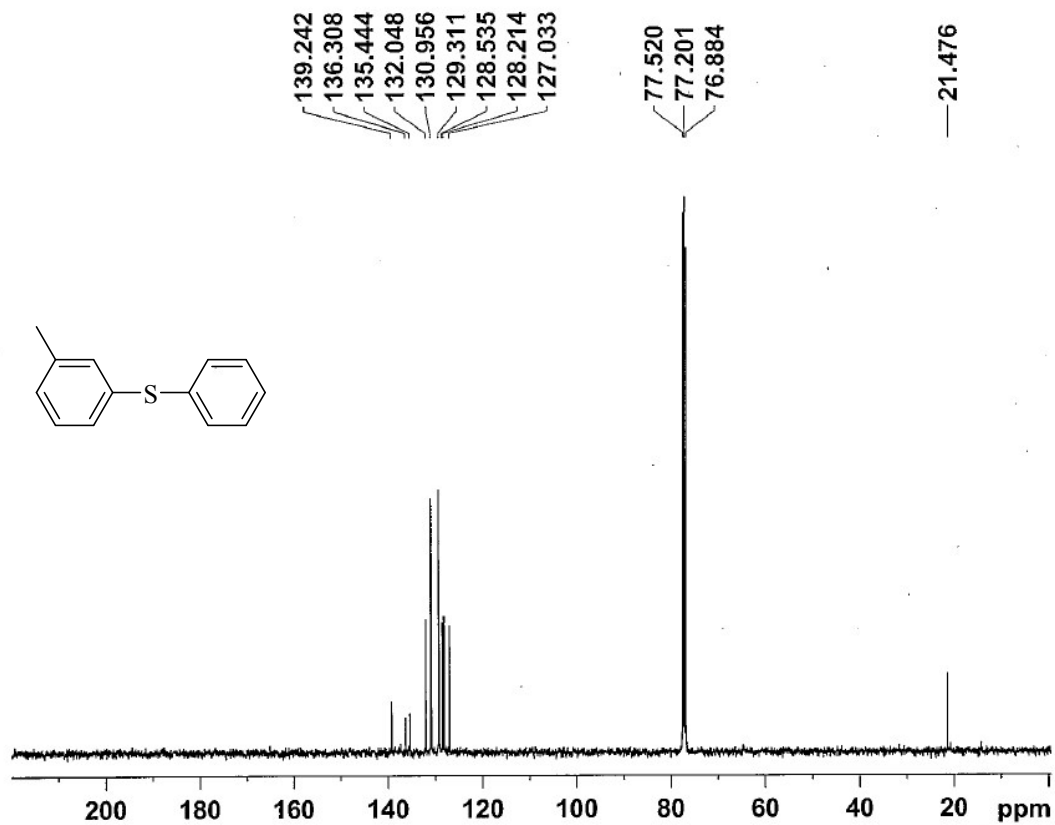

$^1\text{H}$  and  $^{13}\text{C}\{^1\text{H}\}$  NMR ( $\text{CDCl}_3$ ); Table 2, entry 4

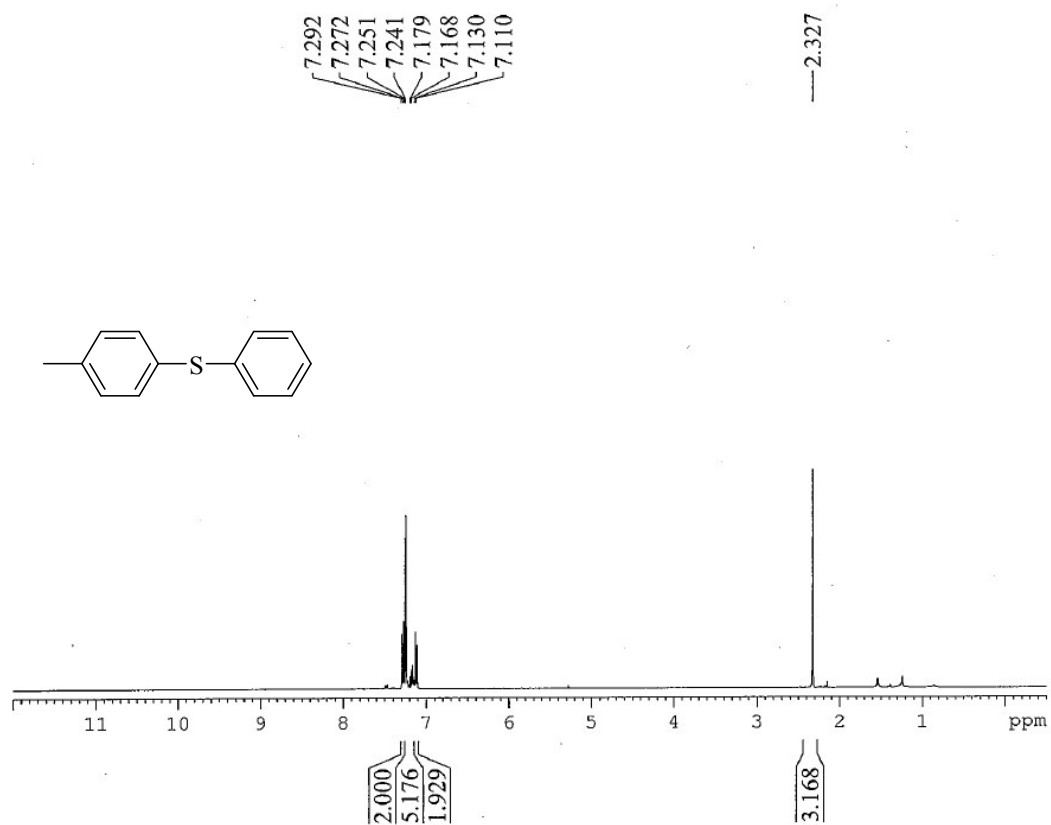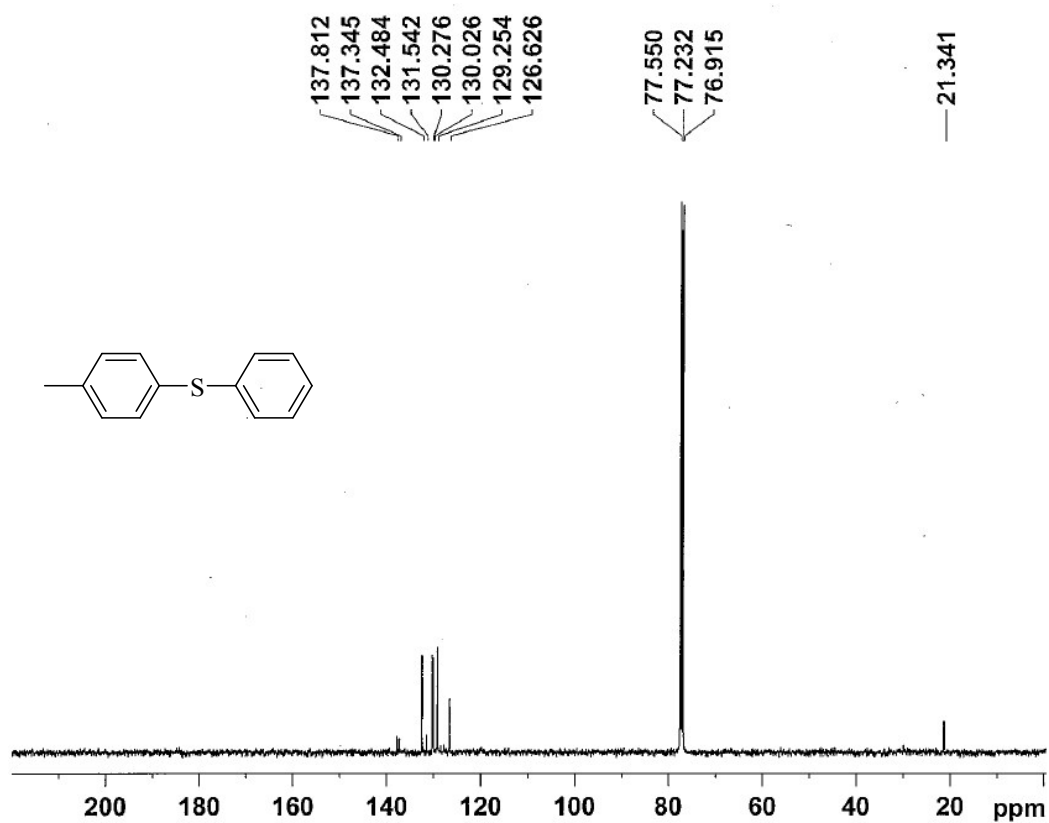

**$^1\text{H}$  and  $^{13}\text{C}\{^1\text{H}\}$  NMR ( $\text{CDCl}_3$ ); Table 2, entry 5**

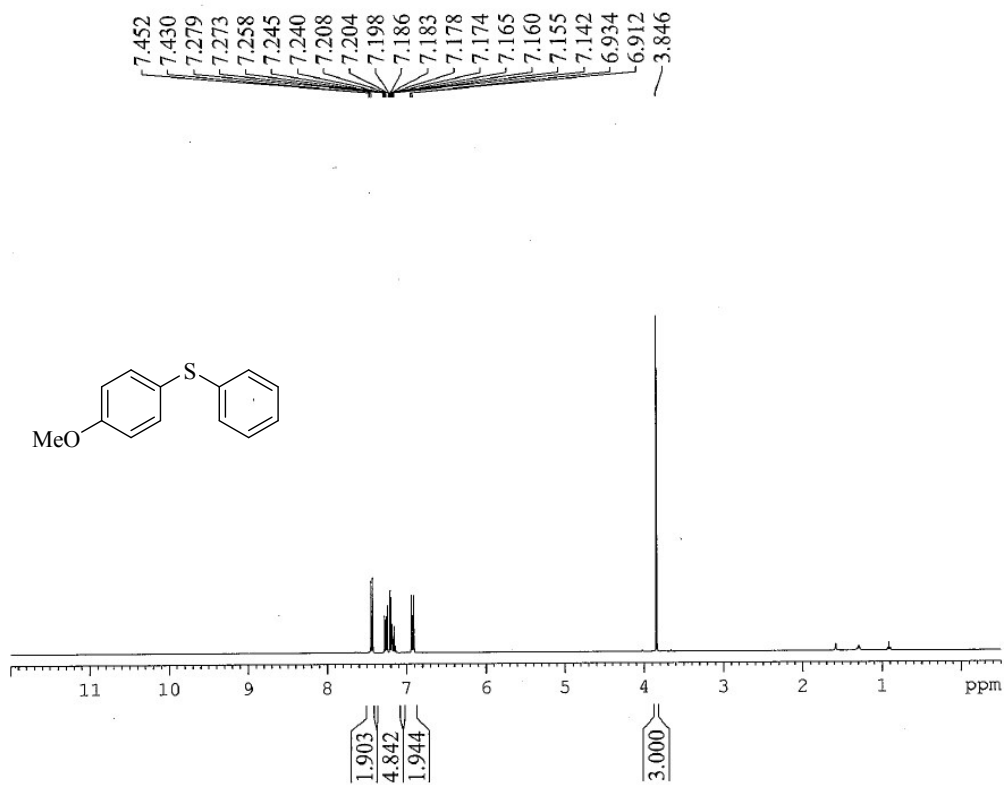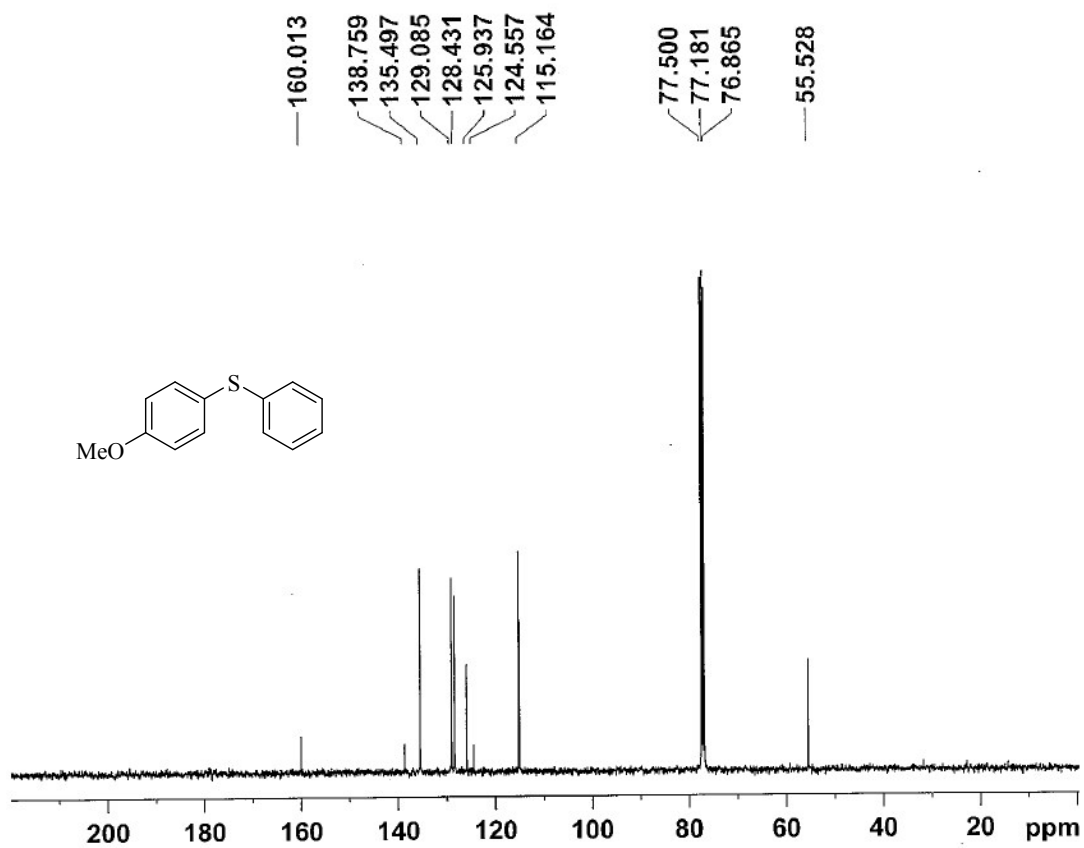

$^1\text{H}$  and  $^{13}\text{C}\{^1\text{H}\}$  NMR ( $\text{CDCl}_3$ ); Table 2, entry 6

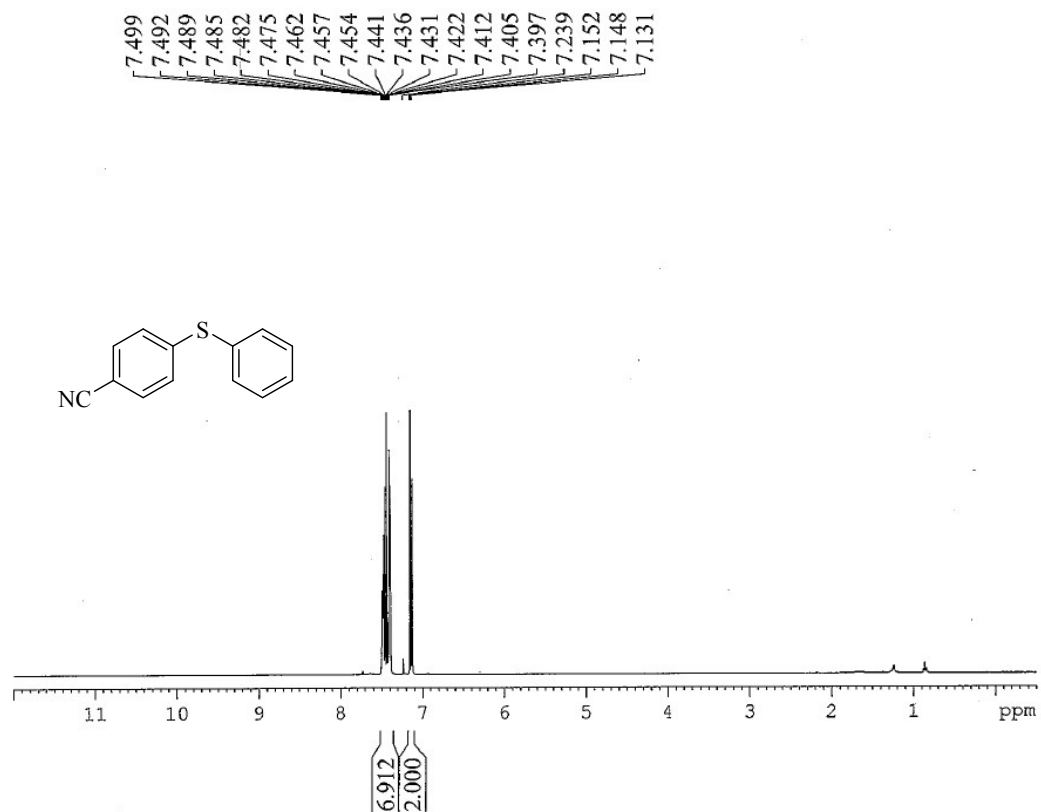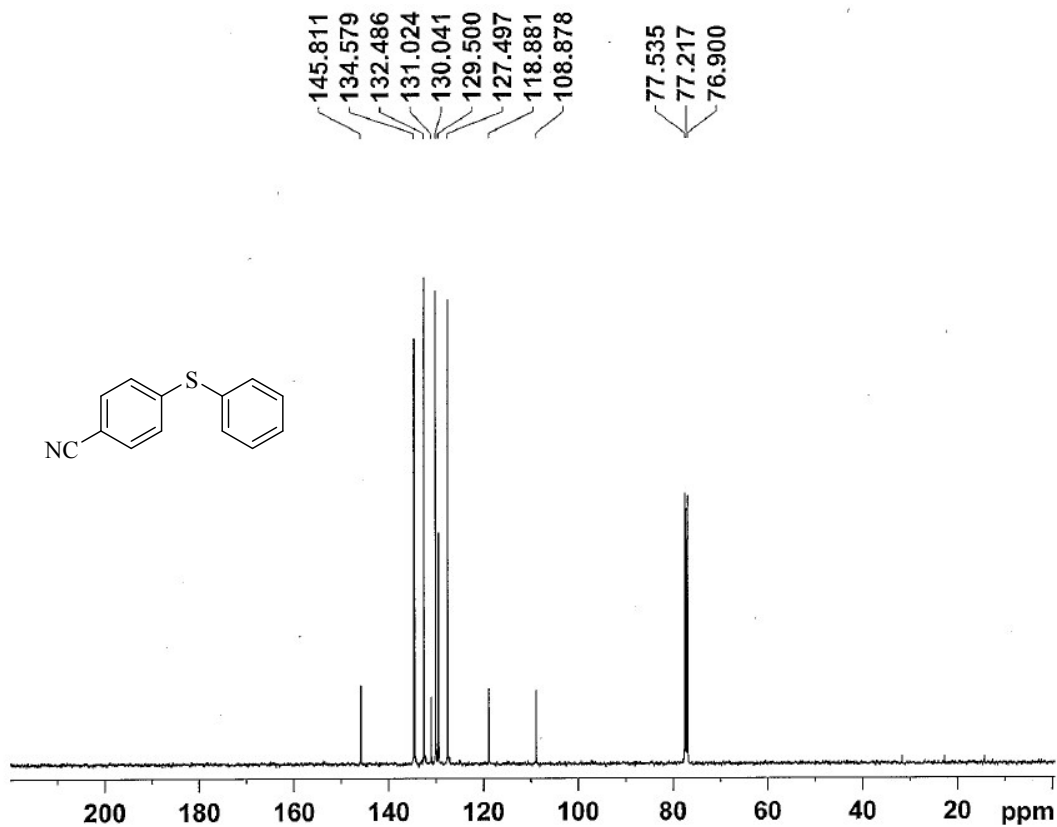

$^1\text{H}$  and  $^{13}\text{C}\{^1\text{H}\}$  NMR ( $\text{CDCl}_3$ ); Table 2, entry 7

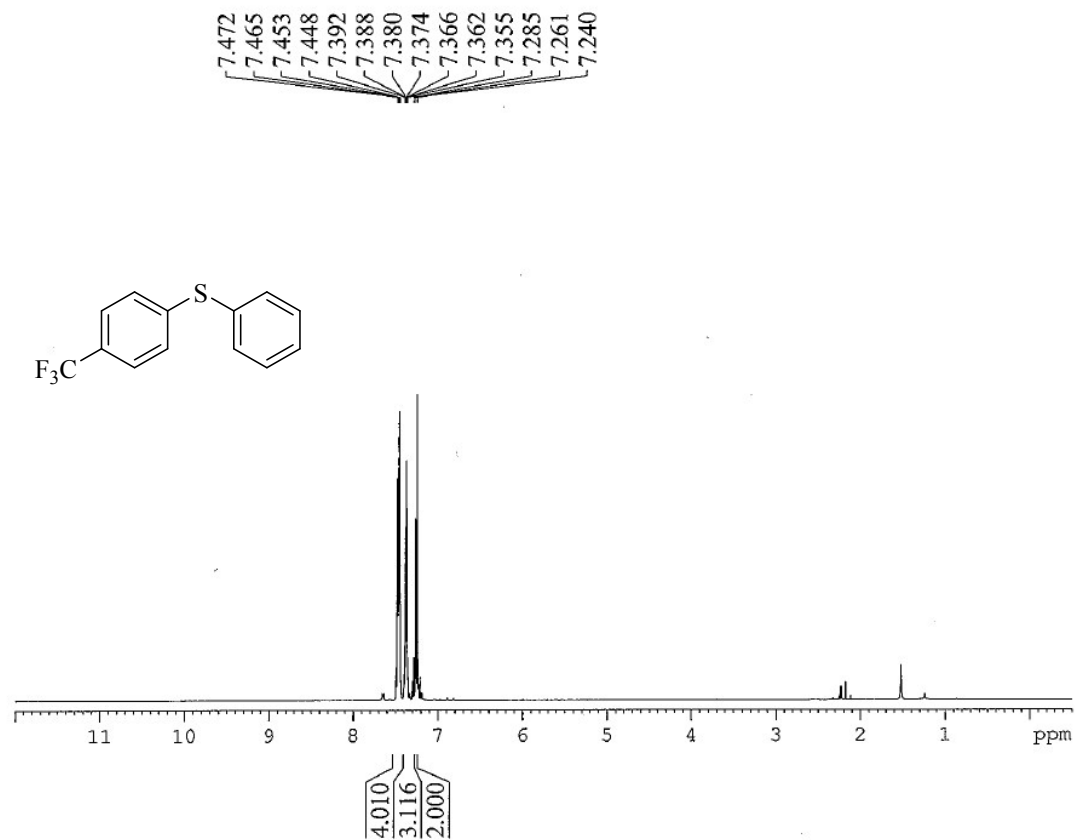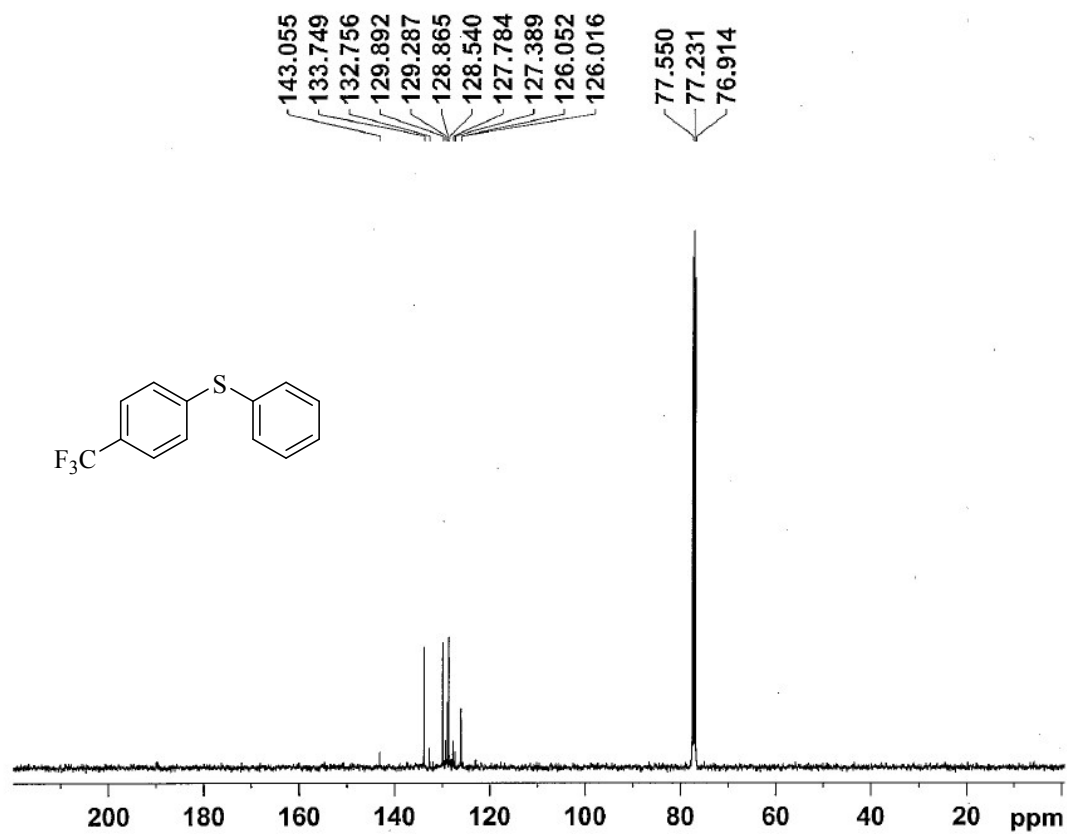

**<sup>1</sup>H and <sup>13</sup>C{<sup>1</sup>H} NMR (CDCl<sub>3</sub>); Table 2, entry 8**

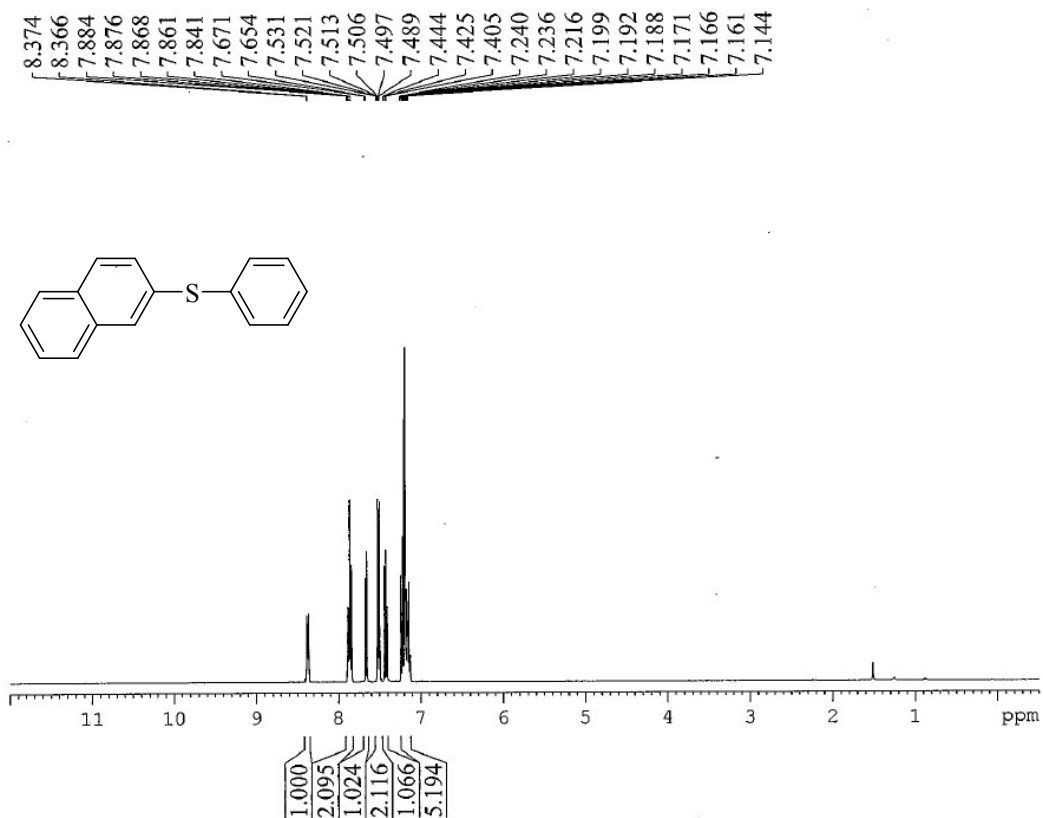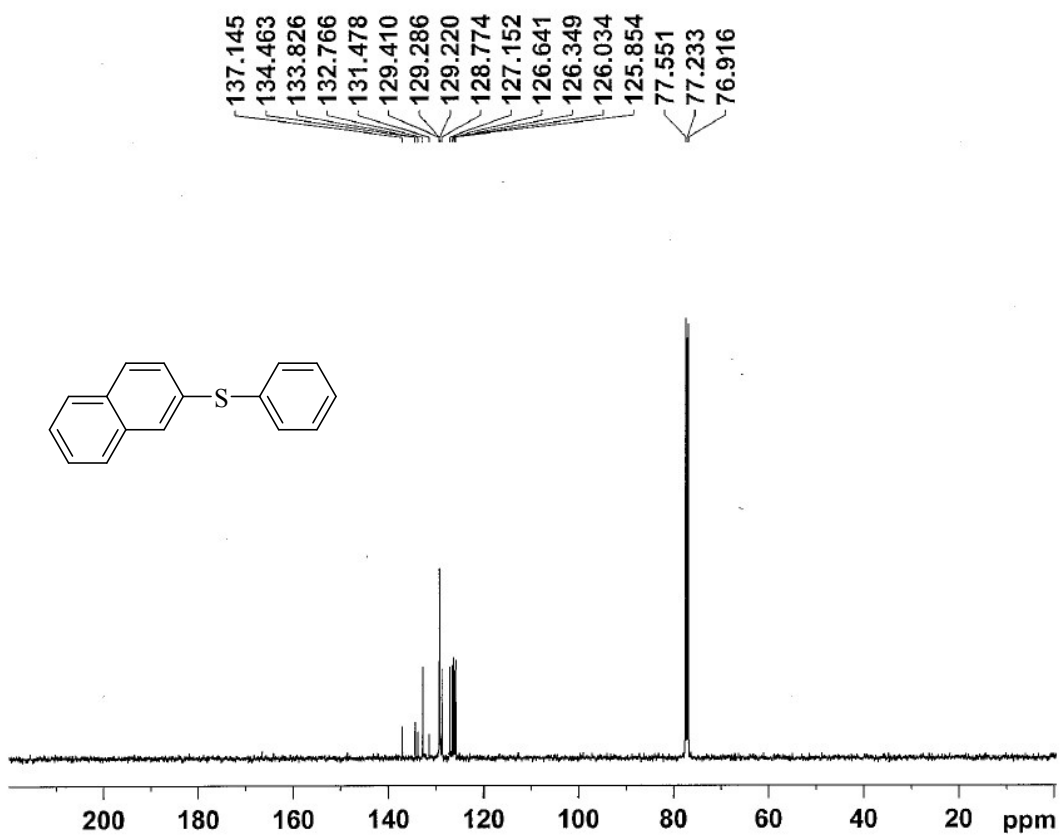

## GC Data

Table 1, entry 1; HP-1 capillary column was used

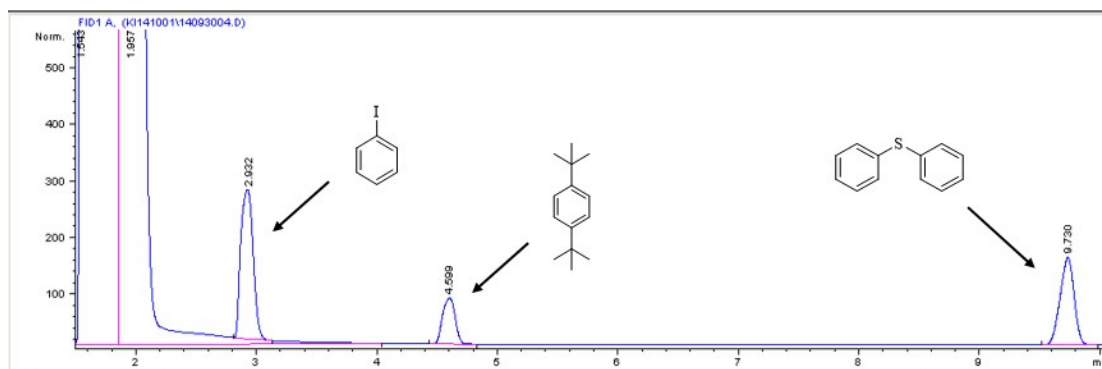

| # | Time  | Area    | Height   | Width  | Area%  | Symmetry |
|---|-------|---------|----------|--------|--------|----------|
| 1 | 1.543 | 1697268 | 276613.9 | 0.0736 | 95.835 | 6.59E-2  |
| 2 | 1.957 | 70043.6 | 7723.9   | 0.1511 | 3.955  | 0.886    |
| 3 | 2.932 | 1886.2  | 264.1    | 0.1183 | 0.107  | 1.084    |
| 4 | 4.599 | 583.9   | 81.3     | 0.1177 | 0.033  | 1.173    |
| 5 | 9.73  | 1247.3  | 155.1    | 0.1198 | 0.070  | 1.159    |

The yield (24%) of diphenyl sulfide was calculated with the internal standard 1,4-di-*tert*-butylbenzene (iodobenzene/internal standard = 10 and product response factor = 1.11).

**Table 1, entry 2 (no radical scavenger); HP-1 capillary column was used**

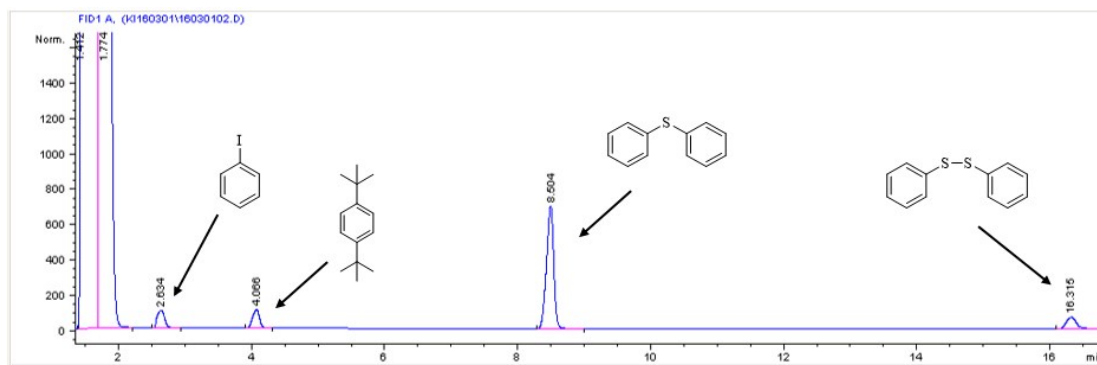

| # | Time   | Area      | Height   | Width  | Area%  | Symmetry |
|---|--------|-----------|----------|--------|--------|----------|
| 1 | 1.412  | 2372735.3 | 393356.5 | 0.0754 | 96.035 | 8.52E-2  |
| 2 | 1.774  | 90564.4   | 9593.3   | 0.1573 | 3.666  | 0.861    |
| 3 | 2.634  | 726.3     | 97.6     | 0.1118 | 0.029  | 1.143    |
| 4 | 4.066  | 732.1     | 104.9    | 0.1054 | 0.030  | 1.256    |
| 5 | 8.504  | 5249.3    | 692.8    | 0.1134 | 0.212  | 1.227    |
| 6 | 16.315 | 694.4     | 66.5     | 0.1479 | 0.028  | 0.887    |

The yield (81%) of product diphenyl sulfide was calculated with the internal standard 1,4-di-*tert*-butylbenzene (iodobenzene/internal standard = 10 and product response factor = 1.13).



**Table 1, entry 2 (TEMPO as radical scavenger); HP-1 capillary column was used**

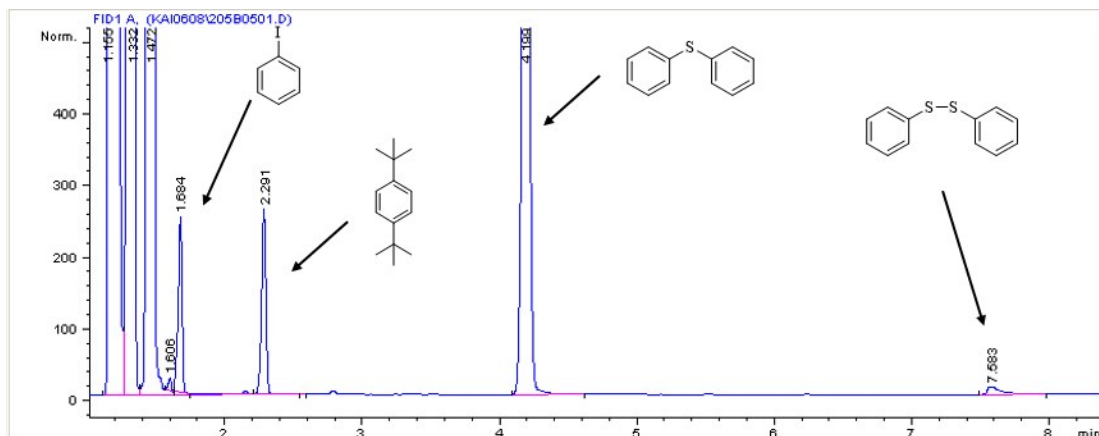

| # | Time  | Area     | Height   | Width  | Area%  | Symmetry |
|---|-------|----------|----------|--------|--------|----------|
| 1 | 1.155 | 459801.4 | 147643.3 | 0.0393 | 87.308 | 0.169    |
| 2 | 1.332 | 32422.3  | 13173.4  | 0.0357 | 6.156  | 2.031    |
| 3 | 1.472 | 28770.2  | 13720    | 0.0305 | 5.463  | 1.55     |
| 4 | 1.606 | 29       | 17.6     | 0.0252 | 0.006  | 1.195    |
| 5 | 1.684 | 498.2    | 245.3    | 0.0307 | 0.095  | 1.399    |
| 6 | 2.291 | 576.3    | 258.4    | 0.035  | 0.109  | 1.113    |
| 7 | 4.199 | 4470.8   | 1363.2   | 0.0513 | 0.849  | 1.071    |
| 8 | 7.583 | 75.6     | 11       | 0.0953 | 0.014  | 0.309    |

The yield (86%) of product diphenyl sulfide was calculated with the internal standard 1,4-di-*tert*-butylbenzene (iodobenzene/internal standard = 10 and product response factor = 1.11).

**Table 1, entry 2 (cumene as radical scavenger); HP-1 capillary column was used**

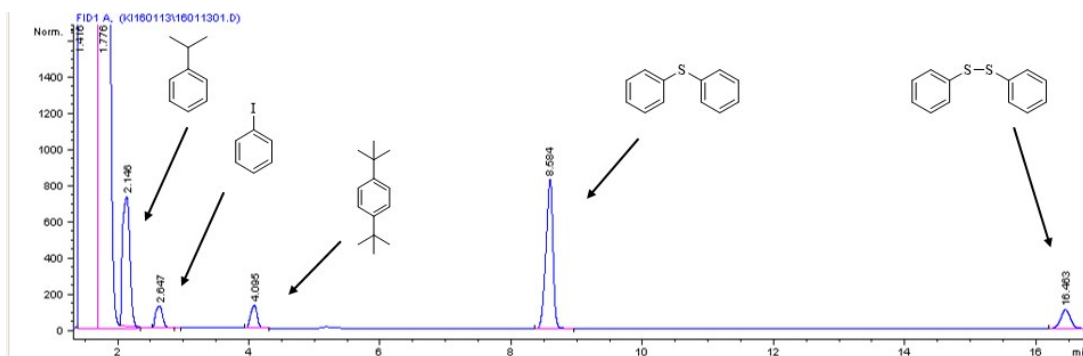

| # | Time   | Area     | Height   | Width  | Area%  | Symmetry |
|---|--------|----------|----------|--------|--------|----------|
| 1 | 1.416  | 2422032  | 394776.7 | 0.0816 | 95.079 | 8.08E-2  |
| 2 | 1.776  | 110928.7 | 11699.9  | 0.158  | 4.355  | 0.776    |
| 3 | 2.146  | 5526.9   | 713.5    | 0.1134 | 0.217  | 1.159    |
| 4 | 2.647  | 864.8    | 118.7    | 0.107  | 0.034  | 1.159    |
| 5 | 4.095  | 876.7    | 128.5    | 0.0996 | 0.034  | 1.31     |
| 6 | 8.584  | 6110.6   | 822.4    | 0.1087 | 0.240  | 1.294    |
| 7 | 16.463 | 1043.7   | 102.5    | 0.1518 | 0.041  | 1.004    |

The yield (78%) of product diphenyl sulfide was calculated with the internal standard 1,4-di-*tert*-butylbenzene (iodobenzene/internal standard = 10 and product response factor = 1.11).

**Table 1, entry 3 (in toluene); HP-1 capillary column was used**

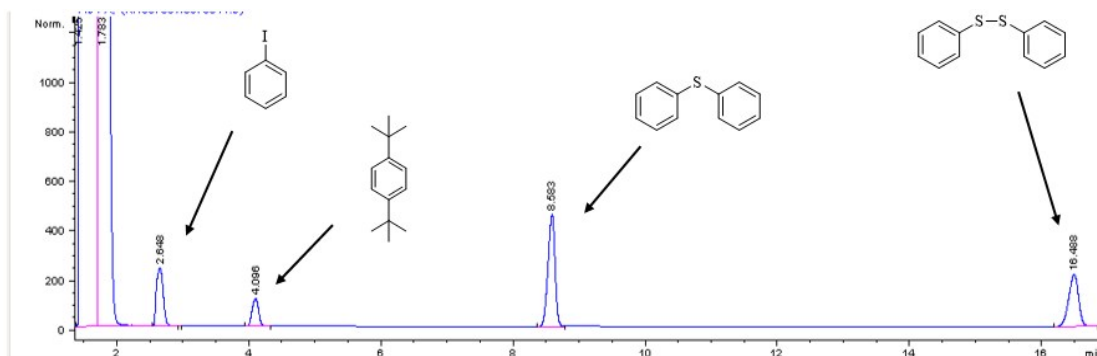

| # | Time   | Area      | Height   | Width  | Area%  | Symmetry |
|---|--------|-----------|----------|--------|--------|----------|
| 1 | 1.425  | 2221728.5 | 364058.1 | 0.0752 | 95.758 | 7.97E-2  |
| 2 | 1.783  | 90494.4   | 9972     | 0.1512 | 3.900  | 0.755    |
| 3 | 2.648  | 1659.2    | 234.8    | 0.1174 | 0.072  | 1.015    |
| 4 | 4.096  | 759.1     | 113.1    | 0.1123 | 0.033  | 1.139    |
| 5 | 8.583  | 3335.4    | 451.6    | 0.1142 | 0.144  | 1.275    |
| 6 | 16.488 | 2173.8    | 211.4    | 0.1499 | 0.094  | 1.242    |

The yield (48%) of product diphenyl sulfide was calculated with the internal standard 1,4-di-*tert*-butylbenzene (iodobenzene/internal standard = 10 and product response factor = 1.11).

**Table 1, entry 3 (in DMF); DB-5MS capillary column was used**

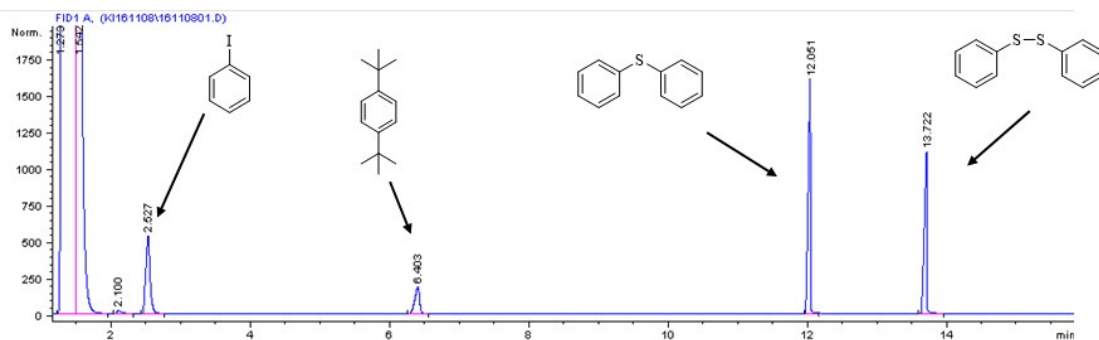

| # | Time   | Area    | Height | Width  | Area%  | Symmetry |
|---|--------|---------|--------|--------|--------|----------|
| 1 | 1.273  | 2026076 | 474510 | 0.0513 | 97.949 | 0.118    |
| 2 | 1.542  | 32886.2 | 7441.8 | 0.0737 | 1.590  | 1.363    |
| 3 | 2.1    | 79.7    | 17.2   | 0.065  | 0.004  | 0.454    |
| 4 | 2.527  | 2274.7  | 529.2  | 0.0601 | 0.110  | 1.042    |
| 5 | 6.403  | 889.4   | 185.6  | 0.0652 | 0.043  | 1.796    |
| 6 | 12.051 | 3502.4  | 1597.8 | 0.0278 | 0.169  | 5.333    |
| 7 | 13.722 | 2790    | 1109.5 | 0.0318 | 0.135  | 5.065    |

The yield (39%) of product diphenyl sulfide was calculated with the internal standard 1,4-di-*tert*-butylbenzene (iodobenzene/internal standard = 10 and product response factor = 0.99).

**Table 1, entry 4; HP-1 capillary column was used**

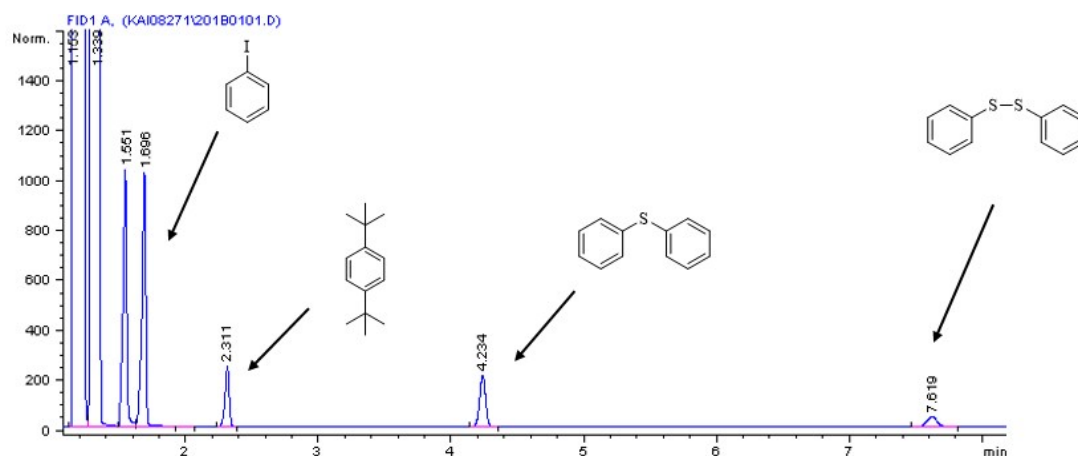

| # | Time  | Area     | Height  | Width  | Area%  | Symmetry |
|---|-------|----------|---------|--------|--------|----------|
| 1 | 1.153 | 458844.8 | 140546  | 0.0568 | 86.648 | 9.59E-2  |
| 2 | 1.339 | 65236.2  | 27302.1 | 0.0334 | 12.319 | 2.214    |
| 3 | 1.551 | 1994.1   | 1026    | 0.0284 | 0.377  | 1.389    |
| 4 | 1.696 | 2051.3   | 1018.6  | 0.0292 | 0.387  | 1.648    |
| 5 | 2.311 | 535.6    | 241.2   | 0.0337 | 0.101  | 1.234    |
| 6 | 4.234 | 656.7    | 207.2   | 0.0495 | 0.124  | 1.053    |
| 7 | 7.619 | 233.2    | 40      | 0.0885 | 0.044  | 1.035    |

The yield (14%) of product diphenyl sulfide was calculated with the internal standard 1,4-di-*tert*-butylbenzene (iodobenzene/internal standard = 10 and product response factor = 1.11).

**Table 1, entry 5; HP-1 capillary column was used**

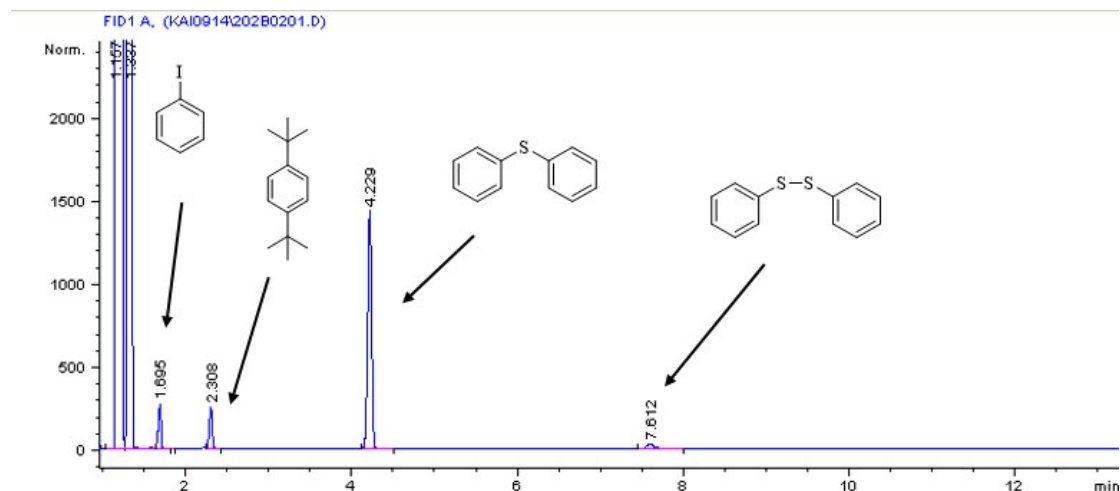

| # | Time  | Area     | Height   | Width  | Area%  | Symmetry |
|---|-------|----------|----------|--------|--------|----------|
| 1 | 1.157 | 465226.2 | 149290.4 | 0.0554 | 85.362 | 0.144    |
| 2 | 1.337 | 73614.5  | 28811.2  | 0.0388 | 13.507 | 1.867    |
| 3 | 1.695 | 604.2    | 268.1    | 0.0343 | 0.111  | 1.607    |
| 4 | 2.308 | 598.7    | 245.8    | 0.0374 | 0.110  | 1.212    |
| 5 | 4.229 | 4775.8   | 1430.9   | 0.0529 | 0.876  | 1.089    |
| 6 | 7.612 | 186.4    | 28.1     | 0.1015 | 0.034  | 0.75     |

The yield (89%) of product diphenyl sulfide was calculated with the internal standard 1,4-di-*tert*-butylbenzene (iodobenzene/internal standard = 10 and product response factor = 1.11).

**Table 1, entry 6; HP-1 capillary column was used**

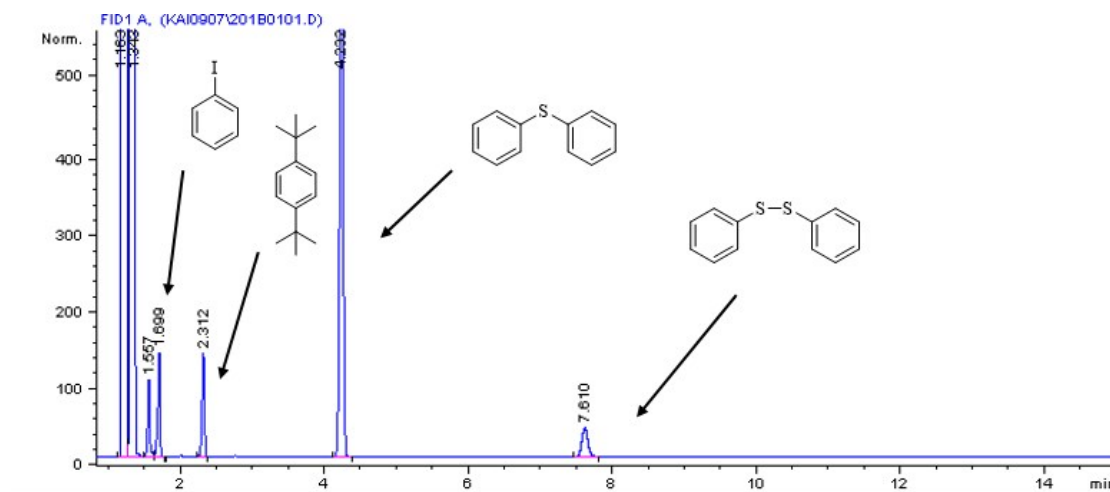

| # | Time  | Area     | Height   | Width  | Area%  | Symmetry |
|---|-------|----------|----------|--------|--------|----------|
| 1 | 1.163 | 458232.8 | 132966.3 | 0.0577 | 91.809 | 0.236    |
| 2 | 1.343 | 37581.5  | 14781    | 0.0379 | 7.530  | 2.127    |
| 3 | 1.557 | 200.8    | 101.3    | 0.0299 | 0.040  | 1.116    |
| 4 | 1.699 | 289.8    | 136.3    | 0.0323 | 0.058  | 1.642    |
| 5 | 2.312 | 302.7    | 134      | 0.0344 | 0.061  | 1.209    |
| 6 | 4.232 | 2290.7   | 711.6    | 0.0506 | 0.459  | 1.062    |
| 7 | 7.61  | 219.7    | 37.5     | 0.0869 | 0.044  | 0.922    |

The yield (84%) of product diphenyl sulfide was calculated with the internal standard 1,4-di-*tert*-butylbenzene (iodobenzene/internal standard = 10 and product response factor = 1.11).

Table 1, entry7; HP-1 capillary column was used

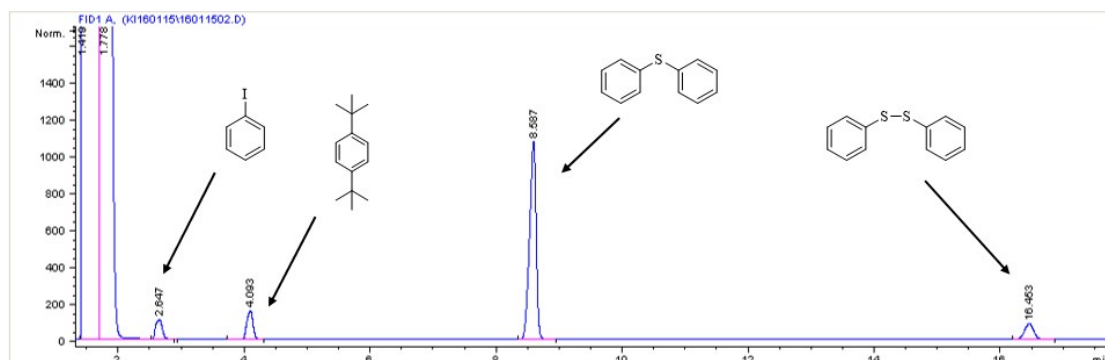

| # | Time   | Area      | Height   | Width  | Area%  | Symmetry |
|---|--------|-----------|----------|--------|--------|----------|
| 1 | 1.419  | 2332839.2 | 388146.7 | 0.0741 | 94.130 | 8.66E-2  |
| 2 | 1.778  | 135112.1  | 15031.6  | 0.1498 | 5.452  | 0.789    |
| 3 | 2.647  | 735.7     | 103.2    | 0.1022 | 0.030  | 1.23     |
| 4 | 4.093  | 1037.1    | 154.8    | 0.1102 | 0.042  | 1.358    |
| 5 | 8.587  | 7739.6    | 1073.2   | 0.1061 | 0.312  | 1.491    |
| 6 | 16.453 | 865.4     | 85.3     | 0.1293 | 0.035  | 0.935    |

The yield (83%) of product diphenyl sulfide was calculated with the internal standard 1,4-di-*tert*-butylbenzene (iodobenzene/internal standard = 10 and product response factor = 1.11).



**Table 2, entry 1 (in DMF); DB-5MS capillary column was used**

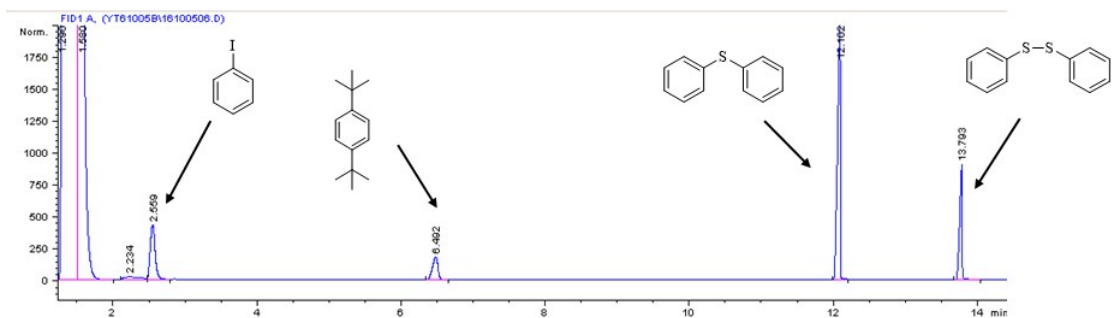

| # | Time   | Area      | Height   | Width  | Area%  | Symmetry |
|---|--------|-----------|----------|--------|--------|----------|
| 1 | 1.29   | 1753662.6 | 451652.5 | 0.0473 | 97.149 | 5.53E-2  |
| 2 | 1.58   | 40626.7   | 7670.8   | 0.0883 | 2.251  | 2.014    |
| 3 | 2.234  | 358.1     | 22.1     | 0.1906 | 0.020  | 0.48     |
| 4 | 2.559  | 2086.3    | 428.6    | 0.075  | 0.116  | 0.872    |
| 5 | 6.492  | 959.9     | 181.8    | 0.0786 | 0.053  | 1.639    |
| 6 | 12.102 | 5286.4    | 2080.2   | 0.0331 | 0.293  | 5.832    |
| 7 | 13.793 | 2137.8    | 900.4    | 0.0317 | 0.118  | 3.984    |

The yield (55%) of product diphenyl sulfide was calculated with the internal standard 1,4-di-*tert*-butylbenzene (iodobenzene/internal standard = 10 and product response factor = 0.99).

**Table 2, entry2 (in toluene); HP-1 capillary column was used**

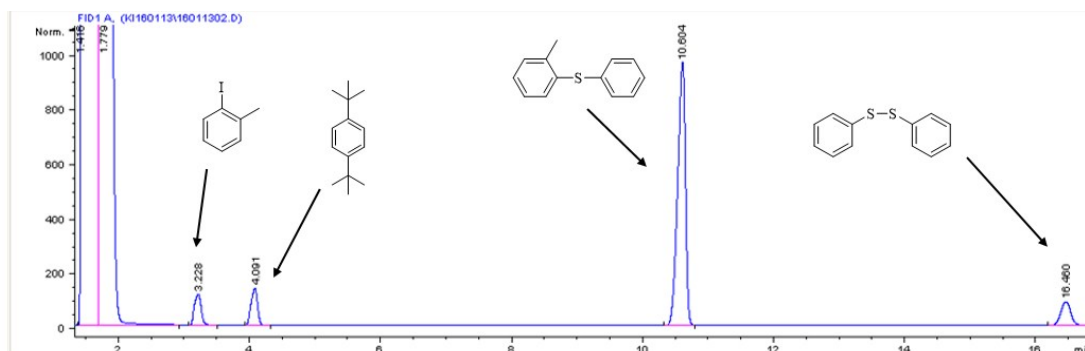

| # | Time   | Area      | Height  | Width  | Area%  | Symmetry |
|---|--------|-----------|---------|--------|--------|----------|
| 1 | 1.416  | 2430979.7 | 406745  | 0.0747 | 94.839 | 7.41E-2  |
| 2 | 1.779  | 121713.3  | 12858.7 | 0.1578 | 4.748  | 0.839    |
| 3 | 3.228  | 798.2     | 111.7   | 0.1024 | 0.031  | 1.205    |
| 4 | 4.091  | 915.4     | 134.4   | 0.0984 | 0.036  | 1.295    |
| 5 | 10.604 | 7953.2    | 962.3   | 0.1214 | 0.310  | 1.604    |
| 6 | 16.46  | 907.4     | 86.7    | 0.1341 | 0.035  | 1.174    |

The yield (94%) of product 2-methylphenyl phenyl sulfide was calculated with the internal standard 1,4-di-*tert*-butylbenzene (2-iodotoluene/internal standard = 10 and product response factor = 1.08).

Table 2, entry 2 (in DMF); DB-5MS capillary column was used

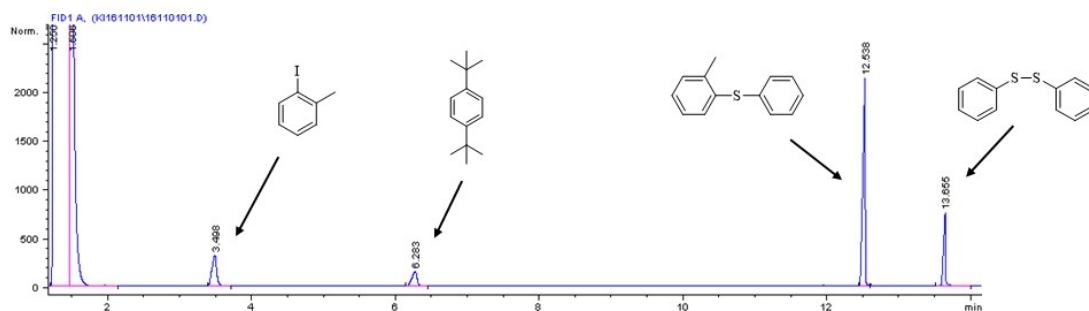

| # | Time   | Area    | Height   | Width  | Area%  | Symmetry |
|---|--------|---------|----------|--------|--------|----------|
| 1 | 1.25   | 2190516 | 520263.6 | 0.0504 | 98.501 | 0.152    |
| 2 | 1.506  | 24655.6 | 6298.6   | 0.0652 | 1.109  | 0.829    |
| 3 | 3.498  | 1458.6  | 321.3    | 0.0607 | 0.066  | 1.444    |
| 4 | 6.283  | 769.6   | 155.5    | 0.0678 | 0.035  | 1.605    |
| 5 | 12.538 | 4872.5  | 2138.9   | 0.0288 | 0.219  | 5.406    |
| 6 | 13.655 | 1569.7  | 757.7    | 0.0277 | 0.071  | 2.905    |

The yield (61%) of product 2-methylphenyl phenyl sulfide was calculated with the internal standard 1,4-di-*tert*-butylbenzene (2-iodotoluene/internal standard = 10 and product response factor = 0.96).

Table 2, entry3 (in toluene); HP-1 capillary column was used

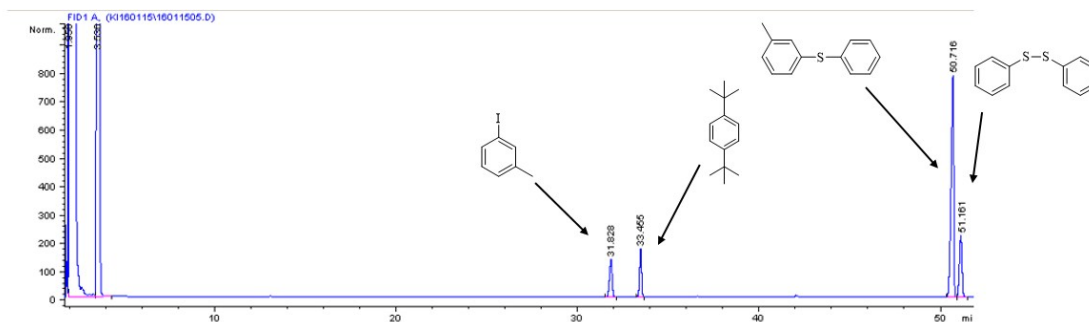

| # | Time   | Area      | Height  | Width  | Area%  | Symmetry |
|---|--------|-----------|---------|--------|--------|----------|
| 1 | 1.956  | 2168154.8 | 223299  | 0.1618 | 92.533 | 5.81E-2  |
| 2 | 3.536  | 162230.6  | 22187.4 | 0.1183 | 6.924  | 0.421    |
| 3 | 31.828 | 1376.1    | 131.8   | 0.1288 | 0.059  | 1.562    |
| 4 | 33.455 | 1253      | 168.2   | 0.1029 | 0.053  | 1.119    |
| 5 | 50.716 | 8038.7    | 780.2   | 0.1372 | 0.343  | 2.278    |
| 6 | 51.161 | 2067      | 215.4   | 0.1259 | 0.088  | 1.417    |

The yield (69%) of product 3-methylphenyl phenyl sulfide was calculated with the internal standard 1,4-di-*tert*-butylbenzene (3-iodotoluene/internal standard = 10 and product response factor = 1.08).

**Table 2, entry3 (in DMF); DB-5MS capillary column was used**

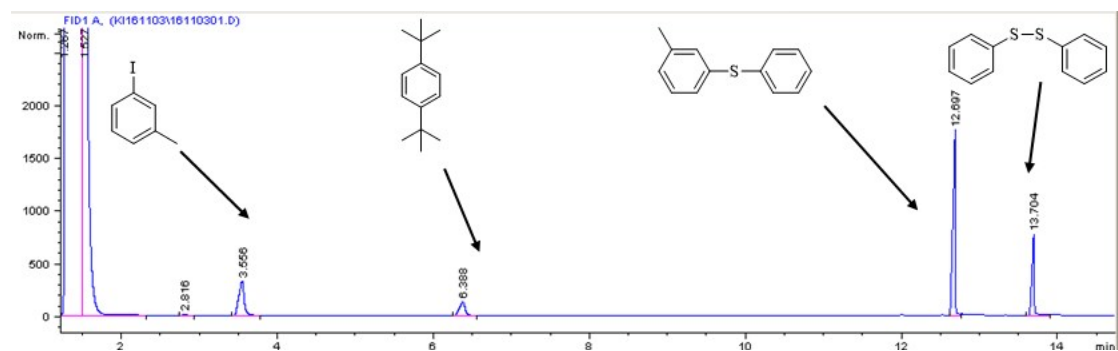

| # | Time   | Area      | Height   | Width  | Area%  | Symmetry |
|---|--------|-----------|----------|--------|--------|----------|
| 1 | 1.267  | 2244226.7 | 531933.4 | 0.054  | 98.725 | 0.105    |
| 2 | 1.527  | 21243.5   | 6082.6   | 0.0582 | 0.935  | 0.472    |
| 3 | 2.816  | 11.2      | 2.6      | 0.0586 | 0.000  | 0.869    |
| 4 | 3.556  | 1520      | 325.9    | 0.0639 | 0.067  | 1.435    |
| 5 | 6.388  | 635.8     | 125.5    | 0.0708 | 0.028  | 1.499    |
| 6 | 12.697 | 3958.4    | 1751.9   | 0.0289 | 0.174  | 4.968    |
| 7 | 13.704 | 1617.5    | 765.6    | 0.0281 | 0.071  | 2.961    |

The yield (60%) of product 3-methylphenyl phenyl sulfide was calculated with the internal standard 1,4-di-*tert*-butylbenzene (3-iodotoluene/internal standard = 10 and product response factor = 0.96).

**Table 2, entry 4 (in toluene); HP-1 capillary column was used**

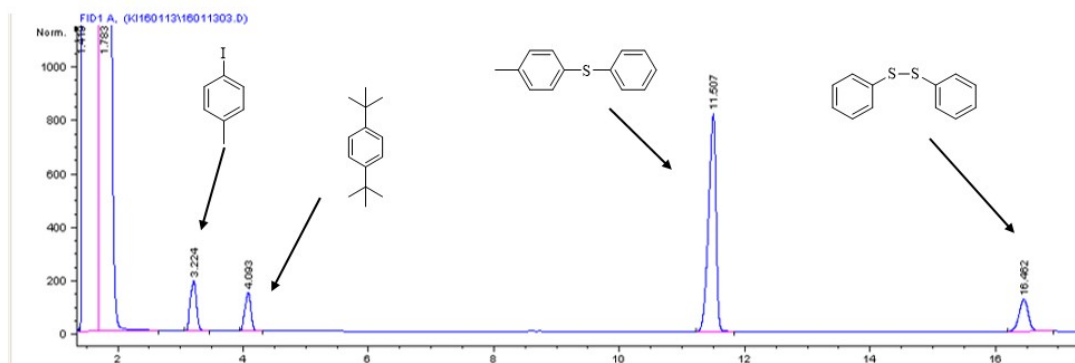

| # | Time   | Area      | Height   | Width  | Area%  | Symmetry |
|---|--------|-----------|----------|--------|--------|----------|
| 1 | 1.419  | 2393249.7 | 392754.9 | 0.0781 | 94.688 | 8.34E-2  |
| 2 | 1.783  | 124116.3  | 13290.1  | 0.1557 | 4.911  | 0.902    |
| 3 | 3.224  | 1278.1    | 186.6    | 0.0979 | 0.051  | 1.262    |
| 4 | 4.093  | 958.8     | 143.6    | 0.0969 | 0.038  | 1.274    |
| 5 | 11.507 | 6695.1    | 816.6    | 0.1187 | 0.265  | 1.646    |
| 6 | 16.462 | 1217      | 118.9    | 0.1484 | 0.048  | 1.076    |

The yield (75%) of product 4-methylphenyl phenyl sulfide was calculated with the internal standard 1,4-di-*tert*-butylbenzene (4-iodotoluene/internal standard = 10 and product response factor = 1.08).

Table 2, entry 4 (in DMF); DB-5MS capillary column was used

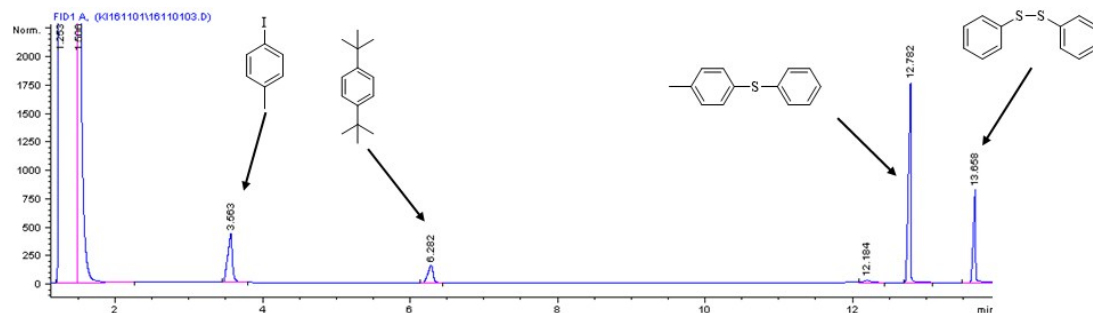

| # | Time   | Area      | Height   | Width  | Area%  | Symmetry |
|---|--------|-----------|----------|--------|--------|----------|
| 1 | 1.253  | 2248564.5 | 552399.6 | 0.0485 | 98.590 | 0.214    |
| 2 | 1.506  | 23689.3   | 6347.2   | 0.0622 | 1.039  | 0.626    |
| 3 | 3.563  | 1892.5    | 427.6    | 0.0611 | 0.083  | 1.765    |
| 4 | 6.282  | 751.3     | 154.8    | 0.0691 | 0.033  | 1.659    |
| 5 | 12.184 | 131.3     | 20       | 0.0805 | 0.006  | 0.838    |
| 6 | 12.782 | 3903.3    | 1761.2   | 0.0289 | 0.171  | 4.745    |
| 7 | 13.658 | 1784.4    | 817.5    | 0.03   | 0.078  | 2.637    |

The yield (50%) of product 4-methylphenyl phenyl sulfide was calculated with the internal standard 1,4-di-*tert*-butylbenzene (4-iodotoluene/internal standard = 10 and product response factor = 0.96).

**Table 2, entry 5; HP-1 capillary column was used**

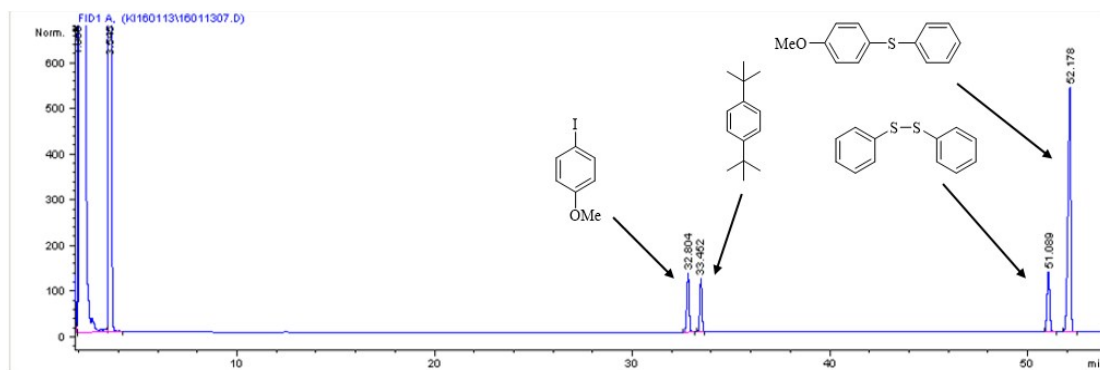

| # | Time   | Area     | Height   | Width  | Area%  | Symmetry |
|---|--------|----------|----------|--------|--------|----------|
| 1 | 1.908  | 2841.1   | 2722.6   | 0.0162 | 0.123  | 0.789    |
| 2 | 1.956  | 2198618  | 225293.9 | 0.1626 | 95.057 | 6.18E-2  |
| 3 | 3.545  | 102880.4 | 13949.5  | 0.12   | 4.448  | 0.471    |
| 4 | 32.804 | 1061     | 128.9    | 0.119  | 0.046  | 1.153    |
| 5 | 33.452 | 863.6    | 116.2    | 0.1097 | 0.037  | 1.04     |
| 6 | 51.089 | 1185.1   | 131.6    | 0.1311 | 0.051  | 1.03     |
| 7 | 52.178 | 5496.7   | 535.7    | 0.1367 | 0.238  | 2.079    |

The yield (93%) of product 4-methoxyphenyl phenyl sulfide was calculated with the internal standard 1,4-di-*tert*-butylbenzene (4-iodoanisole/internal standard = 10 and product response factor = 1.47).



Table 2, entry 6; HP-1 capillary column was used

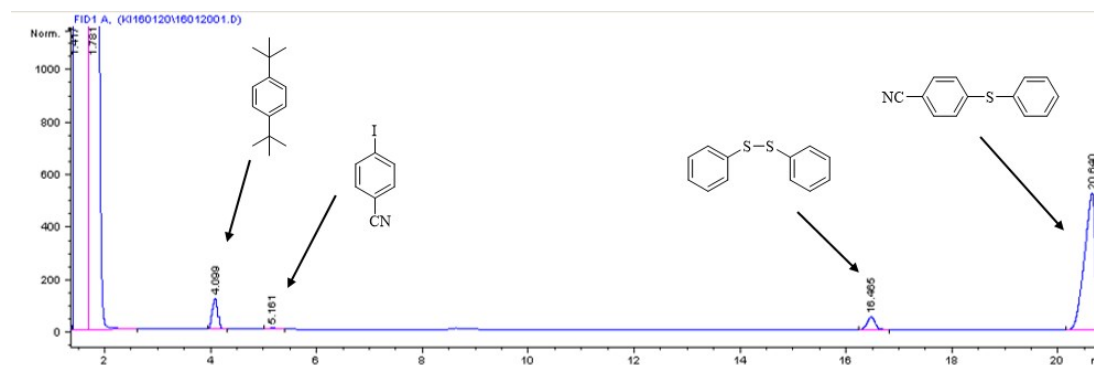

| # | Time   | Area      | Height   | Width  | Area%  | Symmetry |
|---|--------|-----------|----------|--------|--------|----------|
| 1 | 1.417  | 2446139.7 | 400769.1 | 0.0792 | 95.810 | 6.8E-2   |
| 2 | 1.781  | 98500.6   | 10207.3  | 0.1608 | 3.858  | 0.846    |
| 3 | 4.099  | 774.3     | 116.8    | 0.0994 | 0.030  | 1.309    |
| 4 | 5.161  | 39.3      | 7        | 0.085  | 0.002  | 0.797    |
| 5 | 16.465 | 480.9     | 47.8     | 0.1564 | 0.019  | 0.956    |
| 6 | 20.64  | 7169.2    | 520.2    | 0.1948 | 0.281  | 2.529    |

The yield (99%) of product 4-cyanophenyl phenyl sulfide was calculated with the internal standard 1,4-di-*tert*-butylbenzene (4-iodobenzonitrile/internal standard = 10 and product response factor = 1.09).

Table 2, entry 7; HP-1 capillary column was used

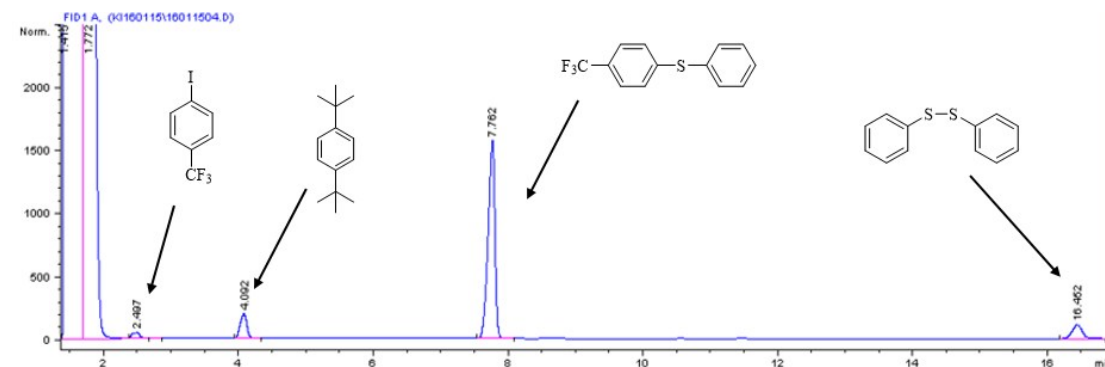

| # | Time   | Area      | Height   | Width  | Area%  | Symmetry |
|---|--------|-----------|----------|--------|--------|----------|
| 1 | 1.415  | 2407560.8 | 394477.3 | 0.0762 | 92.910 | 8.25E-2  |
| 2 | 1.772  | 170082.3  | 18546.6  | 0.1528 | 6.564  | 0.758    |
| 3 | 2.497  | 299.2     | 42.3     | 0.1026 | 0.012  | 1.342    |
| 4 | 4.092  | 1279.2    | 191.2    | 0.1021 | 0.049  | 1.271    |
| 5 | 7.762  | 10980.1   | 1566.8   | 0.0988 | 0.424  | 1.608    |
| 6 | 16.452 | 1069      | 106.1    | 0.1455 | 0.041  | 1.005    |

The yield (99%) of product 4-trifluoromethylphenyl phenyl sulfide was calculated with the internal standard 1,4-di-*tert*-butylbenzene (4-iodobenzotrifluoride/internal standard = 10 and product response factor = 1.18).

Table 2, entry 8; HP-1 capillary column was used

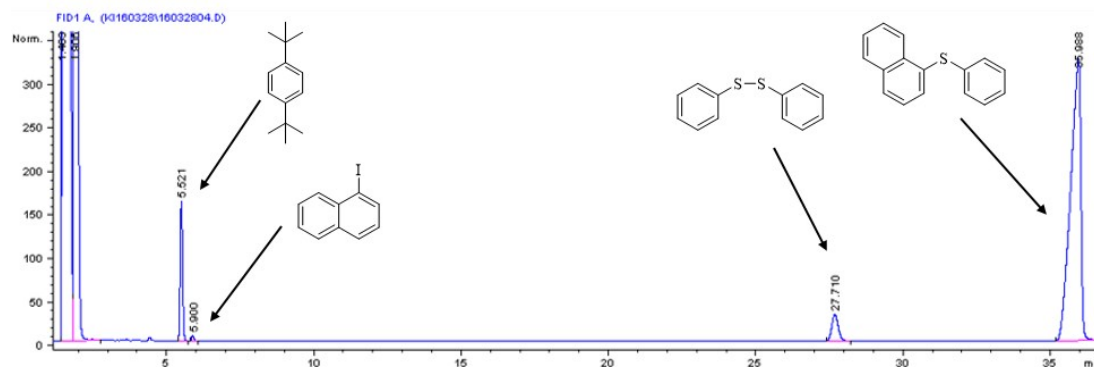

| # | Time   | Area      | Height   | Width  | Area%  | Symmetry |
|---|--------|-----------|----------|--------|--------|----------|
| 1 | 1.463  | 1545133.1 | 273512.9 | 0.0689 | 95.679 | 8.85E-2  |
| 2 | 1.906  | 60552.1   | 10043.4  | 0.0973 | 3.750  | 0.655    |
| 3 | 5.521  | 875.6     | 160.1    | 0.0888 | 0.054  | 0.956    |
| 4 | 5.9    | 30.2      | 5.7      | 0.0821 | 0.002  | 0.932    |
| 5 | 27.71  | 464.2     | 30.7     | 0.2302 | 0.029  | 0.862    |
| 6 | 35.988 | 7856.3    | 324.4    | 0.3276 | 0.486  | 3.211    |

The yield (91%) of product 1-naphthylphenyl sulfide was calculated with the internal standard 1,4-di-*tert*-butylbenzene (1-iodonaphthalene/internal standard = 5 and product response factor = 0.505).

## The Basis Set Effect on Molecular Geometry

### Basis set effect for Cu atom:

The selected bond distances of experimental and computational results were listed in Table S3.

All bond distances obtained by SDD basis set for Cu were more close to experimental results, so that the basis set SDD was used for Cu atom in all calculations.

**Table S3.** The geometric parameters of experimental and computational results.

| DFT method<br>Basis set for Cu<br>Basis set for others |            | B3LYP                  |                 |                  |
|--------------------------------------------------------|------------|------------------------|-----------------|------------------|
|                                                        |            | LanL2DZ(f)<br>6-31G(d) | SDD<br>6-31G(d) | SDD<br>6-31+G(d) |
|                                                        | Exp.       |                        |                 |                  |
| IMes-Cu-Cl <sup>a</sup>                                |            |                        |                 |                  |
| C-Cu                                                   | 1.897 (7)  | 1.922                  | 1.892           | 1.890            |
| Cu-Cl                                                  | 2.095 (2)  | 2.151                  | 2.126           | 2.126            |
| C-Cu-Cl                                                | 180.0 (2)  | 180.00                 | 180.00          | 180.00           |
| IMes-Cu-SPh <sup>b</sup>                               |            |                        |                 |                  |
| Cu-C                                                   | 1.807 (6)  | 1.940                  | 1.909           | 1.909            |
| Cu-S                                                   | 2.047 (2)  | 2.201                  | 2.170           | 2.170            |
| C-Cu-S                                                 | 174.06 (8) | 177.46                 | 177.66          | 174.77           |
| IPr-Cu-SPh <sup>b</sup>                                |            |                        |                 |                  |
| Cu-C                                                   | 1.895 (1)  | 1.939                  | 1.909           | 1.908            |
| Cu-S                                                   | 2.139 (1)  | 2.199                  | 2.170           | 2.170            |
| C-Cu-S                                                 | 178.3 (1)  | 177.35                 | 176.72          | 174.73           |

<sup>a</sup> X-ray data obtained from *Dalton Trans.*, **2010**, 39, 4489.

<sup>b</sup> X-ray data obtained from *Inorg. Chem.*, **2007**, 46, 2365.

### Basis set effect for S atoms:

Based on the large size and high electronegativity of S atom, the smallest basis set for S is 6-31+G(d). However, regardless of 6-31+G(d) or 6-311+G(d,p) for S, the Cu-S bond distance of computational data is longer than that of experimental one. Maybe B3LYP is not good enough to reproduce the experimental Cu-S distances. Based on the basis set balance and computational cost, 6-31+G(d) is selected for main group atoms (H, C N, O, S, Cl, Li and Na) to perform structure optimization.

**Table S4.** Experimental and computational results of Cu-S distances.

| Symmetry                                         |                                              | B3LYP              |                    |                    |
|--------------------------------------------------|----------------------------------------------|--------------------|--------------------|--------------------|
|                                                  |                                              | C2v                | C2v                | C2v                |
| Basis Set                                        |                                              | BS1                | BS2                | BS3                |
| Basis set for Cu                                 |                                              | SDD                | SDD                | SDD                |
| Basis set for S                                  |                                              | 6-31+G(d)          | 6-311+G(d,p)       | 6-311+G(d,p)       |
| Basis set for others                             |                                              | 6-31+G(d)          | 6-31G(d)           | 6-311G(d,p)        |
|                                                  | Exp.                                         |                    |                    |                    |
| Cu-SPh                                           | -                                            | 2.135              | 2.139              | 2.140              |
| Cu(SPh) <sub>2</sub> <sup>-</sup>                | -                                            | 2.196              | 2.199              | 2.200              |
| IMes-Cu-SPh                                      | 2.047 (2)                                    | 2.170              | 2.174              | 2.174              |
| IPr-Cu-SPh                                       | 2.139 (1)                                    | 2.170              | 2.174              | 2.174              |
| Phen-Cu-SPh <sup>a</sup>                         | -                                            | 2.166              | 2.171              | 2.171              |
| Cu <sub>4</sub> (SPh) <sub>6</sub> <sup>2-</sup> | 2.290 <sup>b,c</sup><br>2.281 <sup>b,d</sup> | 2.346 <sup>b</sup> | 2.349 <sup>b</sup> | 2.353 <sup>b</sup> |

<sup>a</sup> The calculated Cu-S distance 2.21 Å was reported in *Organometallics*, **2013**, 32, 4944. The basis set of LANL2DZ for Cu, 6-311+G(d) for S, 6-31(d) for others was used. The DFT method is also B3LYP.

<sup>b</sup> Average Cu-S distance.

<sup>c</sup> *Inorg. Chim. Acta*, **1976**, 19, L41.

<sup>d</sup> *Inorg. Chim. Acta*, **1987**, 136,139.

# The Equilibria of Copper Species in Toluene or in DMF

## a) in toluene

M = Li, Na  
L = IMes, IPr

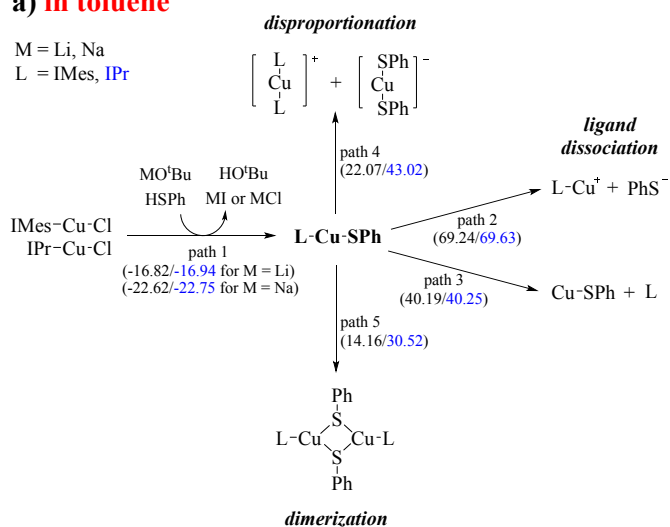

## b) in DMF

M = Li, Na  
L = IMes, IPr

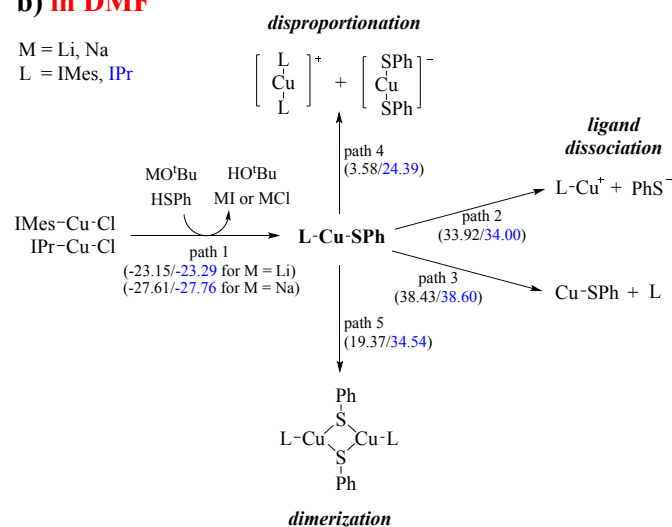

**Fig. S1.** The possible copper species in toluene solvent. The  $\Delta G$  values (kcal/mol; black for L = IMes and blue for L = IPr) are shown in parentheses. (a) in toluene, (b) in DMF.

Even if in DMF, the disproportionation with positive  $\Delta G_{\text{path4}}$  values (3.58 kcal/mol for L = IMes and 24.39 kcal/mol for L = IPr) is also unfavorable to form  $Cu(SPh)_2^-$  and  $L_2-Cu^+$  species. This result is different from the result reported by Organometallics, 2013, 32, 4944 (1,10-phenanthroline is used as ligand). The stronger binding capacity and higher steric hindrance of carbene ligands are main reasons to prevent disproportionation.



## The Results Obtained by B3LYP/BS-1

Based on the former discussions, the geometry optimization and free energy correction (at 298.15 K and 1 atm) was calculated by basis sets of SDD for heavy atoms (Cu and I) and 6-31+G(d) for main group atoms (H, C, N, O, S, Cl, Li and Na). This basis set is noted as BS-1. Single-point solvent effect (toluene solvent,  $\epsilon = 2.37$ ; DMF,  $\epsilon = 37.22$ ) was calculated by self-consistent reaction field with CPCM solvation model, and these calculations were carried out on the optimized gas-phase geometries. Using smaller basis set also can produce consistent results.

Using smaller basis set also can produce consistent results, especially on activation energy results. Based on the sense of computational chemistry, we prefer to obtain  $\Delta G$  by using larger basis set. However, these two basis sets provide the consistent results and no effect on the conclusions.

### The equilibriums of copper species in toluene or in DMF:

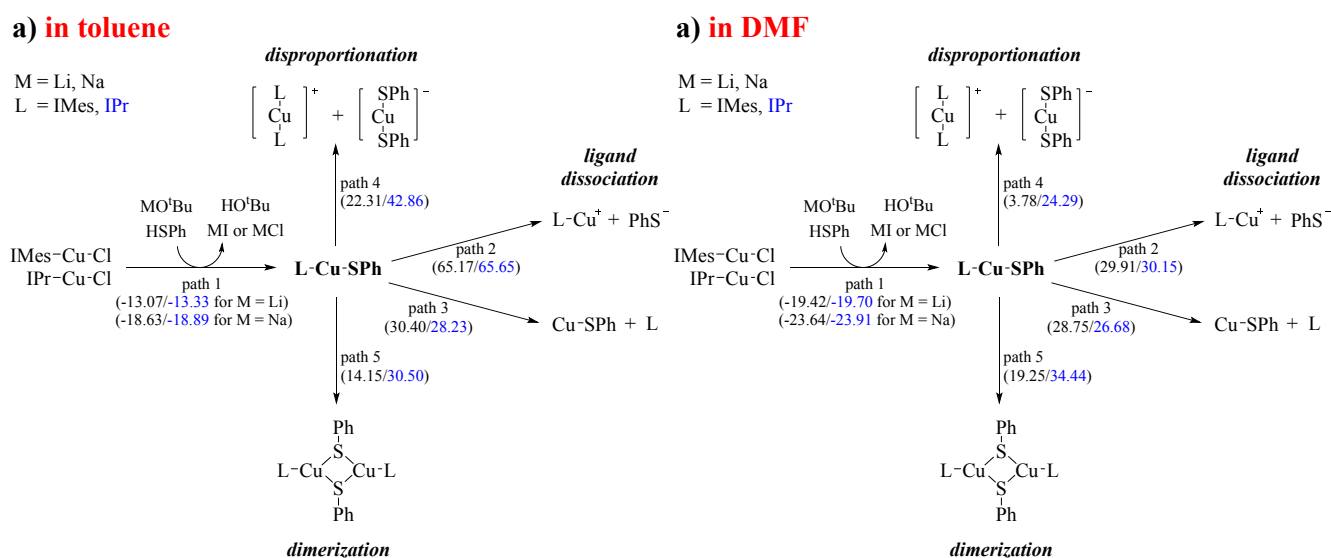

**Fig. S4.** The possible copper species in toluene solvent. The  $\Delta G$  values (kcal/mol; black for L = IMes and blue for L = IPr) are shown in parentheses. (a) in toluene, (b) in DMF.



Oxidative addition/reductive elimination vs.  $\sigma$ -bond metathesis in toluene:

**In Toluene**

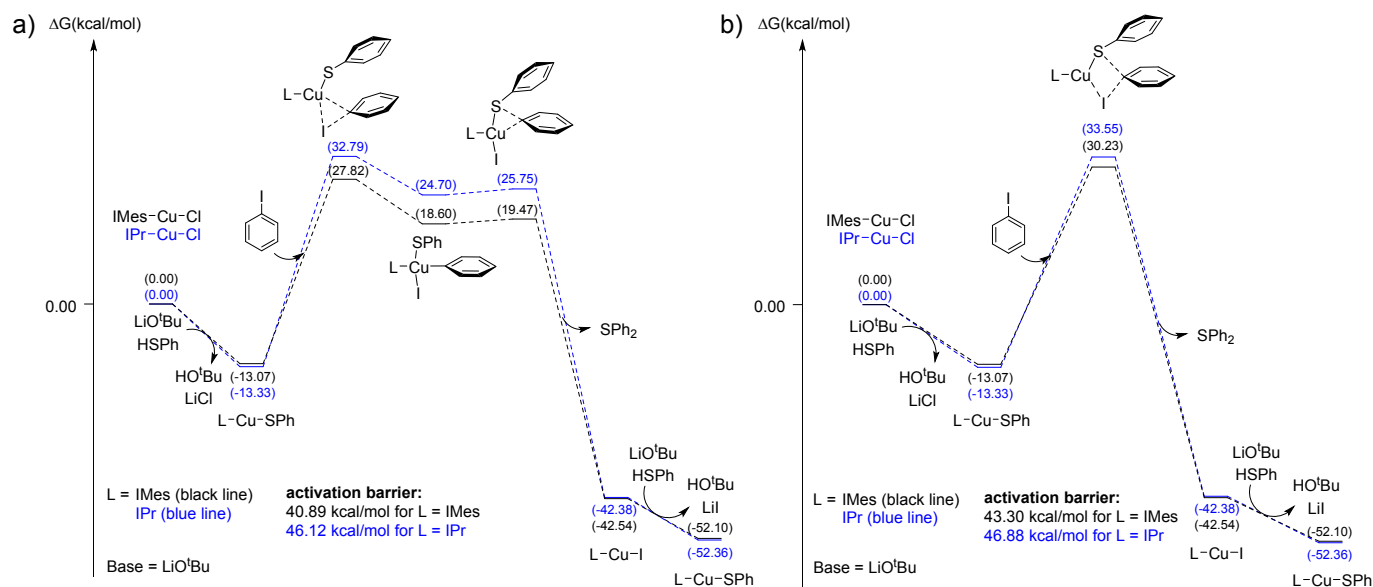

**Fig. S5.** Free energy profile (kcal/mol) for (a) oxidative addition/ reductive elimination paths and (b)  $\sigma$ -bond metathesis paths in toluene. The used base is LiOtBu.

**In Toluene**

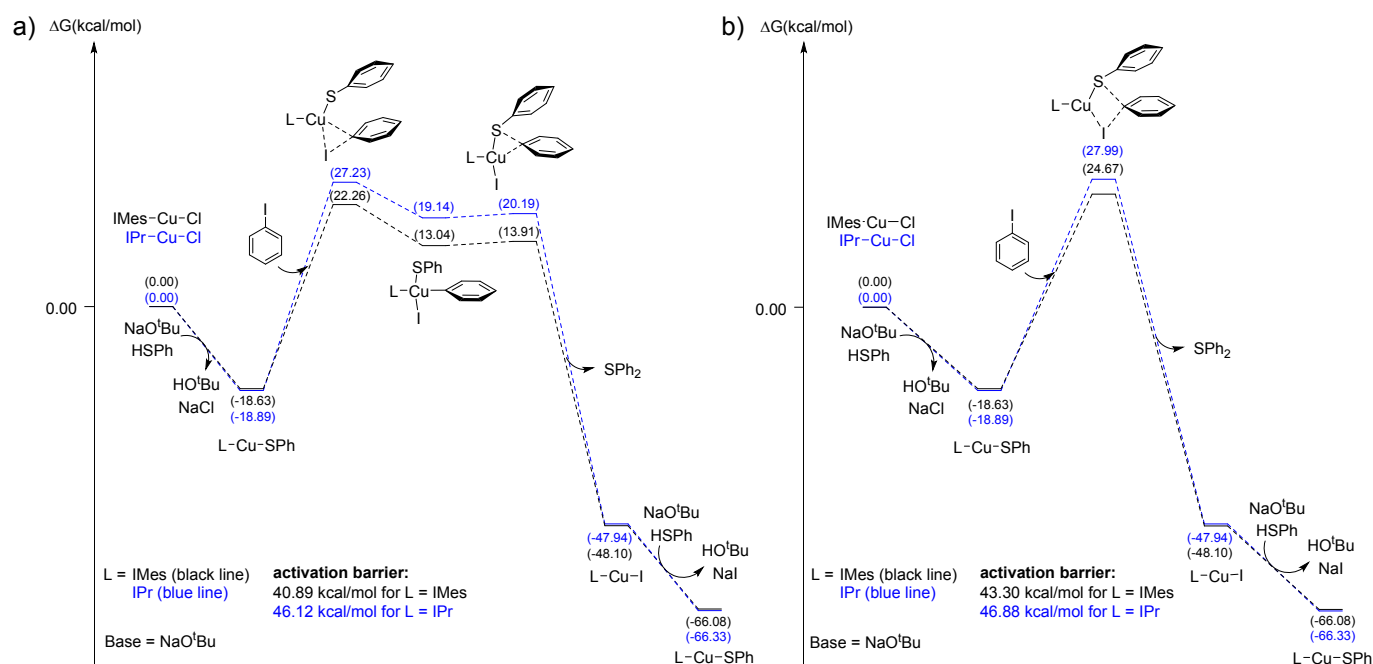

**Fig. S6.** Free energy profile (kcal/mol) for (a) oxidative addition/ reductive elimination paths and (b)  $\sigma$ -bond metathesis paths in toluene. The used base is NaOtBu.

Oxidative addition/reductive elimination vs.  $\sigma$ -bond metathesis in DMF:

In DMF

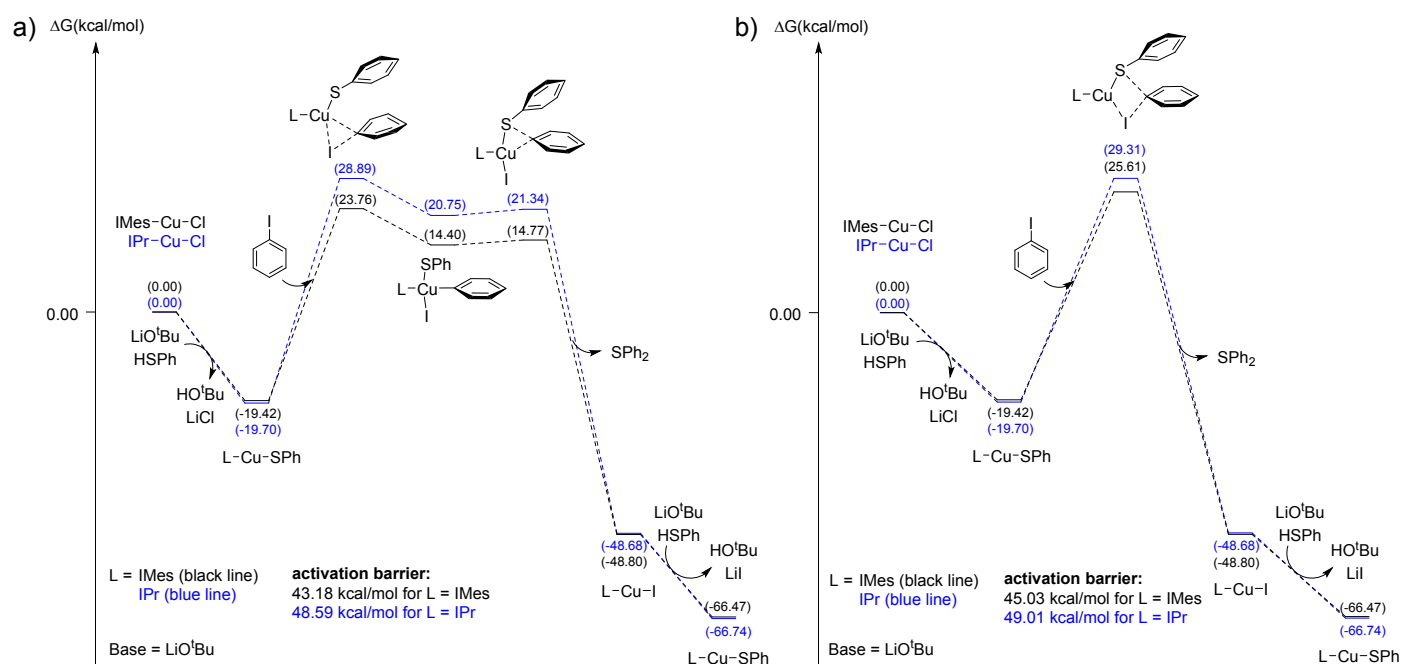

Fig. S7. Free energy profile (kcal/mol) for (a) oxidative addition/ reductive elimination paths and (b)  $\sigma$ -bond metathesis paths in DMF. The used base is  $\text{LiOtBu}$ .

In DMF

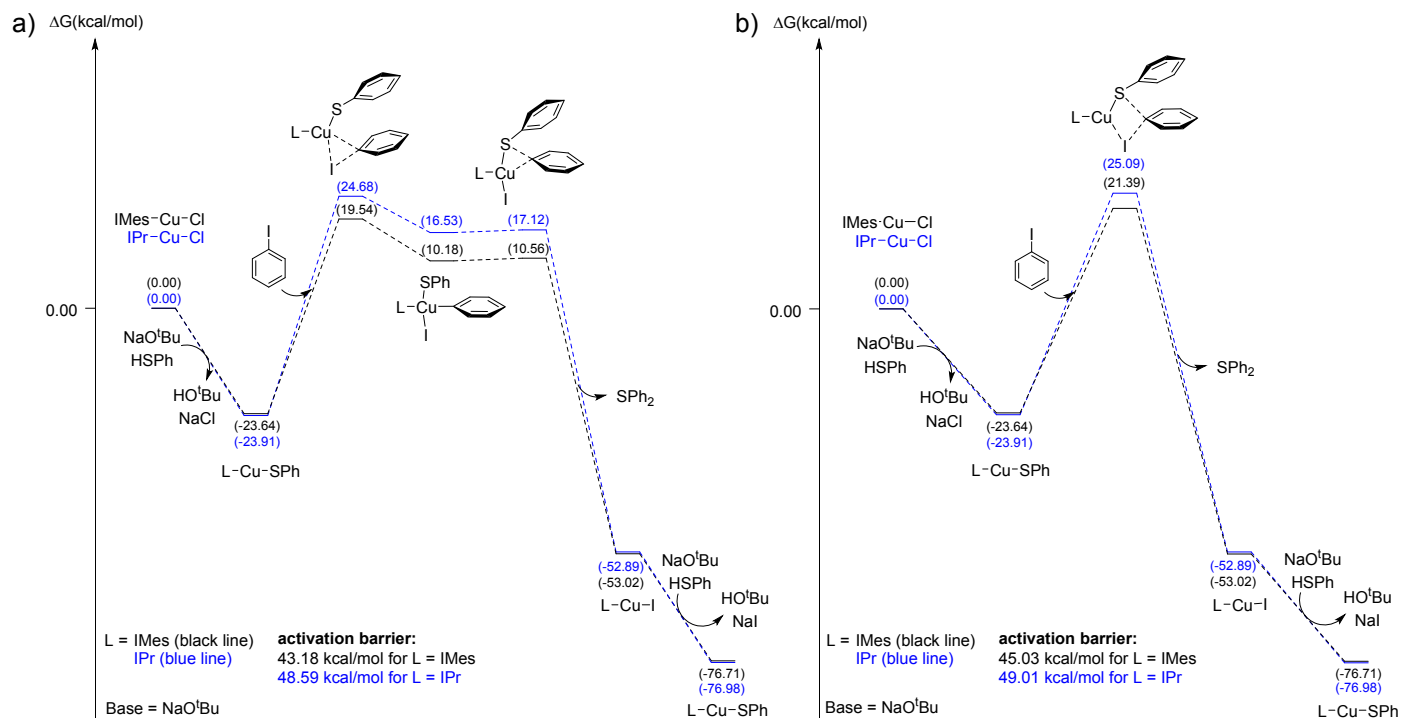

Fig. S8. Free energy profile (kcal/mol) for (a) oxidative addition/ reductive elimination paths and (b)  $\sigma$ -bond metathesis paths in DMF. The used base is  $\text{NaOtBu}$ .

# Molecular Geometry, Free Energy Correction and PCM Energy

## LiO<sup>t</sup>Bu

|    |            |            |            |
|----|------------|------------|------------|
| O  | 0.0000000  | 0.0000000  | 1.2767190  |
| C  | 0.0000000  | 0.0000000  | -0.1130240 |
| C  | 0.0000000  | 1.4554440  | -0.6333900 |
| C  | 1.2604520  | -0.7277220 | -0.6333900 |
| C  | -1.2604520 | -0.7277220 | -0.6333900 |
| H  | 0.0000000  | 1.5048510  | -1.7308880 |
| H  | 0.8877440  | 1.9843000  | -0.2642270 |
| H  | -0.8877440 | 1.9843000  | -0.2642270 |
| H  | 1.3032390  | -0.7524250 | -1.7308880 |
| H  | 1.2745820  | -1.7609590 | -0.2642270 |
| H  | 2.1623260  | -0.2233410 | -0.2642270 |
| H  | -1.3032390 | -0.7524250 | -1.7308880 |
| H  | -2.1623260 | -0.2233410 | -0.2642270 |
| H  | -1.2745820 | -1.7609590 | -0.2642270 |
| Li | 0.0000000  | 0.0000000  | 2.8811470  |

Thermal correction to Gibbs Free Energy= 0.095932  
 PCM energy (toluene) = -240.735427260  
 PCM energy (DMF) = -240.753442092

## NaO<sup>t</sup>Bu

|    |            |            |            |
|----|------------|------------|------------|
| O  | 0.0000100  | 0.0000330  | -0.7590170 |
| C  | 0.0000000  | 0.0000140  | 0.6250530  |
| C  | -1.2599620 | 0.7274360  | 1.1567770  |
| C  | 0.0000000  | -1.4548530 | 1.1568020  |
| C  | 1.2599620  | 0.7274360  | 1.1567780  |
| H  | -1.3035820 | 0.7523800  | 2.2552580  |
| H  | -2.1623560 | 0.2234040  | 0.7869640  |
| H  | -1.2744880 | 1.7610720  | 0.7873030  |
| H  | -0.0000100 | -1.5050090 | 2.2552820  |
| H  | 0.8878080  | -1.9842990 | 0.7872030  |
| H  | -0.8878080 | -1.9842980 | 0.7872030  |
| H  | 1.3035810  | 0.7523800  | 2.2552590  |
| H  | 1.2744890  | 1.7610720  | 0.7873040  |
| H  | 2.1623560  | 0.2234040  | 0.7869660  |
| Na | -0.0000100 | -0.0001700 | -2.7228860 |

Thermal correction to Gibbs Free Energy= 0.091091  
 PCM energy (toluene) = -395.490623789  
 PCM energy (DMF) = -395.510419091

## HO<sup>t</sup>Bu

|   |            |            |            |
|---|------------|------------|------------|
| O | -0.4871700 | 1.3723020  | 0.0000000  |
| C | 0.0013130  | 0.0126030  | 0.0000000  |
| C | 1.5258810  | 0.1468840  | 0.0000000  |
| C | -0.4871700 | -0.7082980 | 1.2655900  |
| C | -0.4871700 | -0.7082980 | -1.2655900 |
| H | 2.0027530  | -0.8398320 | 0.0000000  |
| H | 1.8596520  | 0.6959260  | 0.8871930  |
| H | 1.8596520  | 0.6959260  | -0.8871930 |
| H | -0.0947490 | -1.7312960 | 1.3165070  |
| H | -1.5837020 | -0.7724650 | 1.2817640  |
| H | -0.1634660 | -0.1667120 | 2.1611340  |
| H | -0.0947490 | -1.7312960 | -1.3165070 |
| H | -0.1634660 | -0.1667120 | -2.1611340 |
| H | -1.5837020 | -0.7724650 | -1.2817640 |
| H | -1.4579830 | 1.3531570  | 0.0000000  |

Thermal correction to Gibbs Free Energy= 0.106761  
 PCM energy (toluene) = -233.755357364  
 PCM energy (DMF) = -233.757758660

## LiCl

|    |           |           |            |
|----|-----------|-----------|------------|
| Li | 0.0000000 | 0.0000000 | -1.7464430 |
| Cl | 0.0000000 | 0.0000000 | 0.3081960  |

Thermal correction to Gibbs Free Energy= -0.019319  
 PCM energy (toluene) = -467.870003679  
 PCM energy (DMF) = -467.898475865

## LiI

|    |           |           |            |
|----|-----------|-----------|------------|
| Li | 0.0000000 | 0.0000000 | -2.3063910 |
| I  | 0.0000000 | 0.0000000 | 0.1305500  |

Thermal correction to Gibbs Free Energy= -0.021763  
 PCM energy (toluene) = -19.0589803868  
 PCM energy (DMF) = -19.0889807628

## NaCl

|    |           |           |            |
|----|-----------|-----------|------------|
| Na | 0.0000000 | 0.0000000 | -1.4512250 |
| Cl | 0.0000000 | 0.0000000 | 0.9390280  |

Thermal correction to Gibbs Free Energy= -0.021635  
 PCM energy (toluene) = -622.636973294  
 PCM energy (DMF) = -622.665093915

## NaI

|    |           |           |            |
|----|-----------|-----------|------------|
| Na | 0.0000000 | 0.0000000 | -2.2725840 |
| I  | 0.0000000 | 0.0000000 | 0.4716680  |

Thermal correction to Gibbs Free Energy= -0.023921  
 PCM energy (toluene) = -173.831126285  
 PCM energy (DMF) = -173.858996453

## CuSPh

|    |            |            |            |
|----|------------|------------|------------|
| Cu | 1.3128100  | -1.9461260 | 0.0000000  |
| S  | -0.7396400 | -1.3598590 | 0.0000000  |
| C  | -0.6354740 | 0.4362310  | 0.0000000  |
| C  | -0.6404570 | 1.1495720  | 1.2107470  |
| C  | -0.6404570 | 2.5468270  | 1.2085740  |
| C  | -0.6382980 | 3.2510400  | 0.0000000  |
| C  | -0.6404570 | 2.5468270  | -1.2085740 |
| C  | -0.6404570 | 1.1495720  | -1.2107470 |
| H  | -0.6474680 | 0.6032110  | 2.1495470  |
| H  | -0.6448170 | 3.0852800  | 2.1533370  |
| H  | -0.6390820 | 4.3380220  | 0.0000000  |
| H  | -0.6448170 | 3.0852800  | -2.1533370 |
| H  | -0.6474680 | 0.6032110  | -2.1495470 |

Thermal correction to Gibbs Free Energy= 0.057192  
 PCM energy (toluene) = -827.301515038  
 PCM energy (DMF) = -827.308847576

## Cu(SPh)<sub>2</sub><sup>-</sup>

|    |            |            |            |
|----|------------|------------|------------|
| Cu | 0.0000000  | 0.0000000  | -1.1538330 |
| S  | -1.0614320 | 1.9208120  | -1.2261230 |
| C  | -0.3104660 | 3.0401420  | -0.0709580 |
| C  | -0.8483290 | 4.3404610  | 0.0621130  |
| C  | -0.3020620 | 5.2669940  | 0.9517200  |
| C  | 0.8032240  | 4.9313490  | 1.7437000  |
| C  | 1.3477910  | 3.6470260  | 1.6236050  |
| C  | 0.8038310  | 2.7177950  | 0.7341880  |
| H  | -1.7069990 | 4.6149930  | -0.5462430 |
| H  | -0.7443650 | 6.2596960  | 1.0265780  |
| H  | 1.2292840  | 5.6528750  | 2.4376090  |
| H  | 2.2070180  | 3.3613010  | 2.2286130  |
| H  | 1.2406140  | 1.7257340  | 0.6548220  |
| S  | 1.0614320  | -1.9208120 | -1.2261230 |
| C  | 0.3104660  | -3.0401420 | -0.0709580 |
| C  | 0.8483290  | -4.3404600 | 0.0621130  |
| C  | 0.3020620  | -5.2669940 | 0.9517200  |
| C  | -0.8032240 | -4.9313490 | 1.7437000  |
| C  | -1.3477910 | -3.6470260 | 1.6236040  |
| C  | -0.8038310 | -2.7177950 | 0.7341880  |
| H  | 1.7069990  | -4.6149930 | -0.5462430 |
| H  | 0.7443650  | -6.2596950 | 1.0265780  |
| H  | -1.2292840 | -5.6528750 | 2.4376090  |
| H  | -2.2070180 | -3.3613010 | 2.2286130  |
| H  | -1.2406150 | -1.7257340 | 0.6548220  |

Thermal correction to Gibbs Free Energy= 0.135047  
 PCM energy (toluene) = -1457.41472830  
 PCM energy (DMF) = -1457.44456656

## HSPH

|   |            |            |           |
|---|------------|------------|-----------|
| S | -0.0837040 | 2.2949080  | 0.0000000 |
| C | 0.0000000  | 0.5091210  | 0.0000000 |
| C | 1.2120510  | -0.1956880 | 0.0000000 |
| C | 1.2090920  | -1.5926750 | 0.0000000 |
| C | 0.0046580  | -2.3008160 | 0.0000000 |
| C | -1.2030480 | -1.5966310 | 0.0000000 |
| C | -1.2102300 | -0.2008230 | 0.0000000 |
| H | 2.1583440  | 0.3395200  | 0.0000000 |
| H | 2.1564480  | -2.1261070 | 0.0000000 |
| H | 0.0068070  | -3.3872760 | 0.0000000 |

|   |             |             |            |
|---|-------------|-------------|------------|
| H | -2.14811600 | -2.13389200 | 0.00000000 |
| H | -2.15569700 | 0.33589400  | 0.00000000 |
| H | 1.24634000  | 2.51839500  | 0.00000000 |

Thermal correction to Gibbs Free Energy= 0.068298  
 PCM energy (toluene) = -630.528019251  
 PCM energy (DMF) = -630.530213567

### SPh

|   |            |             |             |
|---|------------|-------------|-------------|
| S | 0.00000000 | 0.00000000  | 2.34805700  |
| C | 0.00000000 | 0.00000000  | 0.59786900  |
| C | 0.00000000 | 1.20327700  | -0.16366400 |
| C | 0.00000000 | 1.20243500  | -1.55854300 |
| C | 0.00000000 | 0.00000000  | -2.28188400 |
| C | 0.00000000 | -1.20243500 | -1.55854300 |
| C | 0.00000000 | -1.20327700 | -0.16366400 |
| H | 0.00000000 | 2.14682600  | 0.37775100  |
| H | 0.00000000 | 2.15448400  | -2.09160600 |
| H | 0.00000000 | 0.00000000  | -3.37062500 |
| H | 0.00000000 | -2.15448400 | -2.09160600 |
| H | 0.00000000 | -2.14682600 | 0.37775100  |

Thermal correction to Gibbs Free Energy= 0.060345  
 PCM energy (toluene) = -630.030325629  
 PCM energy (DMF) = -630.067809142

### IMes

|   |             |             |             |
|---|-------------|-------------|-------------|
| N | 0.00000000  | 1.06605400  | -0.58248500 |
| C | 0.00000000  | 0.00000000  | 0.28288100  |
| N | 0.00000000  | -1.06605400 | -0.58248500 |
| C | 0.00000000  | -0.67828300 | -1.92531200 |
| C | 0.00000000  | 0.67828300  | -1.92531200 |
| H | 0.00000000  | -1.39027400 | -2.73770800 |
| H | 0.00000000  | 1.39027400  | -2.73770800 |
| C | 0.00000000  | 2.44022800  | -0.15367400 |
| C | -1.22666700 | 3.09495700  | 0.04580700  |
| C | -1.20100400 | 4.43763000  | 0.44204200  |
| C | 0.00000000  | 5.12637100  | 0.64651300  |
| C | 1.20100400  | 4.43763000  | 0.44204200  |
| C | 1.22666700  | 3.09495700  | 0.04580700  |
| C | -2.53953000 | 2.37204900  | -0.14229400 |
| H | -2.61912800 | 1.52174500  | 0.54496500  |
| H | -2.64394900 | 1.97181000  | -1.15797100 |
| H | -3.38219200 | 3.04534100  | 0.04429000  |
| H | -2.14576700 | 4.95567000  | 0.59765600  |
| C | 0.00000000  | 6.56636500  | 1.10819500  |
| H | -0.88660000 | 7.10223500  | 0.75129900  |
| H | 0.88660000  | 7.10223500  | 0.75129900  |
| H | 0.00000000  | 6.62918100  | 2.20499700  |
| H | 2.14576700  | 4.95567000  | 0.59765600  |
| C | 2.53953000  | 2.37204900  | -0.14229400 |
| C | 2.61912800  | 1.52174500  | 0.54496500  |
| H | 3.38219200  | 3.04534100  | 0.04429000  |
| C | 2.64394900  | 1.97181000  | -1.15797100 |
| H | 0.00000000  | -2.44022800 | -0.15367400 |
| C | 1.22666700  | -3.09495700 | 0.04580700  |
| C | 1.20100400  | -4.43763000 | 0.44204200  |
| C | 0.00000000  | -5.12637100 | 0.64651300  |
| C | -1.20100400 | -4.43763000 | 0.44204200  |
| C | -1.22666700 | -3.09495700 | 0.04580700  |
| C | 2.53953000  | -2.37204900 | -0.14229400 |
| H | 2.61912800  | -1.52174500 | 0.54496500  |
| H | 2.64394900  | -1.97181000 | -1.15797100 |
| H | 3.38219200  | -3.04534100 | 0.04429000  |
| H | 2.14576700  | -4.95567000 | 0.59765600  |
| C | 0.00000000  | -6.56636500 | 1.10819500  |
| H | -0.88660000 | -7.10223500 | 0.75129900  |
| H | 0.88660000  | -7.10223500 | 0.75129900  |
| H | -2.14576700 | -4.95567000 | 0.59765600  |
| C | -2.53953000 | -2.37204900 | -0.14229400 |
| H | -2.61912800 | -1.52174500 | 0.54496500  |
| H | -3.38219200 | -3.04534100 | 0.04429000  |
| H | -2.64394900 | -1.97181000 | -1.15797100 |

Thermal correction to Gibbs Free Energy= 0.339465  
 PCM energy (toluene) = -924.410770459  
 PCM energy (DMF) = -924.416351313

### IPr

|   |            |             |             |
|---|------------|-------------|-------------|
| N | 0.00000000 | 1.06627100  | -0.50918900 |
| C | 0.00000000 | 0.00000000  | 0.35825500  |
| N | 0.00000000 | -1.06627100 | -0.50918900 |
| C | 0.00000000 | -0.67857000 | -1.85044900 |
| C | 0.00000000 | 0.67857000  | -1.85044900 |
| H | 0.00000000 | -1.39052500 | -2.66261700 |
| H | 0.00000000 | 1.39052500  | -2.66261700 |

|   |             |             |             |
|---|-------------|-------------|-------------|
| C | 0.00000000  | 2.44450100  | -0.08550200 |
| C | -1.23472700 | 3.09658500  | 0.11167900  |
| C | -1.20650600 | 4.43818200  | 0.51625800  |
| C | 0.00000000  | 5.10573100  | 0.71632200  |
| C | 1.20650600  | 4.43818200  | 0.51625800  |
| C | 1.23472700  | 3.09658500  | 0.11167900  |
| H | -2.57250100 | 2.38583300  | -0.06905100 |
| H | -2.37165500 | 1.38914200  | -0.47213700 |
| C | -3.28096000 | 2.19221700  | 1.28714600  |
| H | -2.64737600 | 1.63069300  | 1.98167600  |
| H | -4.21858700 | 1.63827300  | 1.15256300  |
| H | -3.52474000 | 3.15619400  | 1.75102600  |
| C | -3.48716700 | 3.11111700  | -1.07559700 |
| H | -2.99347900 | 3.23771900  | -2.04638300 |
| H | -3.78039100 | 4.10553300  | -0.71781600 |
| H | -4.40648900 | 2.53403700  | -1.23474400 |
| H | -2.14173500 | 4.96639700  | 0.68220000  |
| H | 0.00000000  | 6.14629700  | 1.03196200  |
| C | 2.14173500  | 4.96639700  | 0.68220000  |
| H | 2.57250100  | 2.38583300  | -0.06905100 |
| H | 2.37165500  | 1.38914200  | -0.47213700 |
| C | 3.28096000  | 2.19221700  | 1.28714600  |
| C | 2.64737600  | 1.63069300  | 1.98167600  |
| H | 3.52474000  | 3.15619400  | 1.75102600  |
| C | 4.21858700  | 1.63827300  | 1.15256300  |
| H | 3.48716700  | 3.11111700  | -1.07559700 |
| H | 2.99347900  | 3.23771900  | -2.04638300 |
| H | 4.40648900  | 2.53403700  | -1.23474400 |
| H | 3.78039100  | 4.10553300  | -0.71781600 |
| C | 0.00000000  | -2.44450100 | -0.08550200 |
| C | 1.23472700  | -3.09658500 | 0.11167900  |
| C | 1.20650600  | -4.43818200 | 0.51625800  |
| C | 0.00000000  | -5.10573100 | 0.71632200  |
| C | -1.20650600 | -4.43818200 | 0.51625800  |
| C | -1.23472700 | -3.09658500 | 0.11167900  |
| C | 2.57250100  | -2.38583300 | -0.06905100 |
| H | 2.37165500  | -1.38914200 | -0.47213700 |
| C | 3.28096000  | -2.19221700 | 1.28714600  |
| H | 2.64737600  | -1.63069300 | 1.98167600  |
| H | 4.21858700  | -1.63827300 | 1.15256300  |
| H | 3.52474000  | -3.15619400 | 1.75102600  |
| C | 3.48716700  | -3.11111700 | -1.07559700 |
| H | 2.99347900  | -3.23771900 | -2.04638300 |
| H | 4.40648900  | -2.53403700 | -1.23474400 |
| H | 3.78039100  | -4.10553300 | -0.71781600 |

Thermal correction to Gibbs Free Energy= 0.505897  
 PCM energy (toluene) = -1160.33831538  
 PCM energy (DMF) = -1160.34376366

### IMes-Cu<sup>+</sup>

|   |             |             |             |
|---|-------------|-------------|-------------|
| N | 0.79004400  | 0.74320000  | -0.91207000 |
| C | 0.00000000  | 0.00000000  | -0.09699600 |
| N | -0.79004400 | -0.74320000 | -0.91207000 |
| C | -0.49576400 | -0.46640700 | -2.24031700 |
| C | 0.49576400  | 0.46640700  | -2.24031700 |
| H | -1.01499200 | -0.95484900 | -3.05096900 |
| H | 1.01499200  | 0.95484900  | -3.05096900 |
| C | 1.79329100  | 1.68694100  | -0.46032700 |
| C | 1.41643300  | 3.02663800  | -0.25727000 |
| C | 2.40652400  | 3.91556400  | 0.17706300  |
| C | 3.72911800  | 3.50799500  | 0.39568500  |
| C | 4.05609700  | 2.16364800  | 0.17332700  |
| C | 3.10849000  | 1.22979600  | -0.26101900 |
| H | 0.00483100  | 3.50864400  | -0.50458400 |
| H | -0.72901100 | 2.96367700  | 0.10154100  |
| H | -0.28999600 | 3.38341000  | -1.55369700 |
| H | -0.08632100 | 4.57056700  | -0.26126000 |
| H | 2.13657100  | 4.95589500  | 0.34331200  |
| C | 4.78305200  | 4.49884500  | 0.82965100  |
| H | 4.34895600  | 5.31903400  | 1.41035800  |
| H | 5.27993900  | 4.94274000  | -0.04312300 |
| H | 5.55791800  | 4.02089800  | 1.43772600  |
| H | 5.07870900  | 1.83133700  | 0.33671700  |
| C | 3.50416300  | -0.20769200 | -0.51238400 |
| H | 2.91556000  | -0.90895800 | 0.09147100  |
| H | 4.55855600  | -0.36372100 | -0.26925100 |

|    |             |             |             |
|----|-------------|-------------|-------------|
| H  | 3.36162500  | -0.49134000 | -1.56238000 |
| C  | -1.79329100 | -1.68694100 | -0.46032700 |
| C  | -1.41643300 | -3.02663800 | -0.25727000 |
| C  | -2.40652400 | -3.91556400 | 0.17706300  |
| C  | -3.72911800 | -3.50799500 | 0.39568500  |
| C  | -4.05609700 | -2.16364800 | 0.17332700  |
| C  | -3.10849000 | -1.22979600 | -0.26101900 |
| C  | -0.00483100 | -3.50864400 | -0.50458400 |
| H  | 0.72901100  | -2.96367700 | 0.10154100  |
| H  | 0.28999600  | -3.38341000 | -1.55369700 |
| H  | 0.08632100  | -4.57056700 | -0.26126000 |
| H  | -2.13657100 | -4.95589500 | 0.34331200  |
| C  | -4.78305200 | -4.49884500 | 0.82965100  |
| C  | -5.27993900 | -4.94274000 | -0.04312300 |
| H  | -5.55791800 | -4.02089800 | 1.43772600  |
| H  | -4.34895600 | -5.31903400 | 1.41035800  |
| H  | -5.07870900 | -1.83133700 | 0.33671700  |
| C  | -3.50416300 | 0.20769200  | -0.51238400 |
| H  | -2.91556000 | 0.90895800  | 0.09147100  |
| H  | -4.55855600 | 0.36372100  | -0.26925100 |
| H  | -3.36162500 | 0.49134000  | -1.56238100 |
| Cu | 0.00000000  | 0.00000000  | 1.78348200  |

Thermal correction to Gibbs Free Energy= 0.338920

PCM energy (toluene) = -1121.63827303

PCM energy (DMF) = -1121.66718489

### IMes-Cu<sup>+</sup>-IMes

|    |             |             |             |
|----|-------------|-------------|-------------|
| N  | 0.00000000  | 1.07761300  | 2.75815400  |
| C  | 0.00000000  | 0.00000000  | 1.92251400  |
| N  | 0.00000000  | -1.07761300 | 2.75815400  |
| C  | 0.00000000  | -0.67921400 | 4.09010300  |
| C  | 0.00000000  | 0.67921400  | 4.09010300  |
| H  | 0.00000000  | -1.39284200 | 4.90002100  |
| H  | 0.00000000  | 1.39284200  | 4.90002100  |
| C  | 0.00000000  | 2.45887500  | 2.32981200  |
| C  | 1.23142500  | 3.11084900  | 2.14429400  |
| C  | 1.20234400  | 4.45474500  | 1.75266100  |
| C  | 0.00000000  | 5.14572200  | 1.55563800  |
| C  | -1.20234400 | 4.45474500  | 1.75266100  |
| C  | -1.23142500 | 3.11084900  | 2.14429400  |
| C  | 2.54804500  | 2.39900900  | 2.35495800  |
| H  | 2.67387300  | 1.56559900  | 1.65329000  |
| H  | 2.63035700  | 1.98319400  | 3.36623900  |
| H  | 3.38474400  | 3.08835500  | 2.20996600  |
| H  | 2.14576000  | 4.97652800  | 1.60625200  |
| C  | 0.00000000  | 6.60871100  | 1.17725800  |
| H  | 0.88696000  | 6.87297800  | 0.59182900  |
| H  | 0.00000000  | 7.24287900  | 2.07374900  |
| H  | -0.88696000 | 6.87297800  | 0.59182900  |
| H  | -2.14576000 | 4.97652800  | 1.60625200  |
| C  | -2.54804500 | 2.39900900  | 2.35495800  |
| H  | -2.67387300 | 1.56559900  | 1.65329000  |
| H  | -3.38474400 | 3.08835500  | 2.20996600  |
| C  | -2.63035700 | 1.98319400  | 3.36623900  |
| C  | 0.00000000  | -2.45887500 | 2.32981200  |
| C  | -1.23142500 | -3.11084900 | 2.14429400  |
| C  | -1.20234400 | -4.45474500 | 1.75266100  |
| C  | 0.00000000  | -5.14572200 | 1.55563800  |
| C  | 1.20234400  | -4.45474500 | 1.75266100  |
| C  | 1.23142500  | -3.11084900 | 2.14429400  |
| C  | -2.54804500 | -2.39900900 | 2.35495800  |
| H  | -2.67387300 | -1.56559900 | 1.65329000  |
| H  | -2.63035700 | -1.98319400 | 3.36623900  |
| H  | -3.38474400 | -3.08835500 | 2.20996600  |
| H  | -2.14576000 | -4.97652800 | 1.60625200  |
| C  | 0.00000000  | -6.60871100 | 1.17725800  |
| H  | 0.88696000  | -6.87297800 | 0.59182900  |
| H  | -0.88696000 | -6.87297800 | 0.59182900  |
| H  | 0.00000000  | -7.24287900 | 2.07374900  |
| H  | 2.14576000  | -4.97652800 | 1.60625200  |
| C  | 2.54804500  | -2.39900900 | 2.35495800  |
| H  | 2.67387300  | -1.56559900 | 1.65329000  |
| H  | 3.38474400  | -3.08835500 | 2.20996600  |
| H  | 2.63035700  | -1.98319400 | 3.36623900  |
| Cu | 0.00000000  | 0.00000000  | 0.00000000  |
| N  | -1.07761300 | 0.00000000  | -2.75815400 |
| C  | 0.00000000  | 0.00000000  | -1.92251400 |
| N  | 1.07761300  | 0.00000000  | -2.75815400 |
| C  | 0.67921400  | 0.00000000  | -4.09010300 |
| C  | -0.67921400 | 0.00000000  | -4.09010300 |
| H  | 1.39284200  | 0.00000000  | -4.90002100 |
| H  | -1.39284200 | 0.00000000  | -4.90002100 |
| C  | -2.45887500 | 0.00000000  | -2.32981200 |
| C  | -3.11084900 | -1.23142500 | -2.14429400 |
| C  | -4.45474500 | -1.20234400 | -1.75266100 |
| C  | -5.14572200 | 0.00000000  | -1.55563800 |
| C  | -4.45474500 | 1.20234400  | -1.75266100 |
| C  | -3.11084900 | 1.23142500  | -2.14429400 |
| C  | -2.39900900 | -2.54804500 | -2.35495800 |

|   |             |             |             |
|---|-------------|-------------|-------------|
| H | -1.56559900 | -2.67387300 | -1.65329000 |
| H | -1.98319400 | -2.63035700 | -3.36623900 |
| H | -3.08835500 | -3.38474400 | -2.20996600 |
| H | -4.97652800 | -2.14576000 | -1.60625200 |
| C | -6.60871100 | 0.00000000  | -1.17725800 |
| H | -7.24287900 | 0.00000000  | -2.07374900 |
| H | -6.87297800 | 0.88696000  | -0.59182900 |
| H | -6.87297800 | -0.88696000 | -0.59182900 |
| H | -4.97652800 | 2.14576000  | -1.60625200 |
| C | -2.39900900 | 2.54804500  | -2.35495800 |
| H | -1.56559900 | 2.67387300  | -1.65329000 |
| H | -3.08835500 | 3.38474400  | -2.20996600 |
| H | -1.98319400 | 2.63035700  | -3.36623900 |
| C | 2.45887500  | 0.00000000  | -2.32981200 |
| C | 3.11084900  | 1.23142500  | -2.14429400 |
| C | 4.45474500  | 1.20234400  | -1.75266100 |
| C | 5.14572200  | 0.00000000  | -1.55563800 |
| C | 4.45474500  | -1.20234400 | -1.75266100 |
| C | 3.11084900  | -1.23142500 | -2.14429400 |
| C | 2.39900900  | 2.54804500  | -2.35495800 |
| H | 1.56559900  | 2.67387300  | -1.65329000 |
| H | 1.98319400  | 2.63035700  | -3.36623900 |
| H | 3.08835500  | 3.38474400  | -2.20996600 |
| H | 4.97652800  | 2.14576000  | -1.60625200 |
| C | 6.60871100  | 0.00000000  | -1.17725800 |
| C | 6.87297800  | -0.88696000 | -0.59182900 |
| H | 6.87297800  | 0.88696000  | -0.59182900 |
| H | 7.24287900  | 0.00000000  | -2.07374900 |
| H | 4.97652800  | -2.14576000 | -1.60625200 |
| C | 2.39900900  | -2.54804500 | -2.35495800 |
| H | 1.56559900  | -2.67387300 | -1.65329000 |
| H | 3.08835500  | -3.38474400 | -2.20996600 |
| H | 1.98319400  | -2.63035700 | -3.36623900 |

Thermal correction to Gibbs Free Energy= 0.704325

PCM energy (toluene) = -2046.14881300

PCM energy (DMF) = -2046.16865742

### IMes-Cu-Cl

|    |             |             |             |
|----|-------------|-------------|-------------|
| N  | 0.00000000  | 1.07746100  | -1.22776400 |
| C  | 0.00000000  | 0.00000000  | -0.38742400 |
| N  | 0.00000000  | -1.07746100 | -1.22776400 |
| C  | 0.00000000  | -0.67899800 | -2.56108200 |
| C  | 0.00000000  | 0.67899800  | -2.56108200 |
| H  | 0.00000000  | -1.39295200 | -3.37059700 |
| H  | 0.00000000  | 1.39295200  | -3.37059700 |
| C  | 0.00000000  | 2.45588300  | 0.79591900  |
| C  | -1.23014100 | 3.10560200  | -0.59985800 |
| C  | -1.20206600 | 4.44680700  | -0.20074300 |
| C  | 0.00000000  | 5.13338600  | 0.02746300  |
| C  | 1.20206600  | 4.44680700  | -0.20074300 |
| C  | 1.23014100  | 3.10560200  | -0.59985800 |
| C  | -2.54483300 | 2.38497900  | -0.78669900 |
| H  | -2.65789300 | 1.57630600  | -0.05446100 |
| H  | -2.62976200 | 1.93371800  | -1.78253900 |
| H  | -3.38382400 | 3.07509000  | -0.65676200 |
| H  | -2.14590400 | 4.96436500  | -0.04178300 |
| C  | 0.00000000  | 6.56953200  | 0.47872600  |
| H  | -0.88704400 | 7.10766300  | 0.12703300  |
| H  | 0.88704400  | 7.10766300  | 0.12703300  |
| H  | 0.00000000  | 6.61968300  | 1.57589700  |
| H  | 2.14590400  | 4.96436500  | -0.04178300 |
| H  | 2.54483300  | 2.38497900  | -0.78669900 |
| C  | 2.65789300  | 1.57630600  | -0.05446100 |
| H  | 3.38382400  | 3.07509000  | -0.65676200 |
| H  | 2.62976200  | 1.93371800  | -1.78253900 |
| C  | 0.00000000  | -2.45588300 | -0.79591900 |
| C  | 1.23014100  | -3.10560200 | -0.59985800 |
| C  | 1.20206600  | -4.44680700 | -0.20074300 |
| C  | 0.00000000  | -5.13338600 | 0.02746300  |
| C  | -1.20206600 | -4.44680700 | -0.20074300 |
| C  | -1.23014100 | -3.10560200 | -0.59985800 |
| C  | -2.54483300 | -2.38497900 | -0.78669900 |
| H  | -2.65789300 | -1.57630600 | -0.05446100 |
| H  | -2.62976200 | -1.93371800 | -1.78253900 |
| H  | -3.38382400 | -3.07509000 | -0.65676200 |
| H  | -2.14590400 | -4.96436500 | -0.04178300 |
| C  | 0.00000000  | -6.56953200 | 0.47872600  |
| H  | -0.88704400 | -7.10766300 | 0.12703300  |
| H  | 0.88704400  | -7.10766300 | 0.12703300  |
| H  | 0.00000000  | -6.61968300 | 1.57589700  |
| H  | 2.14590400  | -4.96436500 | -0.04178300 |
| H  | 2.54483300  | -2.38497900 | -0.78669900 |
| C  | 2.65789300  | -1.57630600 | -0.05446100 |
| H  | 3.38382400  | -3.07509000 | -0.65676200 |
| H  | 2.62976200  | -1.93371800 | -1.78253900 |
| Cu | 0.00000000  | 0.00000000  | 1.50287200  |
| Cl | 0.00000000  | 0.00000000  | 3.62931400  |

Thermal correction to Gibbs Free Energy= 0.338089

PCM energy (toluene) = -1582.12965948

PCM energy (DMF) = -1582.14034486

### IMes-Cu-I

|    |             |             |             |
|----|-------------|-------------|-------------|
| N  | 0.0000000   | 1.07733200  | -1.83577600 |
| C  | 0.0000000   | 0.00000000  | -0.99631100 |
| N  | 0.0000000   | -1.07733200 | -1.83577600 |
| C  | 0.0000000   | -0.67907500 | -3.16911500 |
| C  | 0.0000000   | 0.67907500  | -3.16911500 |
| H  | 0.0000000   | -1.39303700 | -3.97864500 |
| H  | 0.0000000   | 1.39303700  | -3.97864500 |
| C  | 0.0000000   | 2.45567800  | -1.40298900 |
| C  | -1.23026000 | 3.10502700  | -1.20630500 |
| C  | -1.20207900 | 4.44585700  | -0.80600000 |
| C  | 0.0000000   | 5.13216700  | -0.59695100 |
| C  | 1.20207900  | 4.44585700  | -0.80600000 |
| C  | 1.23026000  | 3.10502700  | -1.20630500 |
| C  | -2.54516500 | 2.38482800  | -1.39365700 |
| H  | -2.66040400 | 1.57818500  | -0.65949100 |
| H  | -2.62887800 | 1.93117200  | -2.38848100 |
| H  | -3.38381300 | 3.07588700  | -1.26677300 |
| H  | -2.14587700 | 4.96324500  | -0.64639200 |
| C  | 0.0000000   | 6.56761500  | -0.12370100 |
| H  | -0.88705900 | 7.10622700  | -0.47457600 |
| H  | 0.88705900  | 7.10622700  | -0.47457600 |
| H  | 0.0000000   | 6.61600500  | 0.97353200  |
| H  | 2.14587700  | 4.96324500  | -0.64639200 |
| C  | 2.54516500  | 2.38482800  | -1.39365700 |
| C  | 2.66040400  | 1.57818500  | -0.65949100 |
| H  | 3.38381300  | 3.07588700  | -1.26677300 |
| H  | 2.62887800  | 1.93117200  | -2.38848100 |
| C  | 0.0000000   | -2.45567800 | -1.40298900 |
| C  | 1.23026000  | -3.10502700 | -1.20630500 |
| C  | 1.20207900  | -4.44585700 | -0.80600000 |
| C  | 0.0000000   | -5.13216700 | -0.59695100 |
| C  | -1.20207900 | -4.44585700 | -0.80600000 |
| C  | -1.23026000 | -3.10502700 | -1.20630500 |
| C  | 2.54516500  | -2.38482800 | -1.39365700 |
| H  | 2.66040400  | -1.57818500 | -0.65949100 |
| H  | 2.62887800  | -1.93117200 | -2.38848100 |
| H  | 3.38381300  | -3.07588700 | -1.26677300 |
| H  | 2.14587700  | -4.96324500 | -0.64639200 |
| C  | 0.0000000   | -6.56761500 | -0.12370100 |
| H  | -0.88705900 | -7.10622700 | -0.47457600 |
| H  | 0.88705900  | -6.61600500 | 0.97353200  |
| H  | 0.88705900  | -7.10622700 | -0.47457600 |
| H  | -2.14587700 | -4.96324500 | -0.64639200 |
| C  | -2.54516500 | -2.38482800 | -1.39365700 |
| H  | -2.66040400 | -1.57818500 | -0.65949100 |
| H  | -3.38381300 | -3.07588700 | -1.26677300 |
| H  | -2.62887800 | -1.93117200 | -2.38848100 |
| Cu | 0.0000000   | 0.00000000  | 0.90884300  |
| I  | 0.0000000   | 0.00000000  | 3.36474600  |

Thermal correction to Gibbs Free Energy= 0.335481  
PCM energy (toluene) = -1133.32218200  
PCM energy (DMF) = -1133.33130983

### IPr-Cu<sup>+</sup>

|   |             |             |             |
|---|-------------|-------------|-------------|
| N | 0.0000000   | 1.08406600  | -0.74802600 |
| C | 0.0000000   | 0.00000000  | 0.06824000  |
| N | 0.0000000   | -1.08406600 | -0.74802600 |
| C | 0.0000000   | -0.68094700 | -2.07511600 |
| C | 0.0000000   | 0.68094700  | -2.07511600 |
| H | 0.0000000   | -1.39355700 | -2.88571000 |
| H | 0.0000000   | 1.39355700  | -2.88571000 |
| C | 0.0000000   | 2.46461600  | -0.29722900 |
| C | -1.24217100 | 3.10375400  | -0.09668100 |
| C | -1.20864200 | 4.43506600  | 0.34051100  |
| C | 0.0000000   | 5.09383600  | 0.55878100  |
| C | 1.20864200  | 4.43506600  | 0.34051100  |
| C | 1.24217100  | 3.10375400  | -0.09668100 |
| C | -2.58466200 | 2.41904400  | -0.34150700 |
| H | -2.39381400 | 1.39474100  | -0.67915300 |
| C | -3.41824000 | 2.32394700  | 0.95286600  |
| H | -2.87487100 | 1.79092800  | 1.74345400  |
| H | -4.35434500 | 1.78613200  | 0.76394300  |
| H | -3.67771800 | 3.31553400  | 1.34022100  |
| C | -3.38267500 | 3.12301200  | -1.45906300 |
| H | -2.80922300 | 3.17489800  | -2.39156000 |
| H | -3.65282200 | 4.14681900  | -1.17693000 |
| H | -4.31191100 | 2.57803300  | -1.66123800 |
| H | -2.14154600 | 4.96540700  | 0.50756200  |
| H | 0.0000000   | 6.12705300  | 0.89494800  |
| H | 2.14154600  | 4.96540700  | 0.50756200  |
| C | 2.58466200  | 2.41904400  | -0.34150700 |
| H | 2.39381400  | 1.39474100  | -0.67915300 |
| C | 3.41824000  | 2.32394700  | 0.95286600  |

|    |             |             |             |
|----|-------------|-------------|-------------|
| H  | 2.87487100  | 1.79092800  | 1.74345400  |
| H  | 3.67771800  | 3.31553400  | 1.34022100  |
| H  | 4.35434500  | 1.78613200  | 0.76394300  |
| C  | 3.38267500  | 3.12301200  | -1.45906300 |
| H  | 2.80922300  | 3.17489800  | -2.39156000 |
| H  | 4.31191100  | 2.57803300  | -1.66123800 |
| C  | 3.65282200  | 4.14681900  | -1.17693000 |
| C  | 0.0000000   | -2.46461600 | -0.29722900 |
| C  | 1.24217100  | -3.10375400 | -0.09668100 |
| C  | 1.20864200  | -4.43506600 | 0.34051100  |
| C  | 0.0000000   | -5.09383600 | 0.55878100  |
| C  | -1.20864200 | -4.43506600 | 0.34051100  |
| C  | -1.24217100 | -3.10375400 | -0.09668100 |
| C  | 2.58466200  | -2.41904400 | -0.34150700 |
| H  | 2.39381400  | -1.39474100 | -0.67915300 |
| C  | 3.41824000  | -2.32394700 | 0.95286600  |
| H  | 2.87487100  | -1.79092800 | 1.74345400  |
| H  | 4.35434500  | -1.78613200 | 0.76394300  |
| H  | 3.67771800  | -3.31553400 | 1.34022100  |
| C  | 3.38267500  | -3.12301200 | -1.45906300 |
| H  | 2.80922300  | -3.17489800 | -2.39156000 |
| H  | 3.65282200  | -4.14681900 | -1.17693000 |
| H  | 4.31191100  | -2.57803300 | -1.66123800 |
| H  | 2.14154600  | -4.96540700 | 0.50756200  |
| H  | 0.0000000   | -6.12705300 | 0.89494800  |
| H  | -2.14154600 | -4.96540700 | 0.50756200  |
| C  | -2.58466200 | -2.41904400 | -0.34150700 |
| H  | -2.39381400 | -1.39474100 | -0.67915300 |
| C  | -3.41824000 | -2.32394700 | 0.95286600  |
| H  | -2.87487100 | -1.79092800 | 1.74345400  |
| H  | -4.35434500 | -1.78613200 | 0.76394300  |
| H  | -3.67771800 | -3.31553400 | 1.34022100  |
| C  | -3.38267500 | -3.12301200 | -1.45906300 |
| H  | -2.80922300 | -3.17489800 | -2.39156000 |
| H  | -3.65282200 | -4.14681900 | -1.17693000 |
| H  | -4.31191100 | -2.57803300 | -1.66123800 |
| Cu | 0.0000000   | 0.00000000  | 1.94879300  |

Thermal correction to Gibbs Free Energy= 0.505459  
PCM energy (toluene) = -1357.56539592  
PCM energy (DMF) = -1357.59484415

### IPr-Cu<sup>+</sup>-IPr

|   |             |             |            |
|---|-------------|-------------|------------|
| N | -1.07456600 | 0.00000000  | 2.82750400 |
| C | 0.00000000  | 0.00000000  | 1.97534800 |
| N | 1.07456600  | 0.00000000  | 2.82750400 |
| C | 0.67745000  | 0.00000000  | 4.15628000 |
| C | -0.67745000 | 0.00000000  | 4.15628000 |
| H | 1.39150700  | 0.00000000  | 4.96466200 |
| H | -1.39150700 | 0.00000000  | 4.96466200 |
| C | -2.47114800 | 0.00000000  | 2.45106300 |
| C | -3.13075200 | 1.24149600  | 2.32965400 |
| C | -4.48000300 | 1.20987700  | 1.95086700 |
| C | -5.14125500 | 0.00000000  | 1.74147600 |
| C | -4.48000300 | -1.20987700 | 1.95086700 |
| C | -3.13075200 | -1.24149600 | 2.32965400 |
| C | -2.46825900 | 2.55958500  | 2.73320800 |
| C | -1.39458300 | 2.38032000  | 2.84839600 |
| H | -2.62233500 | 3.68811500  | 1.70013100 |
| H | -2.16093100 | 3.42623400  | 0.74419700 |
| H | -2.13192200 | 4.59595300  | 2.07086200 |
| H | -3.67359600 | 3.93770500  | 1.51569800 |
| C | -3.01096500 | 3.01382400  | 4.10781300 |
| H | -2.88263200 | 2.23994200  | 4.87318300 |
| H | -2.48586400 | 3.91525300  | 4.44531600 |
| H | -4.08044400 | 3.24854200  | 4.05069800 |
| H | -5.02774500 | 2.14139100  | 1.84098500 |
| H | -6.18792600 | 0.00000000  | 1.44848500 |
| H | -5.02774500 | -2.14139100 | 1.84098500 |
| H | -2.46825900 | -2.55958500 | 2.73320800 |
| C | -1.39458300 | -2.38032000 | 2.84839600 |
| C | -2.62233500 | -3.68811500 | 1.70013100 |
| C | -2.16093100 | -3.42623400 | 0.74419700 |
| C | -2.13192200 | -4.59595300 | 2.07086200 |
| H | -3.67359600 | -3.93770500 | 1.51569800 |
| H | -3.01096500 | -3.01382400 | 4.10781300 |
| H | -2.88263200 | -2.23994200 | 4.87318300 |
| H | -2.48586400 | -3.91525300 | 4.44531600 |
| H | -4.08044400 | -3.24854200 | 4.05069800 |
| C | 2.47114800  | 0.00000000  | 2.45106300 |
| C | 3.13075200  | -1.24149600 | 2.32965400 |
| C | 4.48000300  | -1.20987700 | 1.95086700 |
| C | 5.14125500  | 0.00000000  | 1.74147600 |
| C | 4.48000300  | 1.20987700  | 1.95086700 |
| C | 3.13075200  | 1.24149600  | 2.32965400 |
| C | 2.46825900  | -2.55958500 | 2.73320800 |
| H | 1.39458300  | -2.38032000 | 2.84839600 |
| H | 2.62233500  | -3.68811500 | 1.70013100 |
| C | 2.16093100  | -3.42623400 | 0.74419700 |
| H | 2.13192200  | -4.59595300 | 2.07086200 |

|    |              |              |              |
|----|--------------|--------------|--------------|
| H  | 3. 67359600  | -3. 93770500 | 1. 51569800  |
| C  | 3. 01096500  | -3. 01382400 | 4. 10781300  |
| H  | 2. 88263200  | -2. 23994200 | 4. 87318300  |
| H  | 4. 08044400  | -3. 24854200 | 4. 05069800  |
| H  | 2. 48586400  | -3. 91525300 | 4. 44531600  |
| H  | 5. 02774500  | -2. 14139100 | 1. 84098500  |
| H  | 6. 18792600  | 0. 00000000  | 1. 44848500  |
| H  | 5. 02774500  | 2. 14139100  | 1. 84098500  |
| C  | 2. 46825900  | 2. 55958500  | 2. 73320800  |
| H  | 1. 39458300  | 2. 38032000  | 2. 84839600  |
| C  | 2. 62233500  | 3. 68811500  | 1. 70013100  |
| H  | 2. 16093100  | 3. 42623400  | 0. 74419700  |
| H  | 3. 67359600  | 3. 93770500  | 1. 51569800  |
| H  | 2. 13192200  | 4. 59595300  | 2. 07086200  |
| C  | 3. 01096500  | 3. 01382400  | 4. 10781300  |
| H  | 2. 88263200  | 2. 23994200  | 4. 87318300  |
| H  | 2. 48586400  | 3. 91525300  | 4. 44531600  |
| H  | 4. 08044400  | 3. 24854200  | 4. 05069800  |
| Cu | 0. 00000000  | 0. 00000000  | 0. 00000000  |
| N  | 0. 00000000  | -1. 07456600 | -2. 82750400 |
| C  | 0. 00000000  | 0. 00000000  | -1. 97534800 |
| N  | 0. 00000000  | 1. 07456600  | -2. 82750400 |
| C  | 0. 00000000  | 0. 67745000  | -4. 15628000 |
| C  | 0. 00000000  | -0. 67745000 | -4. 15628000 |
| H  | 0. 00000000  | 1. 39150700  | -4. 96466200 |
| H  | 0. 00000000  | -1. 39150700 | -4. 96466200 |
| C  | 0. 00000000  | -2. 47114800 | -2. 45106300 |
| C  | 1. 24149600  | -3. 13075200 | -2. 32965400 |
| C  | 1. 20987700  | -4. 48000300 | -1. 95086700 |
| C  | 0. 00000000  | -5. 14125500 | -1. 74147600 |
| C  | -1. 20987700 | -4. 48000300 | -1. 95086700 |
| C  | -1. 24149600 | -3. 13075200 | -2. 32965400 |
| C  | 2. 55958500  | -2. 46825900 | -2. 73320800 |
| H  | 2. 38032000  | -1. 39458300 | -2. 84839600 |
| C  | 3. 68811500  | -2. 62233500 | -1. 70013100 |
| H  | 3. 42623400  | -2. 16093100 | -0. 74419700 |
| H  | 4. 59595300  | -2. 13192200 | -2. 07086200 |
| H  | 3. 93770500  | -3. 67359600 | -1. 51569800 |
| C  | 3. 01382400  | -3. 01096500 | -4. 10781300 |
| H  | 2. 23994200  | -2. 88263200 | -4. 87318300 |
| H  | 3. 24854200  | -4. 08044400 | -4. 05069800 |
| H  | 3. 91525300  | -2. 48586400 | -4. 44531600 |
| H  | 2. 14139100  | -5. 02774500 | -1. 84098500 |
| H  | 0. 00000000  | -6. 18792600 | -1. 44848500 |
| H  | -2. 14139100 | -5. 02774500 | -1. 84098500 |
| C  | -2. 55958500 | -2. 46825900 | -2. 73320800 |
| H  | -2. 38032000 | -1. 39458300 | -2. 84839600 |
| C  | -3. 68811500 | -2. 62233500 | -1. 70013100 |
| H  | -3. 42623400 | -2. 16093100 | -0. 74419700 |
| H  | -3. 93770500 | -3. 67359600 | -1. 51569800 |
| H  | -4. 59595300 | -2. 13192200 | -2. 07086200 |
| C  | -3. 01382400 | -3. 01096500 | -4. 10781300 |
| H  | -2. 23994200 | -2. 88263200 | -4. 87318300 |
| H  | -3. 91525300 | -2. 48586400 | -4. 44531600 |
| H  | -3. 24854200 | -4. 08044400 | -4. 05069800 |
| C  | 0. 00000000  | 2. 47114800  | -2. 45106300 |
| C  | -1. 24149600 | 3. 13075200  | -2. 32965400 |
| C  | -1. 20987700 | 4. 48000300  | -1. 95086700 |
| C  | 0. 00000000  | 5. 14125500  | -1. 74147600 |
| C  | 1. 20987700  | 4. 48000300  | -1. 95086700 |
| C  | 1. 24149600  | 3. 13075200  | -2. 32965400 |
| C  | -2. 55958500 | 2. 46825900  | -2. 73320800 |
| H  | -2. 38032000 | 1. 39458300  | -2. 84839600 |
| C  | -3. 68811500 | 2. 62233500  | -1. 70013100 |
| H  | -3. 42623400 | 2. 16093100  | -0. 74419700 |
| H  | -4. 59595300 | 2. 13192200  | -2. 07086200 |
| H  | -3. 93770500 | 3. 67359600  | -1. 51569800 |
| C  | -3. 01382400 | 3. 01096500  | -4. 10781300 |
| H  | -2. 23994200 | 2. 88263200  | -4. 87318300 |
| H  | -3. 24854200 | 4. 08044400  | -4. 05069800 |
| H  | -3. 91525300 | 2. 48586400  | -4. 44531600 |
| H  | -2. 14139100 | 5. 02774500  | -1. 84098500 |
| H  | 0. 00000000  | 6. 18792600  | -1. 44848500 |
| H  | 2. 14139100  | 5. 02774500  | -1. 84098500 |
| C  | 2. 55958500  | 2. 46825900  | -2. 73320800 |
| H  | 2. 38032000  | 1. 39458300  | -2. 84839600 |
| C  | 3. 68811500  | 2. 62233500  | -1. 70013100 |
| H  | 3. 42623400  | 2. 16093100  | -0. 74419700 |
| H  | 3. 93770500  | 3. 67359600  | -1. 51569800 |
| H  | 4. 59595300  | 2. 13192200  | -2. 07086200 |
| C  | 3. 01382400  | 3. 01096500  | -4. 10781300 |
| H  | 2. 23994200  | 2. 88263200  | -4. 87318300 |
| H  | 3. 91525300  | 2. 48586400  | -4. 44531600 |
| H  | 3. 24854200  | 4. 08044400  | -4. 05069800 |

Thermal correction to Gibbs Free Energy= 1. 046337  
PCM energy (toluene) = -2517. 97985885  
PCM energy (DMF) = -2518. 00000191

### IPr-Cu-Cl

|    |              |              |              |
|----|--------------|--------------|--------------|
| N  | 0. 00000000  | 1. 07744000  | -1. 02095300 |
| C  | 0. 00000000  | 0. 00000000  | -0. 17944900 |
| N  | 0. 00000000  | -1. 07744000 | -1. 02095300 |
| C  | 0. 00000000  | -0. 67926700 | -2. 35278600 |
| C  | 0. 00000000  | 0. 67926700  | -2. 35278600 |
| H  | 0. 00000000  | -1. 39282000 | -3. 16234100 |
| H  | 0. 00000000  | 1. 39282000  | -3. 16234100 |
| C  | 0. 00000000  | 2. 46046400  | -0. 59475100 |
| C  | -1. 23804700 | 3. 10830200  | -0. 40448300 |
| C  | -1. 20739000 | 4. 45421800  | -0. 01537400 |
| C  | 0. 00000000  | 5. 12275100  | 0. 17598200  |
| C  | 1. 20739000  | 4. 45421800  | -0. 01537400 |
| C  | 1. 23804700  | 3. 10830200  | -0. 40448300 |
| C  | -2. 57886700 | 2. 40291800  | -0. 58684200 |
| H  | -2. 38219700 | 1. 37310400  | -0. 90070900 |
| C  | -3. 35943700 | 2. 33155300  | 0. 74186100  |
| H  | -2. 77264000 | 1. 83656000  | 1. 52300300  |
| H  | -4. 29083500 | 1. 76869500  | 0. 60372100  |
| C  | -3. 62553100 | 3. 33189000  | 1. 10410700  |
| H  | -3. 42566300 | 3. 06265300  | -1. 69432500 |
| H  | -2. 88739700 | 3. 09155800  | -2. 64933500 |
| H  | -3. 69829800 | 4. 09238900  | -1. 43393900 |
| H  | -4. 35589000 | 2. 50130500  | -1. 84492700 |
| H  | -2. 14194300 | 4. 98384200  | 0. 14727900  |
| H  | 0. 00000000  | 6. 16577200  | 0. 48218600  |
| H  | 2. 14194300  | 4. 98384200  | 0. 14727900  |
| C  | 2. 57886700  | 2. 40291800  | -0. 58684200 |
| C  | 2. 38219700  | 1. 37310400  | -0. 90070900 |
| H  | 3. 35943700  | 2. 33155300  | 0. 74186100  |
| H  | 2. 77264000  | 1. 83656000  | 1. 52300300  |
| H  | 3. 62553100  | 3. 33189000  | 1. 10410700  |
| H  | 4. 29083500  | 1. 76869500  | 0. 60372100  |
| C  | 3. 42566300  | 3. 06265300  | -1. 69432500 |
| H  | 2. 88739700  | 3. 09155800  | -2. 64933500 |
| H  | 3. 69829800  | 4. 09238900  | -1. 43393900 |
| H  | 4. 35589000  | 2. 50130500  | -1. 84492700 |
| H  | 2. 14194300  | 4. 98384200  | 0. 14727900  |
| H  | 0. 00000000  | -6. 16577200 | 0. 48218600  |
| H  | -2. 14194300 | -4. 98384200 | 0. 14727900  |
| C  | -2. 57886700 | -2. 40291800 | -0. 58684200 |
| H  | -2. 38219700 | -1. 37310400 | -0. 90070900 |
| H  | -3. 35943700 | -2. 33155300 | 0. 74186100  |
| C  | -2. 77264000 | -1. 83656000 | 1. 52300300  |
| H  | -3. 62553100 | -3. 33189000 | 1. 10410700  |
| H  | -4. 29083500 | -1. 76869500 | 0. 60372100  |
| C  | -3. 42566300 | -3. 06265300 | -1. 69432500 |
| H  | -2. 88739700 | -3. 09155800 | -2. 64933500 |
| H  | -3. 69829800 | -4. 09238900 | -1. 43393900 |
| H  | -4. 35589000 | -2. 50130500 | -1. 84492700 |
| H  | -2. 14194300 | -4. 98384200 | 0. 14727900  |
| Cu | 0. 00000000  | 0. 00000000  | 1. 71010300  |
| Cl | 0. 00000000  | 0. 00000000  | 3. 83642000  |

Thermal correction to Gibbs Free Energy= 0. 504570  
PCM energy (toluene) = -1818. 05714993  
PCM energy (DMF) = -1818. 06784999

### IPr-Cu-I

|   |              |              |              |
|---|--------------|--------------|--------------|
| N | 0. 00000000  | 1. 07728400  | -1. 55044800 |
| C | 0. 00000000  | 0. 00000000  | -0. 70950800 |
| N | 0. 00000000  | -1. 07728400 | -1. 55044800 |
| C | 0. 00000000  | -0. 67931800 | -2. 88225900 |
| C | 0. 00000000  | 0. 67931800  | -2. 88225900 |
| H | 0. 00000000  | -1. 39287300 | -3. 69183400 |
| H | 0. 00000000  | 1. 39287300  | -3. 69183400 |
| C | 0. 00000000  | 2. 46058000  | -1. 12438300 |
| C | -1. 23816300 | 3. 10842400  | -0. 93471300 |
| C | -1. 20739400 | 4. 45430400  | -0. 54550300 |
| C | 0. 00000000  | 5. 12269400  | -0. 35379900 |
| C | 1. 20739400  | 4. 45430400  | -0. 54550300 |
| C | 1. 23816300  | 3. 10842400  | -0. 93471300 |
| H | -2. 57924700 | 2. 40436300  | -1. 12060100 |
| H | -2. 38280700 | 1. 37179500  | -1. 42551600 |
| C | -3. 37018500 | 2. 34453600  | 0. 20242800  |
| H | -2. 79014900 | 1. 85577400  | 0. 99249400  |

|    |              |              |              |
|----|--------------|--------------|--------------|
| H  | -4. 30075200 | 1. 78104700  | 0. 06153500  |
| H  | -3. 63883800 | 3. 34778800  | 0. 55446900  |
| C  | -3. 41614500 | 3. 05826200  | -2. 23914200 |
| H  | -2. 87129800 | 3. 07774600  | -3. 19065100 |
| H  | -3. 68639000 | 4. 09104400  | -1. 98851500 |
| H  | -4. 34741800 | 2. 49919400  | -2. 39171600 |
| H  | -2. 14191700 | 4. 98404000  | -0. 38315100 |
| H  | 0. 00000000  | 6. 16560500  | -0. 04728900 |
| H  | 2. 14191700  | 4. 98404000  | -0. 38315100 |
| C  | 2. 57924700  | 2. 40436300  | -1. 12060100 |
| H  | 2. 38280700  | 1. 37179500  | -1. 42551600 |
| C  | 3. 37018500  | 2. 34453600  | 0. 20242800  |
| H  | 2. 79014900  | 1. 85577400  | 0. 99249400  |
| H  | 3. 63883800  | 3. 34778800  | 0. 55446900  |
| H  | 4. 30075200  | 1. 78104700  | 0. 06153500  |
| C  | 3. 41614500  | 3. 05826200  | -2. 23914200 |
| H  | 2. 87129800  | 3. 07774600  | -3. 19065100 |
| H  | 4. 34741800  | 2. 49919400  | -2. 39171600 |
| H  | 3. 68639000  | 4. 09104400  | -1. 98851500 |
| C  | 0. 00000000  | -2. 46058000 | -1. 12438300 |
| C  | 1. 23816300  | -3. 10842400 | -0. 93471300 |
| C  | 1. 20739400  | -4. 45430400 | -0. 54550300 |
| C  | 0. 00000000  | -5. 12269400 | -0. 35379900 |
| C  | -1. 20739400 | -4. 45430400 | -0. 54550300 |
| C  | -1. 23816300 | -3. 10842400 | -0. 93471300 |
| C  | 2. 57924700  | -2. 40436300 | -1. 12060100 |
| H  | 2. 38280700  | -1. 37179500 | -1. 42551600 |
| C  | 3. 37018500  | -2. 34453600 | 0. 20242800  |
| H  | 2. 79014900  | -1. 85577400 | 0. 99249400  |
| H  | 4. 30075200  | -1. 78104700 | 0. 06153500  |
| H  | 3. 63883800  | -3. 34778800 | 0. 55446900  |
| C  | 3. 41614500  | -3. 05826200 | -2. 23914200 |
| H  | 2. 87129800  | -3. 07774600 | -3. 19065100 |
| H  | 3. 68639000  | -4. 09104400 | -1. 98851500 |
| H  | 4. 34741800  | -2. 49919400 | -2. 39171600 |
| H  | 2. 14191700  | -4. 98404000 | -0. 38315100 |
| H  | 0. 00000000  | -6. 16560500 | -0. 04728900 |
| H  | -2. 14191700 | -4. 98404000 | -0. 38315100 |
| C  | -2. 57924700 | -2. 40436300 | -1. 12060100 |
| H  | -2. 38280700 | -1. 37179500 | -1. 42551600 |
| C  | -3. 37018500 | -2. 34453600 | 0. 20242800  |
| H  | -2. 79014900 | -1. 85577400 | 0. 99249400  |
| H  | -3. 63883800 | -3. 34778800 | 0. 55446900  |
| H  | -4. 30075200 | -1. 78104700 | 0. 06153500  |
| C  | -3. 41614500 | -3. 05826200 | -2. 23914200 |
| H  | -2. 87129800 | -3. 07774600 | -3. 19065100 |
| H  | -4. 34741800 | -2. 49919400 | -2. 39171600 |
| H  | -3. 68639000 | -4. 09104400 | -1. 98851500 |
| Cu | 0. 00000000  | 0. 00000000  | 1. 19561200  |
| I  | 0. 00000000  | 0. 00000000  | 3. 65054800  |

Thermal correction to Gibbs Free Energy= 0. 502160  
PCM energy (toluene) = -1369. 24952503  
PCM energy (DMF) = -1369. 25873494

### IMes-Cu-SPh

|   |              |              |              |
|---|--------------|--------------|--------------|
| N | -2. 10361700 | -1. 43450200 | 0. 06035000  |
| C | -0. 80632500 | -1. 00758800 | 0. 01371000  |
| N | -0. 07580000 | -2. 16169900 | 0. 04937400  |
| C | -0. 90032500 | -3. 28132000 | 0. 11672000  |
| H | -2. 17833800 | -2. 82281700 | 0. 12350900  |
| C | -0. 50107200 | -4. 28352200 | 0. 15261300  |
| H | -3. 12317300 | -3. 34293000 | 0. 16676700  |
| C | -3. 25410900 | -0. 56128300 | 0. 04624100  |
| C | -3. 76882800 | -0. 09670900 | 1. 26840000  |
| C | -4. 89477300 | 0. 73356900  | 1. 22740200  |
| C | -5. 49853600 | 1. 10522600  | 0. 02018800  |
| C | -4. 95313900 | 0. 61764600  | -1. 17334600 |
| C | -3. 82849100 | -0. 21549800 | -1. 18852000 |
| C | -3. 12318700 | -0. 45492500 | 2. 58650400  |
| H | -2. 11326500 | -0. 03300900 | 2. 65716700  |
| H | -3. 03089800 | -1. 53959800 | 2. 71871200  |
| H | -3. 71019700 | -0. 06204200 | 3. 42201800  |
| H | -5. 30472600 | 1. 10427200  | 2. 16468600  |
| C | -6. 68923700 | 2. 03615700  | 0. 00461100  |
| H | -7. 30223800 | 1. 91913800  | 0. 90500400  |
| H | -7. 32717400 | 1. 85761500  | -0. 86782400 |
| H | -6. 36411400 | 3. 08446300  | -0. 03606200 |
| H | -5. 40887500 | 0. 89722700  | -2. 12102400 |
| C | -3. 24738500 | -0. 70162100 | -2. 49574700 |
| H | -2. 23772500 | -0. 30237200 | -2. 65076400 |
| H | -3. 86862900 | -0. 37915200 | -3. 33662900 |
| H | -3. 17177300 | -1. 79506700 | -2. 53160600 |
| C | 1. 36673200  | -2. 22219400 | 0. 01803900  |
| C | 2. 01601300  | -2. 30190800 | -1. 22724000 |
| C | 3. 41202000  | -2. 38267600 | -1. 22956600 |
| C | 4. 15753500  | -2. 38147600 | -0. 04295900 |
| C | 3. 47059200  | -2. 29806900 | 1. 17261800  |
| C | 2. 07301500  | -2. 21547800 | 1. 23130600  |
| C | 1. 24249900  | -2. 27839500 | -2. 52483500 |

|    |              |              |              |
|----|--------------|--------------|--------------|
| H  | 0. 72742200  | -1. 31950400 | -2. 65905000 |
| H  | 0. 47820500  | -3. 06388800 | -2. 56223900 |
| H  | 1. 91467800  | -2. 42062200 | -3. 37622600 |
| C  | 3. 93053300  | -2. 44011900 | -2. 18466400 |
| H  | 5. 66692500  | -2. 45284700 | -0. 08458300 |
| H  | 6. 01029000  | -3. 29043500 | -0. 70384900 |
| H  | 6. 08981000  | -2. 57782800 | 0. 91745100  |
| H  | 6. 09272500  | -1. 53697700 | -0. 51434300 |
| H  | 4. 03342900  | -2. 28981400 | -2. 10354900 |
| C  | 1. 36371500  | -2. 10292200 | 2. 56066100  |
| H  | 0. 83277100  | -1. 14715800 | 2. 64563300  |
| H  | 2. 08002100  | -2. 16364300 | 3. 38534000  |
| H  | 0. 62128200  | -2. 89818900 | 2. 69894200  |
| Cu | -0. 18447700 | 0. 79433500  | -0. 07980600 |
| S  | 0. 33316600  | 2. 89849600  | -0. 20251100 |
| C  | 2. 10133600  | 3. 07419600  | -0. 06534900 |
| C  | 2. 99752300  | 1. 99962000  | 0. 09814200  |
| C  | 4. 37334100  | 2. 21879300  | 0. 20316400  |
| C  | 4. 89718400  | 3. 51433900  | 0. 14668300  |
| C  | 4. 01766600  | 4. 59039800  | -0. 01735300 |
| C  | 2. 64243600  | 4. 37515800  | -0. 12161100 |
| H  | 2. 61209500  | 0. 98436900  | 0. 14375100  |
| H  | 5. 03881000  | 1. 36711400  | 0. 33138500  |
| H  | 5. 96812300  | 3. 68238500  | 0. 22903300  |
| H  | 4. 40337400  | 5. 60682700  | -0. 06422500 |
| H  | 1. 97022800  | 5. 21995000  | -0. 24781700 |

Thermal correction to Gibbs Free Energy= 0. 417988  
PCM energy (toluene) = -1751. 79766135  
PCM energy (DMF) = -1751. 80776551

### (IMes-Cu-SPh)<sub>2</sub>

|    |              |              |              |
|----|--------------|--------------|--------------|
| N  | 4. 40407100  | 0. 90349900  | 0. 03358800  |
| C  | 3. 43725600  | -0. 06801700 | 0. 00915100  |
| N  | 4. 15724100  | -1. 23240000 | -0. 04044400 |
| C  | 5. 53025600  | -0. 98868500 | -0. 04741700 |
| H  | 5. 68488000  | 0. 35776600  | -0. 00063300 |
| C  | 6. 25274700  | -1. 78985400 | -0. 08513600 |
| H  | 6. 57018100  | 0. 97533300  | 0. 01148300  |
| Cu | 1. 54221400  | 0. 32344700  | 0. 03350700  |
| S  | 0. 04946100  | 0. 97951400  | 1. 75710800  |
| C  | -0. 04936500 | -0. 23983300 | 3. 05834300  |
| C  | -0. 00029300 | -1. 62563300 | 2. 81173800  |
| C  | -0. 07697900 | -2. 54464000 | 3. 86133300  |
| C  | -0. 20571900 | -2. 10799700 | 5. 18430500  |
| C  | -0. 25645500 | -0. 73359700 | 5. 44237600  |
| C  | -0. 17891000 | 0. 18783200  | 4. 39487700  |
| H  | 0. 09774400  | -1. 97974300 | 1. 78934800  |
| H  | -0. 03582800 | -3. 60956500 | 3. 64043200  |
| H  | -0. 26430100 | -2. 82516900 | 5. 99943200  |
| H  | -0. 35496600 | -0. 37434600 | 6. 46475900  |
| H  | -0. 21569600 | 1. 25374800  | 4. 60485100  |
| N  | -4. 24742200 | 1. 44962100  | -0. 03449900 |
| C  | -3. 41281100 | 0. 36236500  | -0. 01008600 |
| N  | -4. 27604400 | -0. 70071200 | 0. 02789200  |
| C  | -5. 60671100 | -0. 28332000 | 0. 02789700  |
| C  | -5. 58765700 | 1. 07202200  | -0. 01163700 |
| H  | -6. 42587200 | -0. 98576700 | 0. 05633900  |
| H  | -6. 38668000 | 1. 79773700  | -0. 02536500 |
| Cu | -1. 48373700 | 0. 51361200  | -0. 02110600 |
| S  | 0. 07991400  | 1. 00010400  | -1. 73935000 |
| C  | 0. 01916200  | -0. 20631600 | -3. 05464500 |
| C  | 0. 17762100  | 0. 22005100  | -4. 38851800 |
| C  | 0. 13419300  | -0. 69127300 | -5. 44676600 |
| C  | -0. 06966300 | -2. 05396900 | -5. 20246300 |
| C  | -0. 22855400 | -2. 48925000 | -3. 88232900 |
| C  | -0. 18476700 | -1. 58038200 | -2. 82204500 |
| H  | 0. 33354600  | 1. 27725100  | -4. 58767400 |
| H  | 0. 25871500  | -0. 33312800 | -6. 46670000 |
| H  | -0. 10484700 | -2. 76312200 | -6. 02590400 |
| H  | -0. 38760900 | -3. 54518500 | -3. 67195000 |
| H  | -0. 30822800 | -1. 93350700 | -1. 80208600 |
| C  | -3. 80569200 | 2. 82270700  | -0. 08010700 |
| C  | -3. 61074400 | 3. 43274400  | -1. 33205700 |
| C  | -3. 60610600 | 3. 51277200  | 1. 12678200  |
| C  | -3. 21991300 | 4. 77584300  | -1. 34901100 |
| C  | -3. 21464900 | 4. 85571800  | 1. 05366900  |
| C  | -3. 01631700 | 5. 50363100  | -0. 16999600 |
| H  | -3. 06305000 | 5. 26192400  | -2. 31022400 |
| H  | -3. 05447800 | 5. 40380400  | 1. 98006000  |
| C  | -3. 88669300 | -2. 08780100 | 0. 06567400  |
| C  | -3. 76169000 | -2. 79027800 | -1. 14401800 |
| C  | -3. 68279400 | -2. 70212500 | 1. 31394500  |
| C  | -3. 41625800 | -4. 14673600 | -1. 07812700 |
| C  | -3. 33885800 | -4. 05873300 | 1. 32388600  |
| C  | -3. 20422400 | -4. 79814500 | 0. 14188100  |
| H  | -3. 31242300 | -4. 70455800 | -2. 00679600 |
| H  | -3. 17259300 | -4. 54753400 | 2. 28204300  |
| C  | 3. 59057500  | -2. 55680200 | -0. 08154000 |



|   |              |              |              |
|---|--------------|--------------|--------------|
| C | 3. 37856500  | -3. 24137900 | 1. 12709600  |
| C | 3. 30989000  | -3. 13672800 | -1. 33051400 |
| C | 2. 85897600  | -4. 54013700 | 1. 05851600  |
| C | 2. 79169900  | -4. 43747300 | -1. 34325600 |
| C | 2. 55610400  | -5. 15303600 | -0. 16315900 |
| H | 2. 69095400  | -5. 08499100 | 1. 98560900  |
| H | 2. 56922100  | -4. 90070200 | -2. 30259300 |
| C | 4. 14175500  | 2. 32149500  | 0. 08873900  |
| C | 4. 02424400  | 3. 03793100  | -1. 11366500 |
| C | 4. 03389400  | 2. 94450600  | 1. 34467900  |
| C | 3. 80783800  | 4. 41930000  | -1. 03170000 |
| C | 3. 81754300  | 4. 32649200  | 1. 37052800  |
| C | 3. 70082400  | 5. 08053400  | 0. 19636600  |
| H | 3. 71321700  | 4. 98838500  | -1. 95445500 |
| H | 3. 73011800  | 4. 82340200  | 2. 33499600  |
| C | -3. 81868700 | -1. 92884000 | 2. 60396400  |
| H | -3. 05568900 | -1. 14610500 | 2. 67774400  |
| H | -4. 79720900 | -1. 43968900 | 2. 68188600  |
| H | -3. 69938500 | -2. 59176500 | 3. 46579100  |
| C | -3. 97980200 | -2. 11271600 | -2. 47634200 |
| H | -4. 96928900 | -1. 64363800 | -2. 53678700 |
| H | -3. 23554600 | -1. 32697500 | -2. 64732600 |
| H | -3. 89645900 | -2. 83441000 | -3. 29440600 |
| C | -2. 86554800 | -6. 27142200 | 0. 18934600  |
| H | -3. 74426500 | -6. 87094700 | 0. 46338800  |
| H | -2. 51188100 | -6. 63271300 | -0. 78231800 |
| H | -2. 08792700 | -6. 48035900 | 0. 93347700  |
| C | -3. 76571500 | 2. 83026000  | 2. 46447900  |
| H | -4. 72060000 | 2. 29828600  | 2. 54669400  |
| H | -2. 96573000 | 2. 09523800  | 2. 61719400  |
| C | -3. 71259700 | 3. 56064600  | 3. 27803200  |
| H | -3. 77419000 | 2. 66231000  | -2. 62048500 |
| H | -2. 96878300 | 1. 92553500  | -2. 72983200 |
| H | -4. 72502700 | 2. 11836900  | -2. 65988100 |
| H | -3. 73258900 | 3. 33747200  | -3. 48101300 |
| C | -2. 56536200 | 6. 94592700  | -0. 22343000 |
| H | -1. 49108400 | 7. 01349500  | -0. 44188900 |
| H | -3. 09128900 | 7. 50240200  | -1. 00819100 |
| H | -2. 74042400 | 7. 45624700  | 0. 72981600  |
| C | 3. 55259900  | -2. 38830400 | -2. 61958400 |
| C | 2. 90181800  | -1. 51018400 | -2. 69517300 |
| H | 4. 58820400  | -2. 03514700 | -2. 69466900 |
| C | 3. 34763000  | -3. 02886300 | -3. 48221600 |
| C | 3. 69404200  | -2. 60400000 | 2. 45974000  |
| H | 4. 73922300  | -2. 27650300 | 2. 51670400  |
| H | 3. 06658500  | -1. 72309400 | 2. 63522900  |
| H | 3. 51475100  | -3. 30912400 | 3. 27681200  |
| C | 1. 96800000  | -6. 54558300 | -0. 20730700 |
| H | 2. 28772000  | -7. 08793200 | -1. 10428500 |
| H | 2. 26338400  | -7. 13390600 | 0. 66856300  |
| H | 0. 87011700  | -6. 50903700 | -0. 22246100 |
| C | 4. 08670200  | 2. 34753200  | -2. 45532400 |
| H | 4. 96574100  | 1. 69909300  | -2. 54692400 |
| H | 3. 19871400  | 1. 72085700  | -2. 60471600 |
| C | 4. 12097700  | 3. 08281800  | -3. 26546200 |
| H | 4. 10667100  | 2. 15263900  | 2. 62845800  |
| H | 3. 21614200  | 1. 52172900  | 2. 73950700  |
| H | 4. 98219600  | 1. 49380600  | 2. 65942600  |
| H | 4. 15471100  | 2. 82298700  | 3. 49239800  |
| C | 3. 43579300  | 6. 56789700  | 0. 25879700  |
| H | 4. 00644600  | 7. 04416400  | 1. 06463900  |
| H | 3. 69993900  | 7. 06215500  | -0. 68237700 |
| H | 2. 37311200  | 6. 76932200  | 0. 45018500  |

Thermal correction to Gibbs Free Energy= 0. 858038  
PCM energy (toluene) = -3503. 59482097  
PCM energy (DMF) = -3503. 60672611

### IPr-Cu-SPh

|   |             |              |              |
|---|-------------|--------------|--------------|
| N | 2. 09000600 | 0. 85383700  | 0. 05002500  |
| C | 0. 74184900 | 0. 62763400  | 0. 02458700  |
| N | 0. 19625200 | 1. 88011300  | 0. 07315900  |
| C | 1. 18087900 | 2. 86046900  | 0. 12727200  |
| C | 2. 37505900 | 2. 21308500  | 0. 11268800  |
| H | 0. 93926900 | 3. 91134900  | 0. 17060000  |
| H | 3. 38811700 | 2. 58395200  | 0. 14034900  |
| C | 3. 10000900 | -0. 18191300 | 0. 01564500  |
| C | 3. 55833300 | -0. 71938500 | 1. 23639900  |
| C | 4. 55053500 | -1. 70703300 | 1. 17272800  |
| C | 5. 06166300 | -2. 13894700 | -0. 04941900 |
| C | 4. 58641500 | -1. 59102700 | -1. 23912000 |
| C | 3. 59495100 | -0. 60064100 | -1. 23691700 |
| C | 3. 01198600 | -0. 28101700 | 2. 59223900  |
| H | 2. 25749600 | 0. 49307900  | 2. 42142900  |
| C | 2. 30996900 | -1. 44647800 | 3. 31910400  |
| H | 1. 50475200 | -1. 87005700 | 2. 70925900  |
| H | 1. 87592400 | -1. 09604400 | 4. 26366100  |
| H | 3. 01393400 | -2. 25342000 | 3. 55571700  |
| C | 4. 11256600 | 0. 34256600  | 3. 47495800  |

|    |              |              |              |
|----|--------------|--------------|--------------|
| H  | 4. 59670100  | 1. 19057100  | 2. 97582300  |
| H  | 4. 89218700  | -0. 38760800 | 3. 72311600  |
| H  | 3. 68313100  | 0. 70270700  | 4. 41782100  |
| H  | 4. 92284000  | -2. 14907000 | 2. 09269500  |
| H  | 5. 82804700  | -2. 90945800 | -0. 07505300 |
| H  | 4. 98630400  | -1. 94319200 | -2. 18591000 |
| C  | 3. 08660900  | -0. 03493100 | -2. 56000400 |
| H  | 2. 33074200  | 0. 72469800  | -2. 33774200 |
| C  | 2. 40002900  | -1. 12422500 | -3. 40963200 |
| H  | 1. 57742000  | -1. 59766300 | -2. 86298900 |
| H  | 3. 10730800  | -1. 91015200 | -3. 70091900 |
| H  | 1. 99262600  | -0. 68576800 | -4. 32897300 |
| C  | 4. 21204000  | 0. 66068000  | -3. 35286800 |
| H  | 4. 68687800  | 1. 45543200  | -2. 76507200 |
| H  | 3. 80838000  | 1. 10962500  | -4. 26861600 |
| C  | 4. 99464700  | -0. 04836300 | -3. 64838500 |
| H  | -1. 22271700 | 2. 16171100  | 0. 06948000  |
| C  | -1. 87047800 | 2. 35042400  | -1. 16925400 |
| C  | -3. 24160700 | 2. 63941200  | -1. 14120600 |
| C  | -3. 93403700 | 2. 73659800  | 0. 06413900  |
| C  | -3. 26662600 | 2. 54379000  | 1. 27208600  |
| C  | -1. 89622300 | 2. 25209200  | 1. 30557000  |
| C  | -1. 14603500 | 2. 24314400  | -2. 50825500 |
| H  | -0. 09344000 | 2. 01973100  | -2. 30890100 |
| C  | -1. 70337500 | 1. 08405000  | -3. 35976100 |
| H  | -1. 64076600 | 0. 12989100  | -2. 85895000 |
| H  | -1. 13269300 | 0. 99202600  | -4. 29203100 |
| C  | -2. 75353600 | 1. 25124700  | -3. 62745500 |
| H  | -1. 19000400 | 3. 57450900  | -3. 28605900 |
| H  | -0. 76892800 | 4. 39868300  | -2. 69783400 |
| H  | -2. 21646000 | 3. 84882300  | -3. 55742100 |
| H  | -0. 61267100 | 3. 48966800  | -4. 21781000 |
| H  | -3. 77574800 | 2. 78339600  | -2. 07622800 |
| H  | -4. 99822800 | 2. 95846800  | 0. 06189300  |
| H  | -3. 82017400 | 2. 61358700  | 2. 20426500  |
| C  | -1. 19977600 | 2. 03669200  | 2. 64638000  |
| C  | -0. 14238300 | 1. 83242300  | 2. 45194400  |
| H  | -1. 77045800 | 0. 81007500  | 3. 38727000  |
| H  | -1. 69144700 | -0. 09672700 | 2. 77835200  |
| H  | -2. 82712200 | 0. 95159200  | 3. 64390200  |
| H  | -1. 22013400 | 0. 64350700  | 4. 32144900  |
| C  | -1. 26472300 | 3. 29926200  | 3. 53021400  |
| H  | -0. 83553700 | 4. 17024500  | 3. 02050100  |
| H  | -0. 70540000 | 3. 13947500  | 4. 46007400  |
| H  | -2. 29736800 | 3. 54776700  | 3. 80295800  |
| Cu | -0. 14761400 | -1. 05882100 | -0. 05683000 |
| S  | -0. 97841100 | -3. 06172700 | -0. 14826300 |
| C  | -2. 75802800 | -2. 95693300 | -0. 12527400 |
| C  | -3. 48319900 | -1. 74983500 | -0. 09096400 |
| C  | -4. 88035600 | -1. 74874500 | -0. 07618100 |
| C  | -5. 59539600 | -2. 95040800 | -0. 09592600 |
| C  | -4. 88673200 | -4. 15669600 | -0. 13071000 |
| C  | -3. 49095100 | -4. 16128400 | -0. 14507700 |
| H  | -2. 94751000 | -0. 80426200 | -0. 07618700 |
| H  | -5. 41035500 | -0. 79862600 | -0. 04944600 |
| H  | -6. 68246800 | -2. 94750000 | -0. 08457300 |
| H  | -5. 42321200 | -5. 10325000 | -0. 14658800 |
| H  | -2. 95257400 | -5. 10515500 | -0. 17158000 |

Thermal correction to Gibbs Free Energy= 0. 583996  
PCM energy (toluene) = -1987. 72487536  
PCM energy (DMF) = -1987. 73502547

### (IPr-Cu-SPh)<sub>2</sub>

|    |              |              |              |
|----|--------------|--------------|--------------|
| N  | 4. 53582500  | 0. 41308900  | -0. 79662700 |
| C  | 3. 55089300  | -0. 05915100 | 0. 03801400  |
| N  | 4. 25746100  | -0. 54869400 | 1. 11092700  |
| C  | 5. 63031400  | -0. 38176600 | 0. 94185600  |
| C  | 5. 80452800  | 0. 21658100  | -0. 26067400 |
| H  | 6. 34154700  | -0. 70995900 | 1. 68346100  |
| H  | 6. 69863100  | 0. 52268100  | -0. 78064800 |
| Cu | 1. 65284500  | -0. 04469300 | -0. 35874600 |
| S  | 0. 03556100  | 1. 57414200  | -1. 04187900 |
| C  | 0. 06951200  | 3. 21923300  | -0. 35209600 |
| C  | 0. 22655700  | 3. 46241200  | 1. 02513300  |
| C  | 0. 27873800  | 4. 76679400  | 1. 52268000  |
| C  | 0. 16939200  | 5. 86310500  | 0. 65989900  |
| C  | 0. 00314800  | 5. 63460000  | -0. 71022900 |
| C  | -0. 04491300 | 4. 33057700  | -1. 21051700 |
| H  | 0. 30368600  | 2. 61844400  | 1. 70320100  |
| H  | 0. 40110900  | 4. 92648600  | 2. 59230600  |
| H  | 0. 21110500  | 6. 87755900  | 1. 04890000  |
| H  | -0. 08473300 | 6. 47489400  | -1. 39602500 |
| H  | -0. 16249700 | 4. 16011700  | -2. 27733500 |
| C  | -4. 53582400 | -0. 41311100 | -0. 79661700 |
| N  | -3. 55089100 | 0. 05914100  | 0. 03801700  |
| N  | -4. 25745900 | 0. 54868700  | 1. 11092900  |
| C  | -5. 63031100 | 0. 38175000  | 0. 94186400  |
| C  | -5. 80452600 | -0. 21660700 | -0. 26066100 |
| H  | -6. 34154400 | 0. 70994300  | 1. 68346900  |

|    |             |             |             |
|----|-------------|-------------|-------------|
| H  | -6.69862900 | -0.52271600 | -0.78062900 |
| Cu | -1.65284700 | 0.04470700  | -0.35875600 |
| S  | -0.03555500 | -1.57413000 | -1.04191900 |
| C  | -0.06951600 | -3.21920400 | -0.35209900 |
| C  | 0.04490000  | -4.33056800 | -1.21049700 |
| C  | -0.00316700 | -5.63458000 | -0.71018100 |
| C  | -0.16940700 | -5.86305600 | 0.65995200  |
| C  | -0.27874300 | -4.76672700 | 1.52271000  |
| C  | -0.22655700 | -3.46235500 | 1.02513600  |
| H  | 0.16248100  | -4.16013100 | -2.27731900 |
| H  | 0.08470700  | -6.47488900 | -1.39596000 |
| H  | -0.21112400 | -6.87750100 | 1.04897400  |
| H  | -0.40111100 | -4.92639500 | 2.59234000  |
| H  | -0.30367900 | -2.61837200 | 1.70318700  |
| C  | -4.31773700 | -1.06791100 | -2.06791100 |
| C  | -4.42739600 | -2.47391300 | -2.12377400 |
| C  | -4.05518900 | -0.27891200 | -3.20822900 |
| C  | -4.24111100 | -3.08784100 | -3.36942000 |
| C  | -3.87317400 | -0.94855800 | -4.42576300 |
| C  | -3.96024200 | -2.33655200 | -4.50819100 |
| H  | -4.31092700 | -4.16907300 | -3.44727000 |
| H  | -3.66244700 | -0.37471600 | -5.32320100 |
| C  | -3.70157400 | 1.25283500  | 2.24437000  |
| C  | -3.13679800 | 0.51186300  | 3.30591500  |
| C  | -3.80427400 | 2.65977500  | 2.26975400  |
| C  | -2.65015200 | 1.23080300  | 4.40546600  |
| C  | -3.30544100 | 3.32548800  | 3.39857500  |
| C  | -2.73132000 | 2.62236900  | 4.45349400  |
| H  | -2.20469400 | 0.69759100  | 5.23927000  |
| H  | -3.36204600 | 4.40918200  | 3.44635900  |
| C  | 3.70157600  | -1.25282800 | 2.24437700  |
| C  | 3.13680600  | -0.51184200 | 3.30591600  |
| C  | 3.80427200  | -2.65976800 | 2.26977600  |
| C  | 2.65016200  | -1.23076900 | 4.40547600  |
| C  | 3.30544200  | -3.32546700 | 3.39860600  |
| C  | 2.73132700  | -2.62233500 | 4.45352000  |
| H  | 2.20470900  | -0.69754600 | 5.23927600  |
| H  | 3.36204500  | -4.40916000 | 3.44640300  |
| C  | 4.31773600  | 1.06788300  | -2.06792400 |
| C  | 4.05519000  | 0.27887600  | -3.20823800 |
| C  | 4.42739300  | 2.47388500  | -2.12379400 |
| C  | 3.87317600  | 0.94851500  | -4.42577600 |
| C  | 4.24110700  | 3.08780500  | -3.36944400 |
| C  | 3.96024100  | 2.33650900  | -4.50821100 |
| H  | 3.66245000  | 0.37466800  | -5.32321100 |
| H  | 4.31092100  | 4.16903700  | -3.44730000 |
| H  | -4.46412500 | 3.46280800  | 1.15037600  |
| H  | -4.64774100 | 2.78713800  | 0.30988300  |
| C  | -3.11260800 | -1.01539000 | 3.30118500  |
| C  | -3.05594600 | -1.34520800 | 2.25919500  |
| C  | -4.04040600 | 1.24765800  | -3.16894100 |
| H  | -3.93758000 | 1.55955800  | -2.12592700 |
| C  | -4.77972600 | -3.32423000 | -0.90487700 |
| H  | -4.70295700 | -2.69088600 | -0.01564600 |
| C  | 4.46411700  | -3.46281500 | 1.15040400  |
| C  | 4.64773800  | -2.78715400 | 0.30990600  |
| C  | 3.11262300  | 1.01541100  | 3.30117000  |
| C  | 3.05596200  | 1.34521900  | 2.25917800  |
| H  | 4.04040800  | -1.24769300 | -3.16893900 |
| H  | 3.93757200  | -1.55958600 | -2.12592400 |
| C  | 4.77972000  | 3.32420900  | -0.90490200 |
| C  | 4.70294300  | 2.69087200  | -0.01566700 |
| H  | 3.81080300  | 2.83371300  | -5.46360100 |
| H  | 2.34626100  | -3.15794800 | 5.31802000  |
| H  | -3.81080300 | -2.83376200 | -5.46357800 |
| H  | -2.34625200 | 3.15799400  | 5.31798700  |
| C  | 3.56677100  | -4.59836800 | 0.62545100  |
| C  | 3.38887700  | -5.36505700 | 1.38862300  |
| H  | 2.59530200  | -4.22348400 | 0.29377000  |
| C  | 4.05294100  | -5.09056000 | -0.22604500 |
| H  | 5.83003400  | -4.02109800 | 1.60614700  |
| H  | 6.50448300  | -3.22685600 | 1.94706400  |
| H  | 5.70884900  | -4.73116700 | 2.43359800  |
| H  | 6.32003400  | -4.54980900 | 0.77917300  |
| C  | 1.89442700  | 1.61170400  | 4.02715800  |
| H  | 0.95479800  | 1.18516000  | 3.65998600  |
| H  | 1.94122900  | 1.45225300  | 5.11157400  |
| H  | 1.86205800  | 2.69441000  | 3.86104200  |
| C  | 4.41750700  | 1.58147000  | 3.90504200  |
| C  | 4.52378600  | 1.27793900  | 4.95441000  |
| H  | 5.30205500  | 1.23161600  | 3.36190900  |
| C  | 4.41109400  | 2.67799500  | 3.86756000  |
| H  | 5.38031200  | -1.80872100 | -3.69466100 |
| H  | 5.53374400  | -1.53876100 | -4.74719000 |
| H  | 6.23299300  | -1.42261800 | -3.12316300 |
| H  | 5.39063300  | -2.90355800 | -3.62202800 |
| C  | 2.85323900  | -1.86151300 | -3.93334500 |
| H  | 1.89834800  | -1.48473900 | -3.55445900 |
| H  | 2.90880900  | -1.66009800 | -5.01031200 |
| H  | 2.85757800  | -2.95084400 | -3.80491400 |
| C  | 6.23613700  | 3.83124300  | -0.99259100 |

|                                          |             |             |             |
|------------------------------------------|-------------|-------------|-------------|
| H                                        | 6.95182600  | 3.00736600  | -1.09734200 |
| H                                        | 6.36841100  | 4.49601300  | -1.85526000 |
| H                                        | 6.49901300  | 4.39594500  | -0.08931200 |
| C                                        | 3.81299200  | 4.50460900  | -0.70021900 |
| H                                        | 2.77522800  | 4.16829300  | -0.63460600 |
| H                                        | 4.06017000  | 5.03106400  | 0.22980500  |
| C                                        | 3.88195900  | 5.23448600  | -1.51592900 |
| C                                        | -5.83004700 | 4.02108300  | 1.60611500  |
| H                                        | -6.50448800 | 3.22683900  | 1.94703900  |
| H                                        | -5.70886700 | 4.73116000  | 2.43355900  |
| H                                        | -6.32005200 | 4.54978300  | 0.77913600  |
| C                                        | -3.56678900 | 4.59836400  | 0.62541300  |
| H                                        | -4.05296500 | 5.09054500  | -0.22608700 |
| H                                        | -3.38890200 | 5.36506100  | 1.38857800  |
| H                                        | -2.59531800 | 4.22348600  | 0.29373400  |
| C                                        | -4.41748900 | -1.58145000 | 3.90506100  |
| H                                        | -4.52377100 | -1.27790800 | 4.95442600  |
| H                                        | -5.30203900 | -1.23160500 | 3.36192400  |
| C                                        | -4.41107100 | -2.67797500 | 3.86759100  |
| H                                        | -1.89440900 | -1.61167100 | 4.02717800  |
| H                                        | -0.95478200 | -1.18512500 | 3.66000400  |
| H                                        | -1.94121300 | -1.45221300 | 5.11159300  |
| H                                        | -1.86203400 | -2.69437900 | 3.86107000  |
| C                                        | -5.38030600 | 1.80868300  | -3.69467900 |
| H                                        | -5.53372800 | 1.53871700  | -4.74720800 |
| H                                        | -6.23299100 | 1.42258400  | -3.12318600 |
| H                                        | -5.39062700 | 2.90352000  | -3.62205200 |
| C                                        | -2.85323100 | 1.86147200  | -3.93334100 |
| H                                        | -1.89834200 | 1.48470200  | -3.55444300 |
| H                                        | -2.90878900 | 1.66004700  | -5.01030600 |
| C                                        | -2.85757200 | 2.95080400  | -3.80492000 |
| H                                        | -6.23614000 | -3.83127200 | -0.99256900 |
| H                                        | -6.95183300 | -3.00740000 | -1.09733100 |
| H                                        | -6.36840600 | -4.49605000 | -1.85523300 |
| H                                        | -6.49901800 | -4.39596800 | -0.08928700 |
| C                                        | -3.81299200 | -4.50462300 | -0.70018000 |
| H                                        | -3.88195000 | -5.23450500 | -1.51588600 |
| H                                        | -2.77523100 | -4.16830000 | -0.63456300 |
| H                                        | -4.06017300 | -5.03107300 | 0.22984600  |
| Thermal correction to Gibbs Free Energy= |             |             | 1.202594    |
| PCM energy (toluene) = -3975.43572416    |             |             |             |
| PCM energy (DMF) = -3975.44960318        |             |             |             |

## SPH<sub>2</sub>

|                                          |             |             |             |
|------------------------------------------|-------------|-------------|-------------|
| S                                        | 0.00000000  | 0.00000000  | 1.62174200  |
| C                                        | 0.00000000  | 1.41041100  | 0.51076700  |
| C                                        | -0.88103100 | 1.50394700  | -0.57715600 |
| C                                        | -0.88846000 | 2.65175900  | -1.37091500 |
| C                                        | -0.03939400 | 3.72418000  | -1.07499700 |
| C                                        | 0.82734600  | 3.63689400  | 0.01662600  |
| C                                        | 0.85630500  | 2.48087000  | 0.80298300  |
| H                                        | -1.55462700 | 0.68194600  | -0.80129900 |
| H                                        | -1.56982000 | 2.71321000  | -2.21597600 |
| H                                        | -0.05470800 | 4.61909600  | -1.69147400 |
| H                                        | 1.49427200  | 4.46235500  | 0.25266200  |
| H                                        | 1.54716800  | 2.40486300  | 1.63830400  |
| C                                        | 0.00000000  | -1.41041100 | 0.51076700  |
| C                                        | 0.88103100  | -1.50394700 | -0.57715600 |
| C                                        | 0.88846000  | -2.65175900 | -1.37091500 |
| C                                        | 0.03939400  | -3.72418000 | -1.07499700 |
| C                                        | -0.82734600 | -3.63689400 | 0.01662600  |
| C                                        | -0.85630500 | -2.48087000 | 0.80298300  |
| H                                        | 1.55462700  | -0.68194600 | -0.80129900 |
| H                                        | 1.56982000  | -2.71321000 | -2.21597600 |
| H                                        | 0.05470800  | -4.61909600 | -1.69147400 |
| H                                        | -1.49427200 | -4.46235500 | 0.25266200  |
| H                                        | -1.54716800 | -2.40486300 | 1.63830400  |
| Thermal correction to Gibbs Free Energy= |             |             | 0.143432    |
| PCM energy (toluene) = -861.632140581    |             |             |             |
| PCM energy (DMF) = -861.634442028        |             |             |             |

## Iodobenzene

|                                          |            |             |             |
|------------------------------------------|------------|-------------|-------------|
| C                                        | 0.00000000 | 0.00000000  | -0.58090600 |
| C                                        | 0.00000000 | 1.21662000  | -1.26484500 |
| C                                        | 0.00000000 | 1.20860600  | -2.66428800 |
| C                                        | 0.00000000 | 0.00000000  | -3.36585200 |
| C                                        | 0.00000000 | -1.20860600 | -2.66428800 |
| C                                        | 0.00000000 | -1.21662000 | -1.26484500 |
| I                                        | 0.00000000 | 0.00000000  | 1.56855400  |
| H                                        | 0.00000000 | 2.15720800  | -0.72389000 |
| H                                        | 0.00000000 | 2.15365200  | -3.20149100 |
| H                                        | 0.00000000 | 0.00000000  | -4.45246000 |
| H                                        | 0.00000000 | -2.15365200 | -3.20149100 |
| H                                        | 0.00000000 | -2.15720800 | -0.72389000 |
| Thermal correction to Gibbs Free Energy= |            |             | 0.059017    |
| PCM energy (toluene) = -243.120462749    |            |             |             |

PCM energy (DMF) = -243.121998052

PCM energy (toluene) = -1994.87707465

PCM energy (DMF) = -1994.88501063

OA: oxidative addition  
 RE: reductive elimination  
 $\sigma$ BM:  $\sigma$ -bond metathesis  
 TS: transition state  
 IM: intermediate

**OA-TS: IMes-Cu-SPh/iodobenzene**

|                                          |             |             |             |
|------------------------------------------|-------------|-------------|-------------|
| N                                        | 1.27198300  | -2.37337000 | -0.95138700 |
| C                                        | 0.15367300  | -1.68469100 | -0.56695300 |
| N                                        | -0.86861200 | -2.54919800 | -0.84966600 |
| C                                        | -0.39589800 | -3.73970700 | -1.39503400 |
| C                                        | 0.95360100  | -3.63020100 | -1.45993100 |
| H                                        | -1.06322300 | -4.53827500 | -1.68148500 |
| H                                        | 1.71151300  | -4.31192500 | -1.81473200 |
| C                                        | 2.63426100  | -1.91603500 | -0.81011200 |
| C                                        | 3.24252300  | -1.22272000 | -1.87204600 |
| C                                        | 4.57709500  | -0.83176900 | -1.71033500 |
| C                                        | 5.30131800  | -1.11465700 | -0.54579300 |
| C                                        | 4.65820400  | -1.81223700 | 0.48300200  |
| C                                        | 3.32475500  | -2.22781000 | 0.37374300  |
| C                                        | 2.49481800  | -0.88573400 | -3.13958700 |
| H                                        | 1.78246900  | -0.06817900 | -2.97206500 |
| H                                        | 1.92537000  | -1.74076900 | -3.52053600 |
| H                                        | 3.19161200  | -0.56669000 | -3.92109400 |
| H                                        | 5.06151800  | -0.28961500 | -2.52026300 |
| C                                        | 6.74828900  | -0.69412300 | -0.41876400 |
| H                                        | 6.88098400  | 0.36366600  | -0.67589200 |
| H                                        | 7.38943700  | -1.27352100 | -1.09605400 |
| H                                        | 7.12151800  | -0.84386100 | 0.59973400  |
| C                                        | 5.20555300  | -2.04432900 | 1.39447700  |
| C                                        | 2.66094900  | -2.98095100 | 1.50421100  |
| H                                        | 1.79872100  | -2.43322500 | 1.90269200  |
| H                                        | 3.36652200  | -3.14233800 | 2.32490900  |
| H                                        | 2.29323000  | -3.96189400 | 1.17943600  |
| C                                        | -2.27391800 | -2.32741100 | -0.58713100 |
| C                                        | -2.79188200 | -2.72217400 | 0.65947100  |
| C                                        | -4.15646500 | -2.52090800 | 0.89381700  |
| C                                        | -4.99857000 | -1.96032400 | -0.07439500 |
| C                                        | -4.44922900 | -1.62338000 | -1.31591700 |
| C                                        | -3.08943300 | -1.80218300 | -1.60404400 |
| C                                        | -1.92079400 | -3.36725900 | 1.71198000  |
| H                                        | -1.10257900 | -2.70620600 | 2.01616700  |
| H                                        | -1.47117700 | -4.30006500 | 1.34862300  |
| H                                        | -2.50940100 | -3.60532700 | 2.60333600  |
| C                                        | -4.57058300 | -2.81462700 | 1.85639700  |
| H                                        | -6.46130200 | -1.71648500 | 0.21945700  |
| H                                        | -7.06312900 | -1.73581500 | -0.69569200 |
| H                                        | -6.60829000 | -0.73339000 | 0.68701300  |
| H                                        | -6.86368400 | -2.46792800 | 0.90811300  |
| H                                        | -5.09357200 | -1.21074100 | -2.08966000 |
| C                                        | -2.54296300 | -1.43817600 | -2.96254000 |
| H                                        | -1.90444800 | -0.54799700 | -2.89921900 |
| H                                        | -3.36060200 | -1.22065100 | -3.65708800 |
| C                                        | -1.94129600 | -2.24801500 | -3.39228100 |
| Cu                                       | 0.06813900  | 0.25921500  | 0.05732000  |
| S                                        | -0.33862000 | 1.39834200  | -1.90149600 |
| C                                        | -1.08824800 | 2.97859700  | -1.60731200 |
| C                                        | -2.28872200 | 3.10468700  | -0.87741200 |
| C                                        | -2.89515200 | 4.35074000  | -0.70172100 |
| C                                        | -2.32417900 | 5.50199300  | -1.25629700 |
| C                                        | -1.13529800 | 5.39049000  | -1.98619000 |
| C                                        | -0.52159200 | 4.14708700  | -2.15510800 |
| H                                        | -2.74459900 | 2.21342100  | -0.45477500 |
| H                                        | -3.82074800 | 4.42092700  | -0.13413400 |
| H                                        | -2.79992400 | 6.47056700  | -1.12390200 |
| H                                        | -0.68025000 | 6.27684300  | -2.42350800 |
| H                                        | 0.40593800  | 4.06775700  | -2.71539700 |
| C                                        | 0.92158800  | 1.71997200  | 1.24060400  |
| C                                        | 0.59363000  | 3.07897500  | 1.19704400  |
| C                                        | 1.62651300  | 4.01552700  | 1.15833600  |
| C                                        | 2.96629600  | 3.60685000  | 1.21045100  |
| C                                        | 3.27311600  | 2.24913600  | 1.31397400  |
| C                                        | 2.24942900  | 1.29404300  | 1.37048000  |
| I                                        | -0.67359300 | 0.36338800  | 2.60927700  |
| H                                        | -0.44034900 | 3.40171200  | 1.15534900  |
| H                                        | 1.37792800  | 5.07127900  | 1.08520400  |
| H                                        | 3.76218800  | 4.34672900  | 1.19062800  |
| H                                        | 4.30730400  | 1.91941300  | 1.37651900  |
| H                                        | 2.49628400  | 0.24579900  | 1.49686000  |
| Thermal correction to Gibbs Free Energy= |             |             | 0.500673    |

**OA-TS: IPr-Cu-SPh/iodobenzene**

|    |             |             |             |
|----|-------------|-------------|-------------|
| N  | 2.21270000  | 0.45408600  | 1.06825400  |
| C  | 1.00912000  | 0.80795300  | 0.51723700  |
| N  | 0.94226800  | 2.16019500  | 0.73661700  |
| C  | 2.07324400  | 2.62318800  | 1.40338200  |
| C  | 2.87218600  | 1.55048600  | 1.61518100  |
| H  | 2.19789200  | 3.66299700  | 1.65941700  |
| H  | 3.83455900  | 1.46027100  | 2.09407000  |
| C  | 2.79811500  | -0.86928700 | 1.06098700  |
| C  | 2.49718300  | -1.75530300 | 2.11790700  |
| C  | 3.12506300  | -3.00875200 | 2.10318400  |
| C  | 4.01388600  | -3.36167300 | 1.08970800  |
| C  | 4.29793400  | -2.46290400 | 0.06335900  |
| C  | 3.70036500  | -1.19523000 | 0.02445300  |
| C  | 1.57698300  | -1.37241800 | 3.27463100  |
| H  | 0.95675300  | -0.53170300 | 2.95037300  |
| C  | 0.61433900  | -2.50294000 | 3.68131400  |
| H  | 0.02968200  | -2.85405800 | 2.82632300  |
| H  | -0.09253600 | -2.12916600 | 4.43039900  |
| H  | 1.14471200  | -3.35505800 | 4.12444800  |
| C  | 2.40678900  | -0.90390300 | 4.49079000  |
| H  | 3.05666800  | -0.05734400 | 4.24024000  |
| H  | 3.04284300  | -1.71510500 | 4.86715200  |
| H  | 1.74204700  | -0.59007500 | 5.30482700  |
| H  | 2.91513600  | -3.71856500 | 2.89720700  |
| H  | 4.48976500  | -4.33928900 | 1.10161400  |
| H  | 4.99702500  | -2.74858800 | -0.71737100 |
| C  | 4.07479000  | -0.21444000 | -1.08538300 |
| H  | 3.37247900  | 0.62389100  | -1.04856300 |
| C  | 3.96375400  | -0.83304900 | -2.49233500 |
| H  | 2.95896000  | -1.22307900 | -2.68262300 |
| H  | 4.68288200  | -1.64761000 | -2.63959600 |
| H  | 4.17512600  | -0.07007700 | -3.25125400 |
| C  | 5.49226500  | 0.35407600  | -0.85612300 |
| H  | 5.58038600  | 0.84220300  | 0.12127800  |
| H  | 5.73601600  | 1.09470600  | -1.62768200 |
| H  | 6.24723900  | -0.44053700 | -0.90130200 |
| C  | -0.12513800 | 3.06031000  | 0.33537600  |
| C  | -0.08400900 | 3.61918800  | -0.96249500 |
| C  | -1.10100100 | 4.51837800  | -1.31026500 |
| C  | -2.10286400 | 4.86072100  | -0.40482200 |
| C  | -2.10079300 | 4.31753700  | 0.87672900  |
| C  | -1.11232100 | 3.40983200  | 1.28336700  |
| C  | 1.05138400  | 3.33401100  | -1.94519200 |
| H  | 1.44056600  | 2.33403500  | -1.72842800 |
| C  | 0.60390300  | 3.33521700  | -3.41858400 |
| H  | -0.27551200 | 2.70314200  | -3.57516600 |
| H  | 1.41381700  | 2.95104500  | -4.04971500 |
| H  | 0.36917700  | 4.34571500  | -3.77474700 |
| C  | 2.20441700  | 4.34671500  | -1.75727000 |
| H  | 2.61005700  | 4.32550600  | -0.74072400 |
| H  | 1.85811800  | 5.36779600  | -1.96069200 |
| H  | 3.02472100  | 4.12357600  | -2.45116600 |
| H  | -1.10947300 | 4.95913900  | -2.30179400 |
| H  | -2.88443300 | 5.55736700  | -0.69819100 |
| H  | -2.88274800 | 4.59951200  | 1.57436100  |
| C  | -1.10260600 | 2.89843300  | 2.72297700  |
| C  | -0.52808800 | 1.96739600  | 2.74584800  |
| H  | -2.50745900 | 2.57161700  | 3.26183600  |
| H  | -3.03968200 | 1.89189100  | 2.59201200  |
| H  | -3.11029100 | 3.47622700  | 3.41032800  |
| H  | -2.41851600 | 2.07725800  | 4.23636900  |
| C  | -0.41232000 | 3.91768600  | 3.65857400  |
| H  | 0.61620900  | 4.13611800  | 3.35178200  |
| H  | -0.38134200 | 3.52919500  | 4.68414200  |
| H  | -0.96408700 | 4.86603300  | 3.67404500  |
| Cu | -0.41047000 | -0.47250500 | -0.21269400 |
| S  | -1.93348500 | -0.59350300 | 1.49806400  |
| C  | -3.55020800 | -0.98099300 | 0.88109700  |
| C  | -4.15709800 | -0.22337300 | -0.14296700 |
| C  | -5.45160400 | -0.51270600 | -0.58089400 |
| C  | -6.17945200 | -1.55874200 | -0.00216100 |
| C  | -5.59223800 | -2.31480500 | 1.01878100  |
| C  | -4.29368800 | -2.03489100 | 1.45072900  |
| C  | -3.60442100 | 0.59948500  | -0.58826900 |
| H  | -5.89512300 | 0.08646700  | -1.37341600 |
| H  | -7.18897000 | -1.77953600 | -0.33990800 |
| H  | -6.14588700 | -3.13093000 | 1.47858400  |
| H  | -3.83938700 | -2.63235100 | 2.23640800  |
| C  | -0.77858700 | -2.25678400 | -1.21163400 |
| C  | -2.03910600 | -2.85238000 | -1.33011000 |
| C  | -2.16336800 | -4.21481700 | -1.06050700 |
| C  | -1.04032800 | -4.98418900 | -0.72562900 |
| C  | 0.21883500  | -4.38451800 | -0.67196400 |
| C  | 0.36710100  | -3.01958400 | -0.95333500 |

|   |             |             |             |
|---|-------------|-------------|-------------|
| I | -0.39685500 | -0.44215200 | -2.86959800 |
| H | -2.91141000 | -2.26284500 | -1.58804500 |
| H | -3.14709700 | -4.67454400 | -1.11291200 |
| H | -1.14767600 | -6.04765000 | -0.52879600 |
| H | 1.10162400  | -4.97291900 | -0.43421400 |
| H | 1.35534900  | -2.57319500 | -0.95254500 |

Thermal correction to Gibbs Free Energy= 0.668619  
 PCM energy (toluene) = -2230.79761463  
 PCM energy (DMF) = -2230.80534192

### OA-IM: IPr-Cu-SPh/iodobenzene

|    |             |             |             |
|----|-------------|-------------|-------------|
| N  | 2.06904000  | 0.32002300  | 1.16851000  |
| C  | 0.96301300  | 0.70188300  | 0.45561000  |
| N  | 0.99809900  | 2.07076000  | 0.49143600  |
| C  | 2.10714400  | 2.52293900  | 1.20052300  |
| C  | 2.77253600  | 1.42685200  | 1.63268300  |
| H  | 2.31069700  | 3.57385400  | 1.32677700  |
| H  | 3.66708600  | 1.32593100  | 2.22527000  |
| C  | 2.48177000  | -1.03761600 | 1.48514500  |
| C  | 1.87710500  | -1.68521400 | 2.58730000  |
| C  | 2.30591700  | -2.98600800 | 2.88626700  |
| C  | 3.30833600  | -3.60523400 | 2.14414700  |
| C  | 3.91949200  | -2.92493200 | 1.09453500  |
| C  | 3.53125500  | -1.62480000 | 0.74138500  |
| C  | 0.86952100  | -0.99283300 | 3.50334000  |
| H  | 0.38141100  | -0.19524400 | 2.93739600  |
| C  | -0.24669200 | -1.92522000 | 4.00611400  |
| H  | -0.74269900 | -2.43674500 | 3.17628400  |
| H  | -1.00595300 | -1.33656400 | 4.53318300  |
| H  | 0.13046800  | -2.67787300 | 4.70927100  |
| C  | 1.59865600  | -0.34268200 | 4.70145100  |
| H  | 2.35508100  | 0.38025600  | 4.37608800  |
| H  | 2.10177800  | -1.10349600 | 5.31128900  |
| H  | 0.88126200  | 0.18496700  | 5.34222900  |
| H  | 1.85561000  | -3.51745500 | 3.71845400  |
| H  | 3.62221400  | -4.61623800 | 2.39211000  |
| H  | 4.71159200  | -3.41278800 | 0.53590100  |
| C  | 4.29001700  | -0.88766200 | -0.36131400 |
| H  | 3.64331800  | -0.09116800 | -0.74233600 |
| C  | 4.65289100  | -1.78845400 | -1.55750500 |
| H  | 3.78179800  | -2.33383700 | -1.92916100 |
| H  | 5.43810400  | -2.51042500 | -1.30129200 |
| H  | 5.03673500  | -1.17010200 | -2.37735400 |
| C  | 5.57966200  | -0.24385100 | 0.19893800  |
| H  | 5.37865900  | 0.45613100  | 1.01637900  |
| H  | 6.10154600  | 0.30717600  | -0.59321300 |
| C  | 6.26238800  | -1.01324500 | 0.58066900  |
| C  | 0.02274000  | 3.00113800  | -0.05673100 |
| C  | 0.15162000  | 3.41101100  | -1.40228300 |
| C  | -0.79435200 | 4.32361700  | -1.89139000 |
| C  | -1.80153900 | 4.82987700  | -1.07432900 |
| C  | -1.87055100 | 4.44960100  | 0.26361000  |
| C  | -0.95949400 | 3.53521500  | 0.80969200  |
| C  | 1.31806400  | 2.97875500  | -2.28739600 |
| H  | 1.67996800  | 2.01118200  | -1.92958600 |
| C  | 0.93081300  | 2.78864000  | -3.76456700 |
| H  | 0.06947000  | 2.12265800  | -3.87212100 |
| H  | 1.76780700  | 2.33395200  | -4.30583500 |
| H  | 0.70190400  | 3.74201700  | -4.25683300 |
| C  | 2.47881800  | 3.99358900  | -2.17376000 |
| H  | 2.83016000  | 4.10200600  | -1.14153500 |
| H  | 2.16814800  | 4.98455900  | -2.52840400 |
| H  | 3.32878800  | 3.66588700  | -2.78506600 |
| H  | -0.73476100 | 4.64900800  | -2.92478400 |
| H  | -2.52495600 | 5.53489000  | -1.47679900 |
| H  | -2.64531100 | 4.87105600  | 0.89636100  |
| C  | -1.01381300 | 3.22691400  | 2.30566000  |
| H  | -0.48175300 | 2.28637200  | 2.47801200  |
| C  | -2.44545800 | 3.04300500  | 2.84337300  |
| H  | -3.00340400 | 2.31095200  | 2.25428400  |
| H  | -3.00422600 | 3.98677100  | 2.85009400  |
| H  | -2.40560300 | 2.68500200  | 3.87912400  |
| C  | -0.30221300 | 4.33688900  | 3.11384200  |
| H  | 0.74010500  | 4.47259600  | 2.80720500  |
| H  | -0.30912600 | 4.09180300  | 4.18323100  |
| H  | -0.81433300 | 5.29846800  | 2.98487000  |
| Cu | -0.37980600 | -0.54762500 | -0.43678700 |
| S  | -1.91082700 | -0.14276300 | 1.16164700  |
| C  | -3.59419700 | -0.56980500 | 0.77487900  |
| C  | -4.39793600 | 0.32495100  | 0.04477100  |
| C  | -5.75043100 | 0.05056900  | -0.16668300 |
| C  | -6.31917400 | -1.12002300 | 0.34645700  |
| C  | -5.52655500 | -2.01469600 | 1.07309300  |
| C  | -4.17371100 | -1.74362300 | 1.28658700  |
| H  | -3.95445700 | 1.23485700  | -0.34987000 |
| H  | -6.36049700 | 0.75143400  | -0.73177700 |
| H  | -7.37227100 | -1.33354300 | 0.18115000  |
| H  | -5.96126900 | -2.92825400 | 1.47154600  |
| C  | -3.55651600 | -2.44091600 | 1.84451800  |
| H  | -1.54497500 | -1.97527800 | -1.07959300 |
| C  | -2.53070000 | -1.78199700 | -2.04565400 |
| C  | -3.28331300 | -2.87481200 | -2.49295900 |
| C  | -3.05171700 | -4.15297100 | -1.97602200 |
| C  | -2.06210600 | -4.33546000 | -1.00652300 |
| C  | -1.30567700 | -3.24569400 | -0.55318900 |
| I  | 1.01405100  | -0.94502300 | -2.59465500 |
| H  | -2.71359900 | -0.79775500 | -2.46698400 |
| H  | -4.04689100 | -2.72125500 | -3.25237100 |
| H  | -3.63717000 | -4.99932400 | -2.32674300 |
| H  | -1.87076500 | -5.32509000 | -0.59656500 |

### OA-IM: IMes-Cu-SPh/iodobenzene

|    |             |             |             |
|----|-------------|-------------|-------------|
| N  | 1.74197300  | -1.83404400 | -1.09211500 |
| C  | 0.53053400  | -1.48761200 | -0.55878300 |
| N  | -0.23937700 | -2.60593700 | -0.73150000 |
| C  | 0.48279600  | -3.62308000 | -1.34974900 |
| C  | 1.72625100  | -3.13741900 | -1.57877900 |
| H  | 0.03994000  | -4.58428700 | -1.56066100 |
| H  | 2.59552300  | -3.58277100 | -2.03751800 |
| C  | 2.92534800  | -1.00248300 | -1.15990300 |
| C  | 3.05495800  | -0.07863200 | -2.21206800 |
| C  | 4.21571400  | 0.70605100  | -2.24910400 |
| C  | 5.23224100  | 0.57599200  | -1.29744200 |
| C  | 5.08792600  | -0.40010600 | -0.30421300 |
| C  | 3.95099600  | -1.21079200 | -0.21812000 |
| C  | 2.01485400  | 0.05936100  | -3.29860700 |
| H  | 1.11664200  | 0.57654000  | -2.94374400 |
| H  | 1.69482400  | -0.91831300 | -3.67799300 |
| H  | 2.42035100  | 0.63004300  | -4.14021900 |
| H  | 4.32846100  | 1.42910600  | -3.05457200 |
| C  | 6.45430900  | 1.46459400  | -1.33670200 |
| H  | 6.34266800  | 2.31379800  | -0.64905900 |
| H  | 6.62136500  | 1.87349500  | -2.33905600 |
| H  | 7.35662000  | 0.92024600  | -1.03579600 |
| H  | 5.88178700  | -0.53857000 | 0.42688600  |
| C  | 3.86808000  | -2.29417200 | 0.83094900  |
| H  | 2.92577200  | -2.25000700 | 1.38404400  |
| H  | 4.68391000  | -2.18897600 | 1.55241300  |
| H  | 3.94925000  | -3.29292600 | 0.38143200  |
| C  | -1.63172600 | -2.77865200 | -0.36926700 |
| C  | -1.95362400 | -3.18097400 | 0.93922700  |
| C  | -3.30847900 | -3.34983300 | 1.25360100  |
| C  | -4.32118000 | -3.15938700 | 0.30759600  |
| C  | -3.94979400 | -2.82633100 | -1.00020900 |
| C  | -2.61218000 | -2.64150000 | -1.36959500 |
| C  | -0.89329300 | -3.47536500 | 1.97218700  |
| H  | -0.34491100 | -2.57544300 | 2.26863100  |
| H  | -0.15399300 | -4.19239100 | 1.59372400  |
| H  | -1.34675800 | -3.90441400 | 2.87111400  |
| H  | -3.57272600 | -3.65279300 | 2.26476800  |
| C  | -5.77657700 | -3.31113300 | 0.68696800  |
| H  | -6.38342900 | -3.62969200 | -0.16772200 |
| H  | -6.19034800 | -2.35846600 | 1.04475800  |
| H  | -5.90756600 | -4.04448600 | 1.49037300  |
| H  | -4.71984000 | -2.71177800 | -1.76052400 |
| H  | -2.25874100 | -2.35056500 | -2.80899100 |
| C  | -1.64447200 | -1.45031000 | -2.89881600 |
| H  | -3.16647000 | -2.19733000 | -3.40067300 |
| H  | -1.70383400 | -3.18208200 | -3.26277200 |
| Cu | 0.05036800  | 0.31985700  | 0.27079000  |
| S  | -1.18077600 | 0.87333700  | -1.54009400 |
| C  | -2.29883500 | 2.24768600  | -1.38504400 |
| C  | -3.60792900 | 2.03408800  | -0.91618500 |
| C  | -4.53282500 | 3.07975600  | -0.89971000 |
| C  | -4.16335300 | 4.35235200  | -1.34807900 |
| C  | -2.86334000 | 4.57235800  | -1.81541800 |
| C  | -1.93630900 | 3.52877500  | -1.83545700 |
| H  | -3.89198100 | 1.04331800  | -0.57303800 |
| H  | -5.54235100 | 2.90111200  | -0.53678800 |
| H  | -4.88344800 | 5.16674800  | -1.33391900 |
| H  | -2.56912200 | 5.55970800  | -2.16310400 |
| H  | -0.92627600 | 3.69924800  | -2.19462800 |
| C  | -0.20302900 | 2.15161400  | 0.89765300  |
| C  | -1.27889300 | 2.53072900  | 1.69853700  |
| C  | -1.36796300 | 3.85154700  | 2.15519300  |
| C  | -0.38802100 | 4.78706800  | 1.81072600  |
| C  | 0.68529800  | 4.39642800  | 1.00552500  |
| C  | 0.78104800  | 3.07627100  | 0.54463200  |
| I  | 1.16118000  | -0.10063500 | 2.59736500  |
| H  | -2.04161300 | 1.81232100  | 1.98509000  |
| H  | -2.20535400 | 4.14242100  | 2.78570100  |
| H  | -0.45994300 | 5.81139600  | 2.16801400  |
| H  | 1.45603500  | 5.11432400  | 0.73224200  |
| H  | 1.62675200  | 2.78565700  | -0.07321200 |

Thermal correction to Gibbs Free Energy= 0.502000  
 PCM energy (toluene) = -1994.89200440  
 PCM energy (DMF) = -1994.90012182

H -0.53594700 -3.40588900 0.19744600  
 Thermal correction to Gibbs Free Energy= 0.671223  
 PCM energy (toluene) = -2230.81195233  
 PCM energy (DMF) = -2230.81974692

### RE-TS: IMes-Cu-SPh/iodobenzene

N 1.32900400 -2.27913600 -0.89040900  
 C 0.20345600 -1.59635700 -0.52018100  
 N -0.80465200 -2.49809700 -0.72060200  
 C -0.31338600 -3.71059700 -1.19962000  
 C 1.03045800 -3.57407500 -1.30671500  
 H -0.96699500 -4.54217800 -1.41448400  
 H 1.79690800 -4.26060200 -1.63266600  
 C 2.67217400 -1.74714900 -0.89076200  
 C 3.15189000 -1.12735500 -2.05741600  
 C 4.46471600 -0.63686000 -2.04353600  
 C 5.28987800 -0.76183500 -0.92053400  
 C 4.77676300 -1.40521900 0.21304200  
 C 3.47329100 -1.91297000 0.25463500  
 C 2.29858600 -0.99457200 -3.29789300  
 H 1.40334300 -0.39064700 -3.11427100  
 H 1.95828500 -1.97196700 -3.66138000  
 C 2.86479600 -0.51599600 -4.10258500  
 H 4.84867500 -0.14787300 -2.93643100  
 C 6.70846700 -0.23860000 -0.93111900  
 H 6.91484000 0.34131400 -1.83660100  
 H 7.43403200 -1.06141700 -0.88916100  
 H 6.90209500 0.40622700 -0.06539700  
 H 5.40656400 -1.51672900 1.09354200  
 C 2.95919900 -2.61063100 1.49066700  
 H 2.15483000 -2.03808500 1.96773600  
 C 3.76358600 -2.73468400 2.22088000  
 H 2.55720600 -3.60417000 1.25821800  
 C -2.21829900 -2.28116500 -0.49903500  
 C -2.79387800 -2.72636000 0.70570100  
 C -4.16679400 -2.52240000 0.88370900  
 C -4.96279000 -1.91647700 -0.09627100  
 C -4.35830900 -1.53800900 -1.29953400  
 C -2.98827800 -1.72019200 -1.53238600  
 C -1.98111700 -3.42554200 1.76837200  
 H -1.18086400 -2.78006900 2.14531000  
 H -1.51853800 -4.34385300 1.38473600  
 H -2.61709100 -3.70048200 2.61539200  
 H -4.62430500 -2.84978600 1.81512100  
 C -6.43686100 -1.68189100 0.14413600  
 H -6.96990900 -1.48647000 -0.79242600  
 H -6.59537900 -0.81662200 0.80171200  
 H -6.90657700 -2.54575600 0.62885700  
 C -4.96616700 -1.09767000 -2.08735500  
 H -2.38605500 -1.34899700 -2.86650400  
 H -1.66941900 -0.52613100 -2.76703500  
 H -3.16811700 -1.03361000 -3.56419100  
 H -1.85391100 -2.19569300 -3.31783800  
 Cu 0.20882400 0.34372900 0.16723400  
 S -0.23112800 1.53038600 -1.71091700  
 C -1.50914300 2.72839100 -1.40696500  
 C -2.69345700 2.38983400 -0.72804700  
 C -3.70684200 3.33751700 -0.56944100  
 C -3.56092400 4.62397800 -1.09980900  
 C -2.38758400 4.96343700 -1.78151600  
 C -1.36125800 4.02734900 -1.92473600  
 H -2.81715300 1.38757500 -0.32853600  
 H -4.61427300 3.06687500 -0.03525600  
 H -4.35460100 5.35703800 -0.98029400  
 H -2.26388400 5.96309700 -2.19082000  
 H -0.43907500 4.29613300 -2.43165000  
 C 0.97380100 2.15831700 0.43239800  
 C 0.36084700 3.19389500 1.13417000  
 C 1.15264200 4.22012700 1.65835200  
 C 2.53920300 4.21851100 1.46621900  
 C 3.13404600 3.18731500 0.73613100  
 C 2.34894000 2.16158000 0.19114900  
 I -0.09309700 -0.07302900 2.75108300  
 H -0.71000700 3.19333800 1.30849200  
 H 0.68021600 5.01513400 2.23074100  
 H 3.14798700 5.02085500 1.87517700  
 H 4.20817700 3.18279400 0.56457600  
 H 2.82026800 1.38802300 -0.40875200  
 Thermal correction to Gibbs Free Energy= 0.501471  
 PCM energy (toluene) = -1994.89002473  
 PCM energy (DMF) = -1994.89888036

### RE-TS: IPr-Cu-SPh/iodobenzene

N -1.85257700 -1.33816600 0.85087000  
 C -0.57981000 -1.09497200 0.40816600

N 0.04407400 -2.30878500 0.52388600  
 C -0.82506900 -3.27632500 1.02272700  
 C -2.01629900 -2.66733700 1.22969700  
 H -0.51127900 -4.29526300 1.18222500  
 H -2.95314300 -3.04373100 1.60886500  
 C -2.90175000 -0.35181500 1.01975200  
 C -2.99335000 0.31942700 2.26007300  
 C -4.04159000 1.23609900 2.42275500  
 C -4.96081900 1.46780000 1.40203400  
 C -4.85487500 0.77916800 0.19560200  
 C -3.82933600 -0.15080300 -0.02630900  
 C -2.04837200 0.03710700 3.42694500  
 H -1.17572300 -0.49590700 3.03732300  
 C -1.52780200 1.31776000 4.10744500  
 H -1.04662300 1.99042400 3.39086000  
 H -0.78459800 1.05536100 4.86980800  
 H -2.33069800 1.86825600 4.61212900  
 C -2.73029700 -0.88230900 4.46435300  
 H -3.06154100 -1.82562600 4.01558200  
 H -3.60929400 -0.39341600 4.90240900  
 H -2.03518900 -1.12053300 5.27888400  
 H -4.14176800 1.77197600 3.36193300  
 H -5.76517200 2.18456800 1.54853100  
 H -5.58029600 0.96830500 -0.58897100  
 C -3.77846200 -0.93982000 -1.33237300  
 H -2.74873600 -1.27865400 -1.48121400  
 C -4.15098500 -0.09694400 -2.56546700  
 H -3.55479200 0.81829200 -2.62017300  
 H -5.21490400 0.17126000 -2.57445100  
 H -3.95128100 -0.67412800 -3.47508800  
 H -4.68850900 -2.18620700 -1.24921500  
 C -4.40857300 -2.84735900 -0.42152000  
 H -4.62180900 -2.76514100 -2.17849200  
 H -5.73704500 -1.89530700 -1.10647400  
 C 1.43986300 -2.61045800 0.25201000  
 C 1.79111100 -3.14607300 -1.00737200  
 C 3.14078400 -3.46525100 -0.21640400  
 C 4.09320700 -3.27782100 -0.21842300  
 C 3.71203100 -2.78065300 1.02558700  
 C 2.37865700 -2.44472800 1.29684800  
 C 0.76323900 -3.44922000 -2.09591900  
 H -0.09313700 -2.78480600 -1.94610600  
 H 1.28874200 -3.18758700 -3.51929900  
 C 1.71472800 -2.18488400 -3.61102800  
 H 0.46035000 -3.26116200 -4.23290600  
 C 2.04438300 -3.92446900 -3.81943600  
 H 0.27093200 -4.91101100 -1.98866200  
 H -0.17992400 -5.12867700 -1.01470300  
 H 1.10122400 -5.61295800 -2.13769000  
 H -0.48369700 -5.11226000 -2.75907500  
 H 3.44938200 -3.86664400 -2.17607200  
 H 5.13436400 -3.52834700 -0.40708200  
 H 4.46224000 -2.65397700 1.79943900  
 C 1.98150400 -1.99916500 2.70355500  
 H 1.06380200 -1.40889500 2.62289900  
 C 3.03343700 -1.10500300 3.38532300  
 H 3.32805500 -0.26854200 2.74578500  
 H 3.93441900 -1.66776000 3.65867000  
 H 2.61851500 -0.69154700 4.31214700  
 C 1.68719200 -3.22522300 3.59833100  
 H 0.89067900 -3.85449000 3.18801300  
 H 1.37673000 -2.90004100 4.59928500  
 H 2.58394300 -3.84771300 3.70873400  
 Cu 0.07074300 0.72657500 -0.28614800  
 S 1.27850900 1.52346400 1.44380400  
 C 2.82500700 2.18091200 0.86319800  
 C 3.63849700 1.46600900 -0.03461300  
 C 4.88133400 1.97630400 -0.41548700  
 C 5.33592000 3.19214900 0.10667400  
 C 4.53415800 3.90352300 1.00561300  
 C 3.28113100 3.40920600 1.37395500  
 H 3.29539800 0.51439100 -0.42978900  
 H 5.49715400 1.41832000 -1.11647400  
 H 6.30679000 3.58326600 -0.18662500  
 H 4.87785700 4.85210000 1.41088800  
 H 2.64627100 3.97187300 2.05222100  
 C 0.01370700 2.70329600 -0.43321700  
 C 0.83409800 3.48166800 -1.24641000  
 C 0.40236300 4.75642800 -1.62480400  
 C -0.82904500 5.25246300 -1.18039000  
 C -1.62758700 4.46968000 -0.34423300  
 C -1.19748900 3.19627800 0.05601300  
 I -0.19576200 0.35295200 -2.87167100  
 H 1.77934400 3.09812600 -1.61577200  
 H 1.02876800 5.35534400 -2.28190700  
 H -1.15715800 6.24520600 -1.47776000  
 H -2.57984700 4.84773400 0.02105500  
 H -1.81374200 2.61421600 0.73541700  
 Thermal correction to Gibbs Free Energy= 0.671188  
 PCM energy (toluene) = -2230.81018289  
 PCM energy (DMF) = -2230.81866615

**σBM-TS: IMes-Cu-SPh/iodobenzene**

|    |             |             |             |
|----|-------------|-------------|-------------|
| N  | -2.90931300 | 1.45305400  | 0.12017200  |
| C  | -1.54706800 | 1.43914400  | 0.01720700  |
| N  | -1.22654400 | 2.72627100  | -0.31063100 |
| C  | -2.36424100 | 3.52272200  | -0.40991800 |
| C  | -3.42448700 | 2.71994800  | -0.13808400 |
| H  | -2.30781800 | 4.57047000  | -0.66310700 |
| H  | -4.48395600 | 2.92337500  | -0.10369800 |
| C  | -3.72070200 | 0.30713500  | 0.46009500  |
| C  | -4.28170900 | -0.45893400 | -0.57607000 |
| C  | -5.07933600 | -1.55184600 | -0.21774300 |
| C  | -5.31728200 | -1.89027800 | 1.11969600  |
| C  | -4.74262800 | -1.09591600 | 2.11876800  |
| C  | -3.93854500 | 0.00918300  | 1.81585200  |
| C  | -4.02189400 | -0.13893700 | -2.02933500 |
| H  | -2.96118200 | -0.26839500 | -2.27606800 |
| H  | -4.29243500 | 0.89393900  | -2.27942100 |
| H  | -4.59885200 | -0.80470700 | -2.67807400 |
| H  | -5.51814300 | -2.15822700 | -1.00748300 |
| C  | -6.14931900 | -3.10127900 | 1.47486900  |
| H  | -6.93223500 | -3.28294100 | 0.73029300  |
| H  | -6.62900100 | -2.98622100 | 2.45297400  |
| H  | -5.52528900 | -4.00404600 | 1.51966500  |
| C  | -4.91971700 | -1.34222500 | 3.16376900  |
| H  | -3.31710500 | 0.83350500  | 2.91913600  |
| H  | -2.22607000 | 0.72197500  | 2.92764500  |
| H  | -3.69475000 | 0.51603100  | 3.89579200  |
| H  | -2.53230500 | 1.90254000  | 2.80390600  |
| C  | 0.11708800  | 3.21407600  | -0.51399100 |
| C  | 0.81316300  | 3.75149000  | 0.58316400  |
| C  | 2.10667000  | 4.23755100  | 0.36046400  |
| C  | 2.70541800  | 4.19755600  | -0.90521100 |
| C  | 1.97214300  | 3.66197200  | -1.97017000 |
| C  | 0.67415600  | 3.16222700  | -1.80295000 |
| C  | 0.19904700  | 3.79842100  | 1.96318900  |
| H  | -0.01861500 | 2.79060700  | 2.33609200  |
| H  | -0.74534600 | 4.35603000  | 1.97233300  |
| H  | 0.88007900  | 4.27944200  | 2.67161600  |
| C  | 2.65851600  | 4.65886100  | 1.19858000  |
| H  | 4.11679900  | 4.69903800  | -1.10981700 |
| H  | 4.35200900  | 5.52499200  | -0.42944300 |
| H  | 4.27356000  | 5.04790800  | -2.13621400 |
| H  | 4.84758600  | 3.90120700  | -0.92033100 |
| H  | 2.41912900  | 3.62865900  | -2.96166400 |
| C  | -0.08066600 | 2.57636300  | -2.97259500 |
| H  | -0.18986400 | 1.49001700  | -2.86713800 |
| H  | 0.45276300  | 2.76826100  | -3.90848500 |
| H  | -1.08808300 | 2.99886400  | -3.06363000 |
| Cu | -0.37647800 | -0.05934000 | 0.28125500  |
| S  | 0.86928000  | -1.67624400 | 1.17308000  |
| C  | 2.14200300  | -1.05487300 | 2.24153900  |
| C  | 2.60404500  | 0.27377200  | 2.18279400  |
| C  | 3.63548200  | 0.70497700  | 3.01993300  |
| C  | 4.23449600  | -0.18137800 | 3.92100600  |
| C  | 3.79025900  | -1.50716400 | 3.97805500  |
| C  | 2.75507000  | -1.94125100 | 3.14882500  |
| H  | 2.14899500  | 0.96592300  | 1.47974500  |
| C  | 3.97645100  | 1.73638300  | 2.96212200  |
| H  | 5.03914700  | 0.15584900  | 4.56948700  |
| H  | 4.25019700  | -2.20639300 | 4.67250000  |
| H  | 2.41033900  | -2.97031100 | 3.19880900  |
| C  | 2.13223700  | -2.44721000 | -0.80821400 |
| C  | 3.20862200  | -1.59478100 | -1.03689900 |
| C  | 4.48390700  | -2.15833900 | -1.16941100 |
| C  | 4.67096500  | -3.54146800 | -1.08446700 |
| C  | 3.56438100  | -4.36826000 | -0.86204100 |
| C  | 2.27882600  | -3.83010500 | -0.72679100 |
| I  | 0.06448700  | -1.77534200 | -2.18493200 |
| H  | 3.06989500  | -0.52172700 | -1.11053100 |
| H  | 5.33186700  | -1.49924400 | -1.34408100 |
| H  | 5.66384500  | -3.96942000 | -1.19206200 |
| H  | 3.68985200  | -5.44699500 | -0.79413900 |
| H  | 1.42325500  | -4.47423900 | -0.55613400 |

Thermal correction to Gibbs Free Energy= 0.496844

PCM energy (toluene) = -1994.86914840

PCM energy (DMF) = -1994.87793612

**σBM-TS: IPr-Cu-SPh/iodobenzene**

|   |            |             |             |
|---|------------|-------------|-------------|
| N | 2.83143400 | -0.18727500 | -0.43063500 |
| C | 1.68783100 | 0.45368700  | -0.03351900 |
| N | 2.13673000 | 1.66032000  | 0.43226900  |
| C | 3.52009900 | 1.76579800  | 0.32488900  |
| C | 3.95669000 | 0.60345700  | -0.22162100 |
| H | 4.05243800 | 2.64941600  | 0.64100600  |

|    |             |             |             |
|----|-------------|-------------|-------------|
| H  | 4.94812800  | 0.26635800  | -0.48076000 |
| C  | 2.88529800  | -1.50877300 | -1.01890800 |
| C  | 3.19644400  | -2.60652100 | -0.18750500 |
| C  | 3.27046600  | -3.86953300 | -0.78963200 |
| C  | 3.04360900  | -4.03292500 | -2.15482100 |
| C  | 2.74517800  | -2.92983200 | -2.95124300 |
| C  | 2.66328400  | -1.64094800 | -2.40616100 |
| C  | 3.48876400  | -2.45311000 | 1.30339600  |
| H  | 3.13608900  | -1.46480200 | 1.61591100  |
| C  | 2.74883400  | -3.49070800 | 2.16885800  |
| H  | 1.67195600  | -3.48006900 | 1.97458600  |
| H  | 2.90496600  | -3.26642900 | 3.23101600  |
| C  | 3.11958600  | -4.50787600 | 1.99395800  |
| H  | 5.00854400  | -2.51500800 | 1.57281800  |
| H  | 5.55583700  | -1.75105500 | 1.00849400  |
| H  | 5.41616100  | -3.49334900 | 1.28957200  |
| H  | 5.21395000  | -2.36003100 | 2.63925500  |
| H  | 3.50253200  | -4.73836000 | -0.18103300 |
| H  | 3.10011900  | -5.02359400 | -2.59902200 |
| H  | 2.57512900  | -3.07052800 | -4.01481500 |
| C  | 2.39165400  | -0.44918000 | -3.32097700 |
| C  | 2.22795300  | 0.43143100  | -2.69313700 |
| H  | 1.12087100  | -0.63518300 | -4.17243400 |
| H  | 0.24150800  | -0.81496200 | -3.54557200 |
| H  | 1.21968200  | -1.47222500 | -4.87416500 |
| H  | 0.93398800  | 0.26879700  | -4.76499000 |
| C  | 3.61643700  | -0.15772100 | -4.21481400 |
| H  | 4.51833700  | 0.02233600  | -3.61749100 |
| H  | 3.43470700  | 0.73055800  | -4.83244500 |
| H  | 3.82478800  | -0.99790600 | -4.88859000 |
| C  | 1.29603800  | 2.72953400  | 0.92401200  |
| C  | 0.88651200  | 3.73017700  | 0.01709600  |
| C  | 0.10213700  | 4.77620400  | 0.52228600  |
| C  | -0.25585800 | 4.82329100  | 1.86797200  |
| C  | 0.16776300  | 3.82276200  | 2.74122900  |
| C  | 0.95555400  | 2.75333600  | 2.29345500  |
| H  | 1.29110000  | 3.72706500  | -1.45527000 |
| C  | 1.78403300  | 2.77408200  | -1.66939700 |
| C  | 0.07849600  | 3.82907200  | -2.40067000 |
| H  | -0.64712200 | 3.03233000  | -2.21129100 |
| H  | 0.41136400  | 3.74875900  | -3.44273200 |
| H  | -0.44068000 | 4.78915300  | -2.29520800 |
| C  | 2.30998700  | 4.84931100  | -1.74837400 |
| C  | 3.20065700  | 4.76329200  | -1.11460800 |
| H  | 1.87081600  | 5.83909000  | -1.57317700 |
| H  | 2.63324000  | 4.80632700  | -2.79573200 |
| H  | -0.23443800 | 5.56233500  | -0.14764600 |
| H  | -0.86563800 | 5.64352700  | 2.23885600  |
| C  | -0.11642800 | 3.87469600  | 3.78799400  |
| H  | 1.45761000  | 1.70423200  | 3.28241100  |
| H  | 1.82693200  | 0.84909800  | 2.70827000  |
| C  | 0.34882700  | 1.17481600  | 4.21085200  |
| H  | -0.49327600 | 0.77192200  | 3.63966100  |
| H  | -0.02875800 | 1.95311600  | 4.88498800  |
| C  | 0.74431200  | 0.36569000  | 4.83615300  |
| H  | 2.64031800  | 2.25947600  | 4.10616700  |
| H  | 3.46307800  | 2.59115200  | 3.46173600  |
| H  | 3.02921300  | 1.48842400  | 4.78259500  |
| H  | 2.32699700  | 3.11618900  | 4.71579000  |
| Cu | -0.12273600 | -0.19893000 | -0.16769200 |
| S  | -2.02702300 | -0.52440800 | -1.34823200 |
| C  | -3.04283100 | 0.92560400  | -1.41160800 |
| C  | -2.90209800 | 1.99155500  | -0.50167600 |
| C  | -3.75972900 | 3.09268200  | -0.55805800 |
| C  | -4.77980900 | 3.14855600  | -1.51323300 |
| C  | -4.93456900 | 2.08951300  | -2.41517200 |
| C  | -4.07763800 | 0.98911600  | -2.36621400 |
| H  | -2.11415800 | 1.95544500  | 0.24536400  |
| H  | -3.63013000 | 3.90674000  | 0.15145300  |
| H  | -5.44773300 | 4.00531700  | -1.55344000 |
| H  | -5.72623000 | 2.11961600  | -3.16025300 |
| H  | -4.20142700 | 0.16840500  | -3.06716800 |
| C  | -3.34658800 | -1.93910500 | 0.25474900  |
| C  | -4.34185000 | -1.16789600 | 0.84203900  |
| C  | -5.66117900 | -1.63838200 | 0.78684800  |
| C  | -5.96313800 | -2.85633500 | 0.17096900  |
| C  | -4.93118500 | -3.61111300 | -0.39858500 |
| C  | -3.60555600 | -3.16299500 | -0.35573200 |
| I  | -1.20524300 | -2.01618800 | 1.70409900  |
| H  | -4.11372700 | -0.22297000 | 1.32334300  |
| H  | -6.44965200 | -1.04025700 | 1.23882300  |
| H  | -6.98812700 | -3.21547100 | 0.13792000  |
| H  | -5.14827500 | -4.56120600 | -0.88245400 |
| H  | -2.80818700 | -3.75023400 | -0.79843300 |

Thermal correction to Gibbs Free Energy= 0.664407

PCM energy (toluene) = -2230.79230552

PCM energy (DMF) = -2230.80056161
